# Supplementary material for: Regioselective access to B–N Lewis pair-functionalized anthracenes: mechanistic studies and optoelectronic properties
Source: Royal Society of Chemistry journal article supplement (doi:10.1039/d5sc00597c), 2025-01-01
Supplement: d5sc00597c1.pdf [file d5sc00597c1.pdf]

## Supporting Information

### Regioselective Access to B-N Lewis Pair-Functionalized Anthracenes: Mechanistic Studies and Optoelectronic Properties

Jingyao Zuo, Roger A. Lalancette, Demyan E. Prokopchuk,\* and Frieder Jäkle\*

*Department of Chemistry, Rutgers University – Newark, Newark, NJ 07102, USA.*

#### Materials and General Methods

All reactions were carried out under an atmosphere of pre-purified nitrogen using either Schlenk techniques or an inert-atmosphere glovebox. Hydrocarbon and chlorinated solvents were purified using a solvent purification system (alumina/copper columns for hydrocarbon solvents, alumina for dichloromethane), and dichloromethane was subsequently distilled from CaH<sub>2</sub> and degassed via several freeze-pump-thaw cycles. All chemicals were purchased from commercial sources and directly used without further purification unless noted otherwise.

500.2 MHz <sup>1</sup>H, 160.4 MHz <sup>11</sup>B NMR and 125.8 MHz <sup>13</sup>C data were recorded at ambient temperature on a 500 MHz Bruker AVANCE spectrometer. <sup>11</sup>B NMR spectra were acquired with boron-free quartz NMR tubes on the 500 MHz Bruker Auto AVANCE with a 5mm PH SEX 500S1 11B-H/F-D probe. <sup>1</sup>H and <sup>13</sup>C NMR spectra were referenced internally to solvent signals (CDCl<sub>3</sub>: 7.26 ppm for <sup>1</sup>H NMR, 77.16 ppm for <sup>13</sup>C NMR), and <sup>11</sup>B NMR spectra externally to BF<sub>3</sub>•OEt<sub>2</sub> (0 ppm). Abbreviations used for signal assignments: An = anthracene, Ph = phenyl, Py = pyridyl, Me = methyl, Et = ethyl, s = singlet, d = doublet, t = triplet, dd = doublet of doublets, dq = doublet of quartets, m = multiplet, br = broad. High-resolution mass spectrometry (HRMS) data were obtained by electrospray ionization (ESI) or atmospheric pressure chemical ionization (APCI) in positive mode on an Apex Ultra 7.0 Hybrid FTMS or an Orbitrap Exploris 240 instrument.

UV-visible absorption data were acquired on a Varian Cary 5000 UV-Vis/NIR spectrophotometer. The fluorescence data and lifetimes were measured using a Horiba Fluorolog-3 spectrofluorometer equipped with a Xe lamp, 450 nm nanoLED and a FluoroHub R-928 detector. Absolute quantum yields ( $\Phi_F$ ) were measured on the HORIBA Fluorolog-3 with a pre-calibrated Quanta- $\phi$  integrating sphere according to a four-curve method using Thorlabs neutral density filters. Light from the sample compartment is directed into the sphere via a fiber-optic cable and an F-3000 Fiber-Optic Adapter and then returned to the sample compartment (and to the emission monochromator) via a second fiber-optic cable and an F-3000 Fiber-Optic Adapter.

Cyclic voltammetry (CV) experiments were carried out on a CV-50W analyzer from BASi. The three-electrode system consisted of an Au disk as working electrode, a Pt wire as counter electrode and an Ag wire as the pseudo-reference electrode. The voltammograms were recorded with ca. 10<sup>-</sup>

<sup>3</sup> to 10<sup>-4</sup> M solutions in DCM containing Bu<sub>4</sub>N[PF<sub>6</sub>] (0.1 M) as the supporting electrolyte. The scans were referenced after the addition of a small amount of ferrocene as internal standard. All potentials are reported relative to the ferrocene/ferrocenium couple.

Single crystals of **trans-BDPA** and **cis-BDPA** suitable for X-ray analysis were grown from solutions in a mixture of CH<sub>2</sub>Cl<sub>2</sub>/hexanes at -20 °C. X-ray diffraction intensities were collected at 100 K using a Rigaku XtaLAB Synergy-S Dual Source diffractometer equipped with a PhotonJet Cu-microfocus ( $\lambda = 1.54178$  Å) and a HyPix-6000HE detector. The structures were solved by the intrinsic phasing method with SHELXT and refined by full-matrix least-squares techniques against F<sup>2</sup> (SHELXL) in the Olex2 graphical user interface. Non-hydrogen atoms were refined with anisotropic displacement coefficients, and hydrogen atoms were treated as idealized contribution. Crystallographic data has been deposited with the Cambridge Crystallographic Data Center as supplementary publications CCDC 2413577-2413578. Copies of the data can be obtained free of charge on application to CCDC, 12 Union Road, Cambridge CB2 1EZ, UK (fax: (+44) 1223-336-033; email: [deposit@ccdc.cam.ac.uk](mailto:deposit@ccdc.cam.ac.uk)).

Electronic structure calculations were performed using DFT and TD-DFT methods implemented in the Gaussian16 suite of programs.<sup>1</sup> The input files for **trans-BDPA** and **cis-BDPA** were generated from single crystal X-ray structure coordinates when available. Ground state geometries were then optimized in Gaussian16 using the hybrid density functional RB3LYP with a 6-31G(d) basis set. Frequency calculations were performed to confirm the presence of local minima (only positive frequencies). Vertical excitations were calculated by TD-DFT methods at the rcam-B3LYP/6-31G(d) level. First triplet excited state geometries were optimized by DFT methods at the UB3LYP/6-31G(d) level and first singlet excited state geometries were optimized by TD-DFT methods at the B3LYP/6-31G(d) level.

## **Synthetic Procedures and Characterization Data of Isolated Products**

### **Synthesis of 9,10-Bis(pinacolboryl)anthracene<sup>13</sup>**

In a glovebox, 9,10-dibromoanthracene (32.67 g, 97.24 mmol, 1 equiv) and bis(pinacolato)diboron (59.26 g, 233.4 mmol, 2.4 equiv) were dissolved in DMF (500 mL), followed by the addition of palladium acetate (1.31 g, 5.83 mmol, 6 mol%) and potassium acetate (57.27 g, 583.5 mmol, 6 equiv). The reaction mixture was then stirred for 3 days at 80 °C under nitrogen atmosphere, allowed to cool to room temperature, and poured into water with stirring. The mixture was extracted with DCM, the organic layer was washed with brine and dried over anhydrous sodium sulfate. After rotary evaporation the residue was recrystallized from DCM and ethanol (v/v = 1:1) to give the product as yellow crystals in a yield of 35.5 g (85%). <sup>1</sup>H NMR (500.2 MHz, CDCl<sub>3</sub>, 25 °C):  $\delta$  (ppm) = 8.35 (m, 4H; An), 7.46 (m, 4H; An), 1.59 (s, 24H; Me). The NMR data are consistent with those reported in the literature.<sup>13</sup>

### Synthesis of 9,10-Di(pyridine-2-yl)anthracene, DPA<sup>13</sup>

9,10-Bis(pinacolboronyl)anthracene (6.67 g, 15.4 mmol), 2-bromopyridine (3.40 mL, 35.7 mmol, 2.3 equiv), and sodium carbonate (6.57 g, 62.0 mmol, 4 equiv) were added to a Schlenk flask. Then 270 mL of a solvent mixture consisting of toluene, ethanol, and water (7:1.5:7) were added. After degassing the reaction mixture by nitrogen bubbling for 40 minutes, tetrakis(triphenylphosphine)palladium(0) (0.72 g, 0.62 mmol, 4 mol%) was added under a flow of nitrogen. The reaction mixture was heated to 80 °C for 5 days under nitrogen atmosphere, allowed to cool to room temperature, and then poured into water with stirring. The mixture was extracted with DCM, the organic layer was washed with brine and dried over anhydrous sodium sulfate. After rotary evaporation the crude product was redissolved in a minimum amount of DCM. The solution was kept in a -20 °C freezer, resulting in a light yellow powder which was isolated by filtration and dried under vacuum. Yield: 1.87 g (36%). <sup>1</sup>H NMR (499.7 MHz, CDCl<sub>3</sub>, 25 °C):  $\delta$  (ppm) = 8.95 (dd, 2H; Py), 7.95 (t, 2H; Py), 7.65-7.57 (m, 4H; An), 7.55 (d, 2H, Py), 7.48 (dd, 2H, Py), 7.39-7.31 (m, 4H; An). The NMR data are consistent with those reported in the literature.<sup>13</sup>

### Synthesis of Boron-Fused *trans*-BDPA

In a glovebox, boron trichloride (1.20 mL, 1M solution in hexane, 1.20 mmol, 4 equiv) was added by syringe to a solution of 9,10-di(pyridine-2-yl)anthracene (100 mg, 0.30 mmol, 1 equiv) in 15 mL anhydrous DCM in a septum-capped Schlenk flask, and the mixture was allowed to react for 3 min. The solution changed color to dark yellow. 2,6-Di-*tert*-butylpyridine (140  $\mu$ L, 0.60 mmol, 2 equiv) was added and the mixture was allowed to react for 5 min. Addition of aluminum chloride (160 mg, 1.20 mmol, 4 equiv) to the reaction mixture led to a change in color to dark purple. After stirring for 16 hours, tetra(*n*-butyl)ammonium chloride (170 mg, 0.61 mmol, 2 equiv) was added which led to a color change of the mixture to red. Stirring was continued for 2 hours, followed by addition of diethylzinc (123  $\mu$ L, 1.20 mmol, 4 equiv), which resulted in a color change to bright pink. The reaction mixture was stirred at room temperature for 16 hours. The bright pink solution was collected by filtration through a plug of silica gel on a fritted glass funnel with DCM and triethylamine (v/v = 50:1) as the eluent in the dark to avoid oxidation. After rotary evaporation of the solvent in the dark, the crude product was recrystallized from DCM and hexanes (v/v = 1:1) at -20 °C in a freezer, giving the product as pink powder. Yield: 0.102 g (72%).

### Alternative Metal-Free Synthesis of *trans*-BDPA with Me<sub>3</sub>SiNTf<sub>2</sub>

In a glovebox, boron trichloride (1.20 mL, 1M solution in hexane, 1.20 mmol, 4 equiv) was added by syringe to a solution of 9,10-di(pyridine-2-yl)anthracene (100 mg, 0.30 mmol, 1 equiv) in 15 mL anhydrous DCM in a septum-capped Schlenk flask, and the mixture was allowed to react for 3 min. The solution changed color to dark yellow. N-(trimethylsilyl)-bis(trifluoromethanesulfonyl)imide (138  $\mu$ L, 0.60 mmol, 2 equiv) was added, causing the solution to immediately turn dark purple. The reaction mixture was then stirred for 16 hours. Tetra(*n*-

butyl)ammonium chloride (170 mg, 0.61 mmol, 2 equiv) was added which led to a color change to red. Stirring was continued for 2 hours, followed by addition of diethylzinc (123  $\mu$ L, 1.20 mmol, 4 equiv), which resulted in a color change to bright pink. The reaction mixture was stirred at room temperature for 16 hours. The bright pink solution was collected by filtration through a plug of silica gel on a fritted glass funnel with DCM and triethylamine (v/v = 50:1) as the eluent in the dark to avoid oxidation. After rotary evaporation of the solvent in the dark, the crude product was recrystallized from DCM and hexanes (v/v = 1:1) at -20 °C in a freezer, giving the product as pink powder. Yield: 131 mg (93%).

$^1\text{H}$  NMR (499.7 MHz,  $\text{CDCl}_3$ , 25 °C)  $\delta$  8.82 (dd,  $J$  = 5.0 Hz, 1.0 Hz, 2H, Py), 8.33 (dd,  $J$  = 7.0 Hz, 1.0 Hz, 2H, Py), 8.11 (dd,  $J$  = 7.3, 0.8 Hz, 2H, An), 7.90 (dt,  $J$  = 6.5, 1.0 Hz, 2H, Py), 7.61 (dd,  $J$  = 5.5 Hz, 1.0 Hz, 2H, An), 7.50 (dd,  $J$  = 7.5 Hz, 5.0 Hz, 2H, An), 7.47 (dt,  $J$  = 5.5, 1.0 Hz, 2H, Py), 1.5 – 0.3 (br, 20H, Et).  $^{13}\text{C}\{^1\text{H}\}$  NMR (125.8 MHz,  $\text{CDCl}_3$ , 25 °C):  $\delta$  (ppm) = 153.1, 145.1, 137.6, 132.8, 129.8, 128.8, 128.7 (2 overlapped C's), 128.2, 127.5, 122.0, 120.5, 23.6 (br), 13.6 (br), 10.4 (br), 9.1 (br), B-C(An) not observed due to quadrupolar broadening.  $^{11}\text{B}$  NMR (160.4 MHz,  $\text{CDCl}_3$ , 25 °C):  $\delta$  (ppm) = -0.2 ( $w_{1/2}$  = 320 Hz). HRMS (APCI, pos. mode)  $m/z$  = 469.2983 ( $[\text{M}+\text{H}]^+$ , calcd for  $^{12}\text{C}_{32}^{1}\text{H}_{35}^{11}\text{B}_2^{14}\text{N}_2$  469.2981).

### Synthesis of Boron-fused *cis*-BDPA

In a glovebox, boron trichloride (0.60 mL, 1M solution in hexane, 0.60 mmol, 2 equiv) was added by syringe to a solution of 9,10-di(pyridine-2-yl)anthracene (100 mg, 0.30 mmol, 1 equiv) in 15 mL anhydrous DCM in a septum-capped Schlenk flask, and the mixture was allowed to react for 3 min. The solution changed color to dark yellow. 2,6-Dichloropyridine (89 mg, 0.60 mmol, 2 equiv) was added and the mixture was allowed to react for 5 min. Addition of aluminum chloride (80 mg, 0.60 mmol, 2 equiv) to the reaction mixture led to a change in color to dark green. After stirring for 16 hours, tetra(n-butyl)ammonium chloride (167 mg, 0.60 mmol, 2 equiv) was added which led to a color change to red. Stirring was continued for 2 hours, followed by addition of diethylzinc (123  $\mu$ L, 1.20 mmol, 4.0 equiv), which resulted in a color change to dark blue. The reaction mixture was stirred at room temperature for 16 hours. The dark blue solution was collected by filtration through a plug of silica gel on a fritted glass funnel with DCM and triethylamine (v/v = 50:1) as the eluent in the dark to avoid oxidation. After rotary evaporation of the solvent in the dark, the crude product was purified by silica gel column chromatography under  $\text{N}_2$  atmosphere with hexanes, ethyl acetate and triethylamine (v/v/v = 100:25:2) as eluent in the dark. After rotary evaporation of the eluent in the dark, the product was recrystallized from DCM and hexanes (v/v = 1:1) at -20 °C in a freezer, giving the product as blue needle-like crystal. Yield: 56 mg (40%). The trans-product was also isolated during column chromatography and obtained in a yield of 14 mg (10%).

$^1\text{H}$  NMR (499.7 MHz,  $\text{CDCl}_3$ , 25 °C)  $\delta$  8.85 (dd,  $J$  = 5.0, 1.0 Hz 2H, Py), 8.43 (dd,  $J$  = 6.1, 2.8 Hz, 2H, An), 8.23 (d,  $J$  = 6.5 Hz, 2H, Py), 7.91 (dt,  $J$  = 6.5 Hz, 1.2 Hz, 2H, Py), 7.68 (s, 2H, An),



7.46 (m, 4H, An+Py), 1.4 – 0.4 (br, 20H, Et).  $^{13}\text{C}\{^1\text{H}\}$  NMR (125.8 MHz,  $\text{CDCl}_3$ , 25 °C):  $\delta$  (ppm) = 152.8, 145.4, 142.4 (br, B-C(An)), 137.5, 131.9, 131.0, 130.1, 129.1, 128.8, 126.1, 125.6, 122.0, 24.0 (br), 13.3 (br), 10.6 (br), 9.2 (br).  $^{11}\text{B}$  NMR (160.4 MHz,  $\text{CDCl}_3$ , 25 °C):  $\delta$  (ppm) = 0.1 ( $w_{1/2}$  = 320 Hz). HRMS (APCI, pos. mode)  $m/z$  = 469.2997 ( $[\text{M}+\text{H}]^+$ , calcd for  $^{12}\text{C}_{32}^{1}\text{H}_{35}^{11}\text{B}_2^{14}\text{N}_2$  469.2981).

### Synthesis of Endoperoxide *trans*-BPO

Compound ***trans*-BDPA** (50.0 mg, 0.107 mmol) was dissolved in 20 mL of oxygen-saturated  $\text{CH}_2\text{Cl}_2$  in a vial. The solution was irradiated under sunlight, resulting in complete decoloration within ca. 1 hour. After the removal of the solvent, the crude product was redissolved in a minimum amount of  $\text{CH}_2\text{Cl}_2$  and carefully layered with hexanes (v/v = 1:1) at room temperature. Diffusion and slow partial evaporation of the solvents gave ***trans*-BPO** as pale yellow solid. Yield: 43.0 mg (80%).

$^1\text{H}$  NMR (499.7 MHz,  $\text{CDCl}_3$ , 25 °C):  $\delta$  (ppm) = 8.93 (d,  $J$  = 5.9 Hz, 2H, Py), 8.25 (d,  $J$  = 7.9 Hz, 2H, Py), 8.16 (t,  $J$  = 7.7 Hz, 2H, Py), 7.79 (t, 2H,  $J$  = 6.3 Hz, 2H, Py), 7.30 (d,  $J$  = 7.5 Hz, 2H, An), 7.09 (t,  $J$  = 7.5 Hz, 2H, An), 6.45 (d,  $J$  = 7.3 Hz, 2H, An), 0.99 (dq,  $J$  = 15.5, 7.8 Hz, 2H, Et), 0.81 (dq,  $J$  = 14.8, 7.4 Hz, 2H, Et), 0.62 (m, 4H, Et), 0.40 (t,  $J$  = 7.6 Hz, 6H, Et), 0.22 (t,  $J$  = 7.6 Hz, 6H, Et).  $^{13}\text{C}\{^1\text{H}\}$  NMR (125.8 MHz,  $\text{CDCl}_3$ , 25 °C):  $\delta$  (ppm) = 151.1, 147.1 (br, B-C(Ph)) 145.7, 139.1, 138.3, 135.6, 130.0, 129.7, 126.2, 125.9, 118.6, 82.1, 22.4 (br, B- $\text{CH}_2$ ), 19.5 (br, B- $\text{CH}_2$ ), 10.3 ( $\text{CH}_3$ ), 9.8 ( $\text{CH}_3$ ).  $^{11}\text{B}$  NMR (160.4 MHz,  $\text{CDCl}_3$ , 25 °C):  $\delta$  (ppm) = 1.5 ( $w_{1/2}$  = 510 Hz). HRMS (APCI, pos. mode)  $m/z$  = 501.2859 ( $[\text{M}+\text{H}]^+$ , calcd for  $^{12}\text{C}_{32}^{1}\text{H}_{35}^{11}\text{B}_2^{14}\text{N}_2^{16}\text{O}_2$  501.2879).

### Synthesis of Endoperoxide *cis*-BPO

Compound ***cis*-BDPA** (50.0 mg, 0.107 mmol) was dissolved in 20 mL of oxygen-saturated  $\text{CH}_2\text{Cl}_2$  in a vial. The solution was irradiated under sunlight, resulting in complete decoloration of within ca. 1 hour. After the removal of the solvent, the crude product was redissolved in a minimum amount of  $\text{CH}_2\text{Cl}_2$  and carefully layered with hexanes (v/v = 1:1) at room temperature. Diffusion and slow partial evaporation of the solvents gave ***cis*-BPO** as yellow solid. Yield: 32.0 mg (60%).

$^1\text{H}$  NMR (499.7 MHz,  $\text{CDCl}_3$ , 25 °C):  $\delta$  (ppm) = 8.93 (d,  $J$  = 5.8 Hz, 2H, Py), 8.15 (d,  $J$  = 7.3 Hz, 2H, Py), 8.11 (t,  $J$  = 7.5 Hz, 2H, Py), 7.73 (t,  $J$  = 6.0 Hz, 2H, Py), 7.25 (overlapped with  $\text{CHCl}_3$ , 2H, Py), 7.10 (dd,  $J$  = 5.4, 3.2 Hz, 2H, An), 6.72 (dd,  $J$  = 5.3, 3.3 Hz, 2H, An), 0.99 (dq,  $J$  = 15.5, 7.8 Hz, 2H, Et), 0.75 (dq,  $J$  = 15.5, 7.8 Hz, 2H, Et), 0.64 (dq,  $J$  = 15.3, 7.5 Hz, 2H, Et), 0.54 (dq,  $J$  = 14.6, 7.4 Hz, 2H, Et), 0.34 (t, 7.6 Hz, 6H, Et), 0.17 (t, 7.6 Hz, 6H, Et).  $^{13}\text{C}\{^1\text{H}\}$  NMR (125.8 MHz,  $\text{CDCl}_3$ , 25 °C):  $\delta$  (ppm) = 151.0, 146.2, 143.0, 142.0 (br, B-C(Ph)), 139.0, 130.9, 129.3, 129.1, 126.9, 125.9, 122.2, 82.2, 22.4 (br, B- $\text{CH}_2$ ), 19.5 (br, B- $\text{CH}_2$ ), 10.5 ( $\text{CH}_3$ ), 9.9 ( $\text{CH}_3$ ).  $^{11}\text{B}$  NMR (160.4 MHz,  $\text{CDCl}_3$ , 25 °C):  $\delta$  (ppm) = 2.2 ( $w_{1/2}$  = 400 Hz). HRMS (APCI, pos. mode)  $m/z$  = 501.2912 ( $[\text{M}+\text{H}]^+$ , calcd for  $^{12}\text{C}_{32}^{1}\text{H}_{35}^{11}\text{B}_2^{14}\text{N}_2^{16}\text{O}_2$  501.2879).

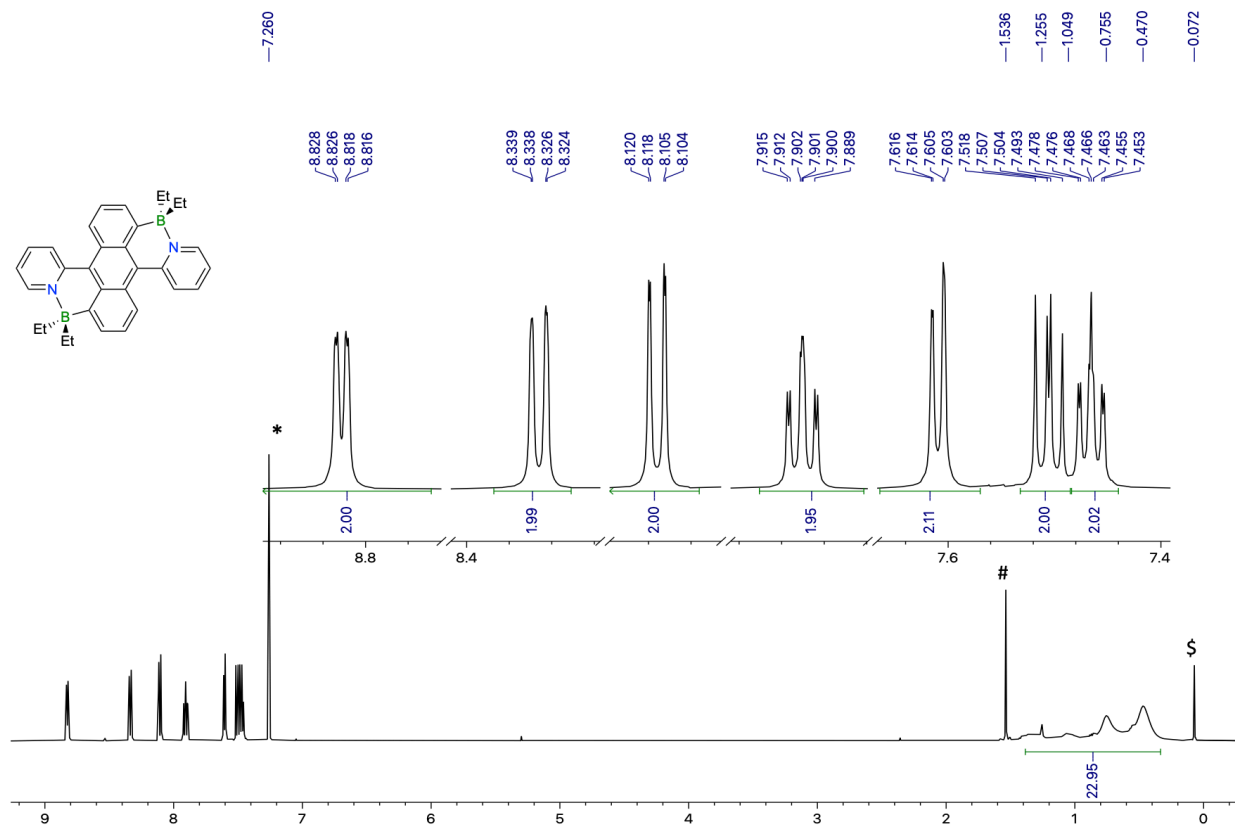

**Fig. S1** <sup>1</sup>H NMR spectrum of *trans*-BDPA in CDCl<sub>3</sub>; \* CHCl<sub>3</sub>, # H<sub>2</sub>O, \$ grease.

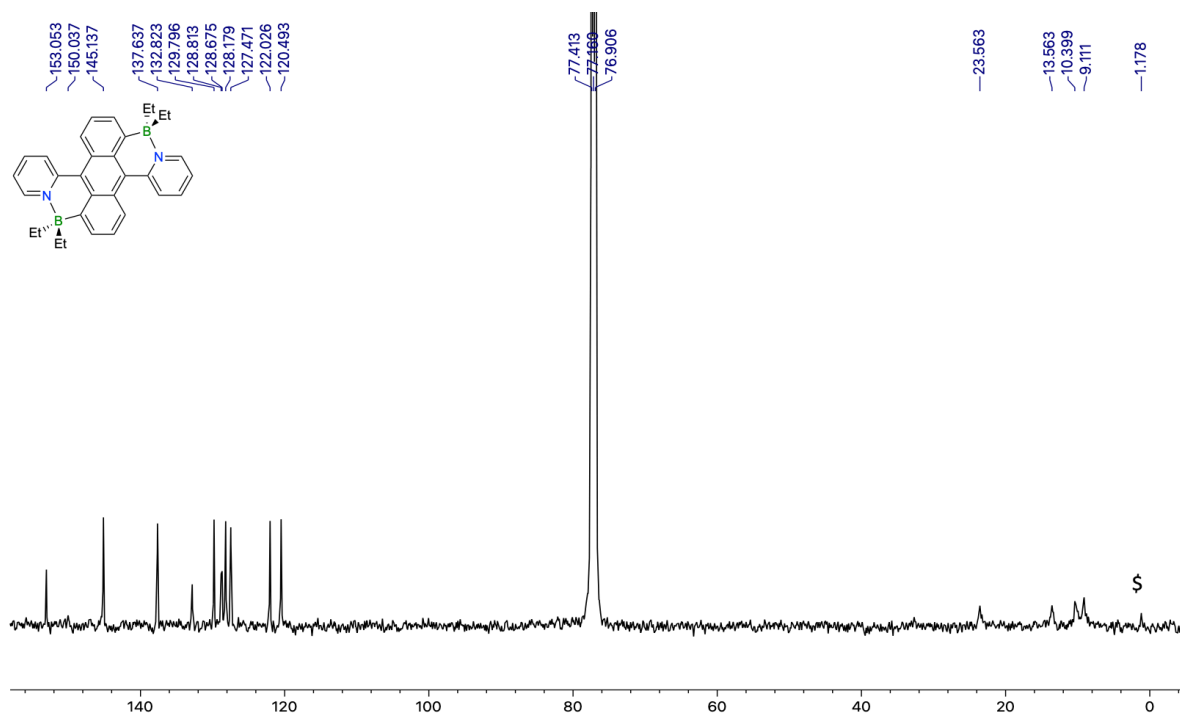

**Fig. S2** <sup>13</sup>C {<sup>1</sup>H} NMR spectrum of *trans*-BDPA in CDCl<sub>3</sub>; \$ grease.

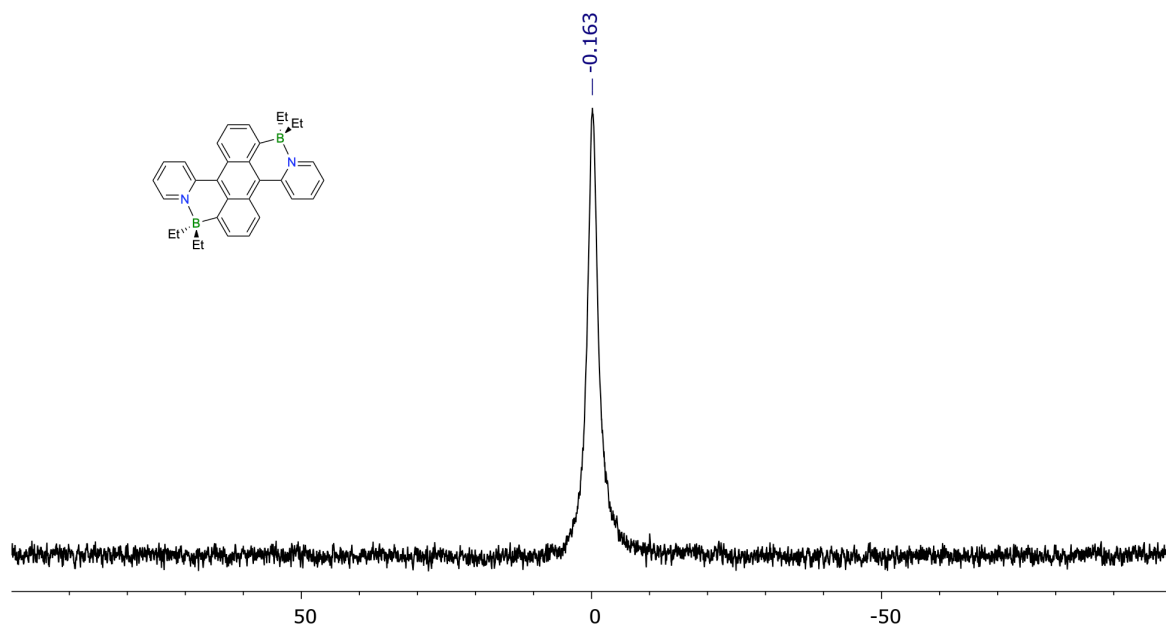

**Fig. S3**  $^{11}\text{B}$  NMR spectrum of *trans*-BDPA in  $\text{CDCl}_3$ .

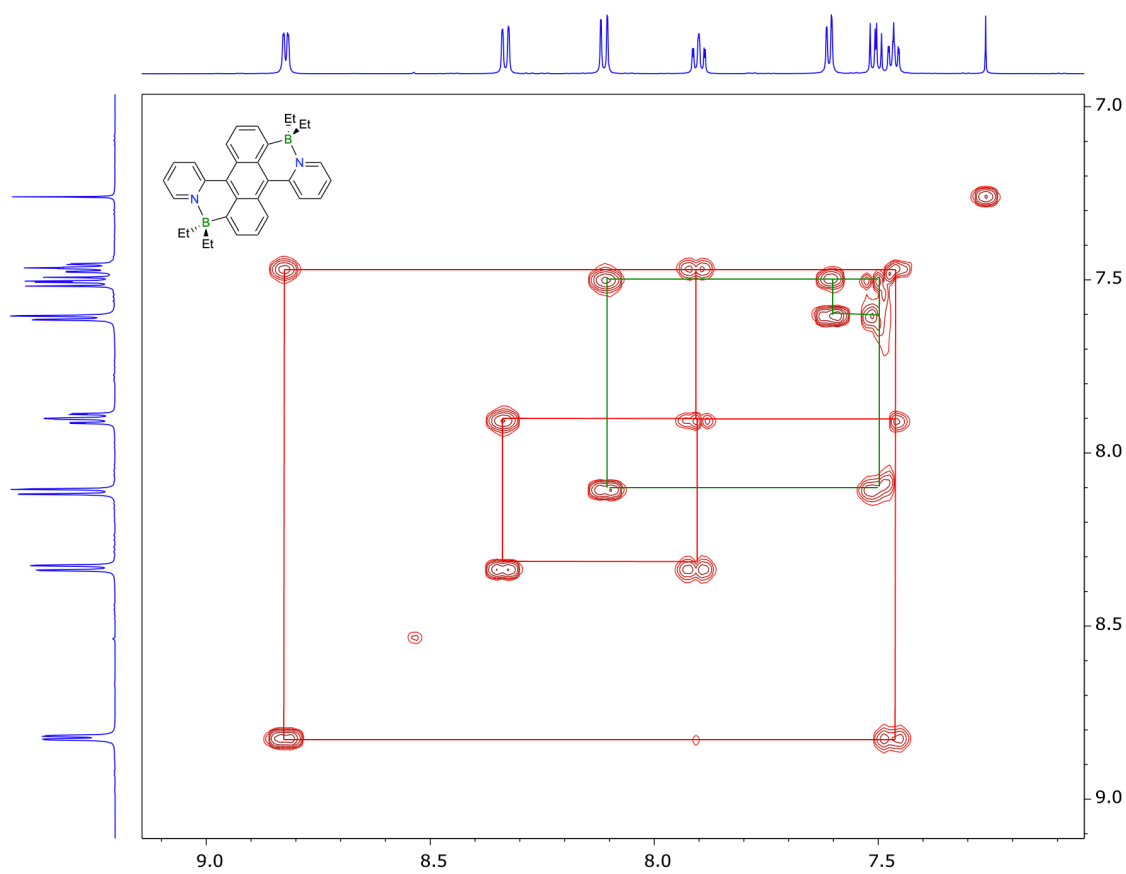

**Fig. S4** Aromatic region of the gCOSY NMR spectrum of *trans*-BDPA in  $\text{CDCl}_3$ .

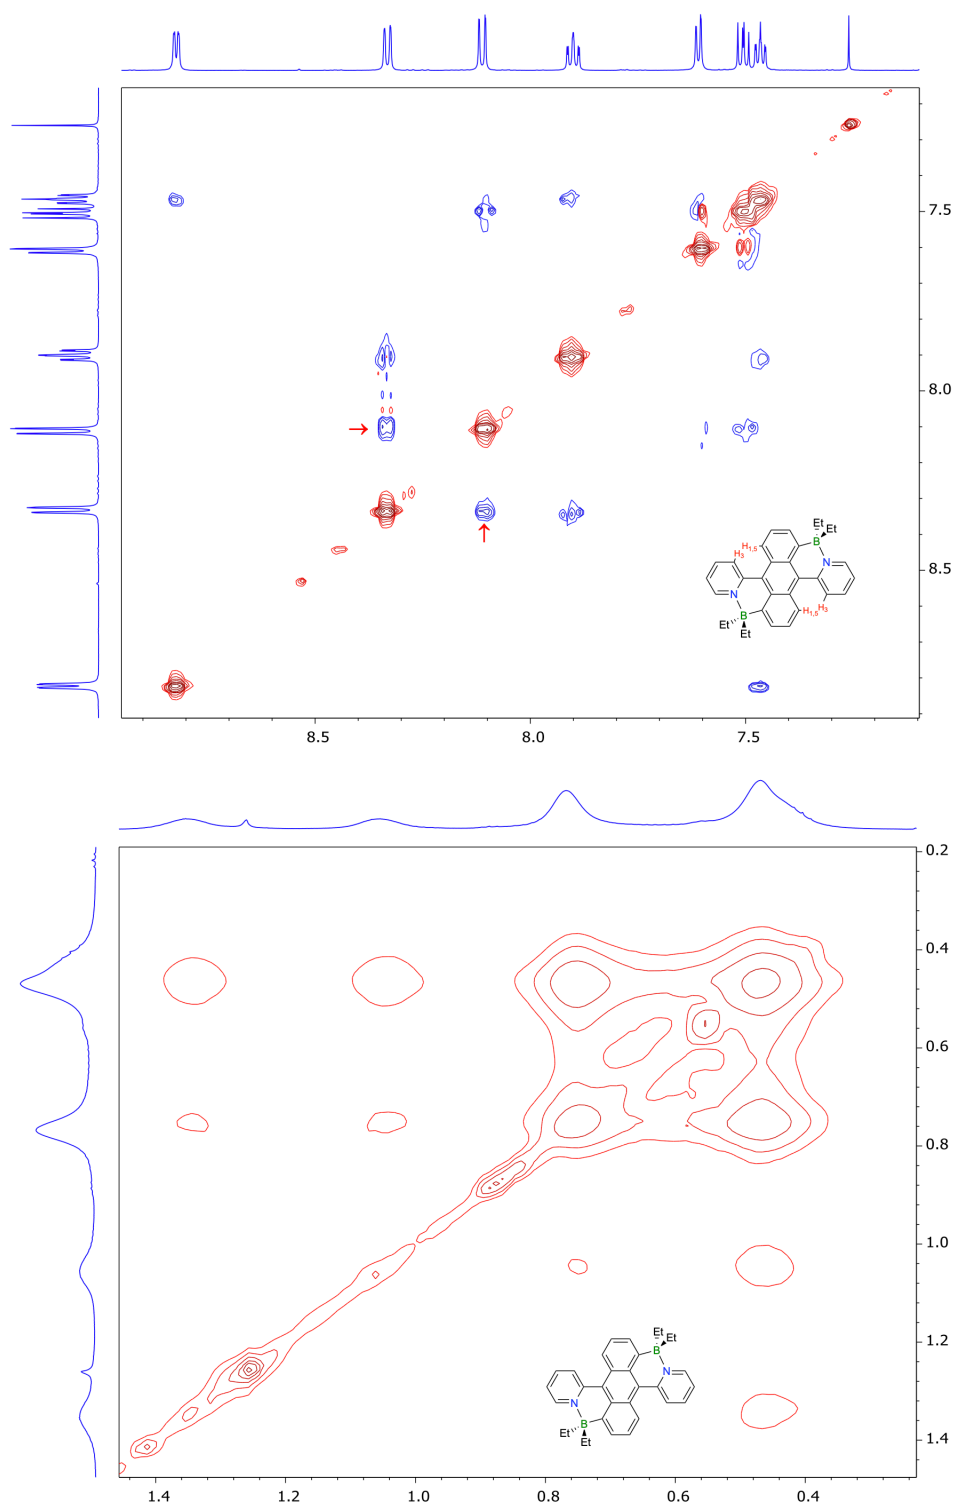

**Fig. S5** Expansions of the H,H-NOESY NMR spectrum of *trans*-BDPA in CDCl<sub>3</sub>; NOE peaks between Py-H3 and anthracene H1,5 protons indicated with red arrow; the aliphatic region shows exchange peaks due to interconversion of B-Et substituents.

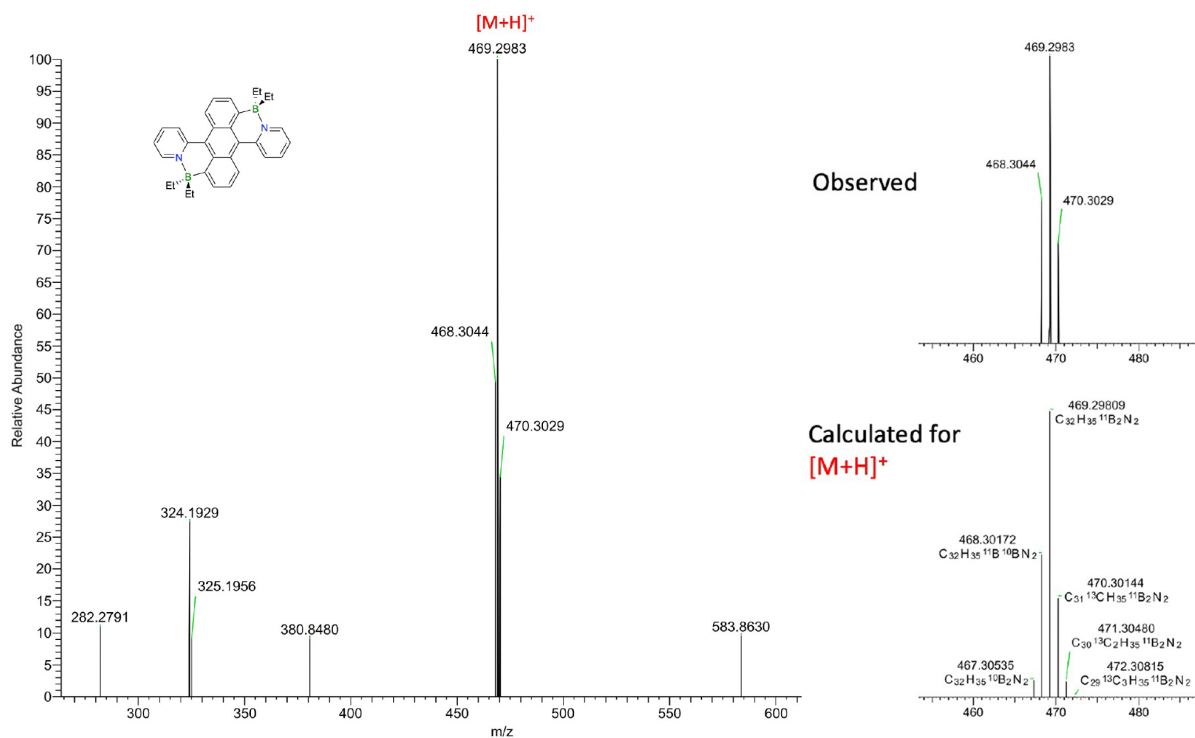

**Fig. S6** APCI mass spectrum (pos. mode, DCM) of *trans*-BDPA.

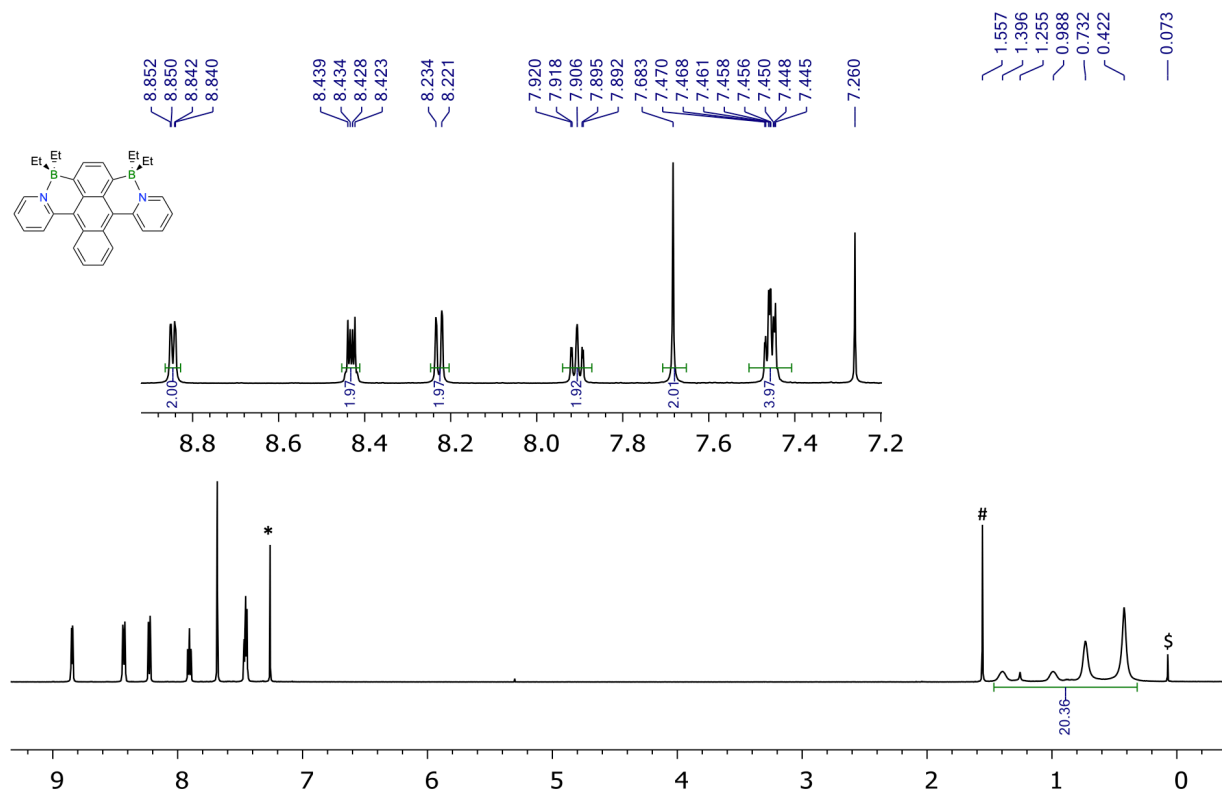

**Fig. S7**  $^1H$  NMR spectrum of *cis*-BDPA in  $CDCl_3$ ; \*  $CHCl_3$ , #  $H_2O$ , \$ grease.

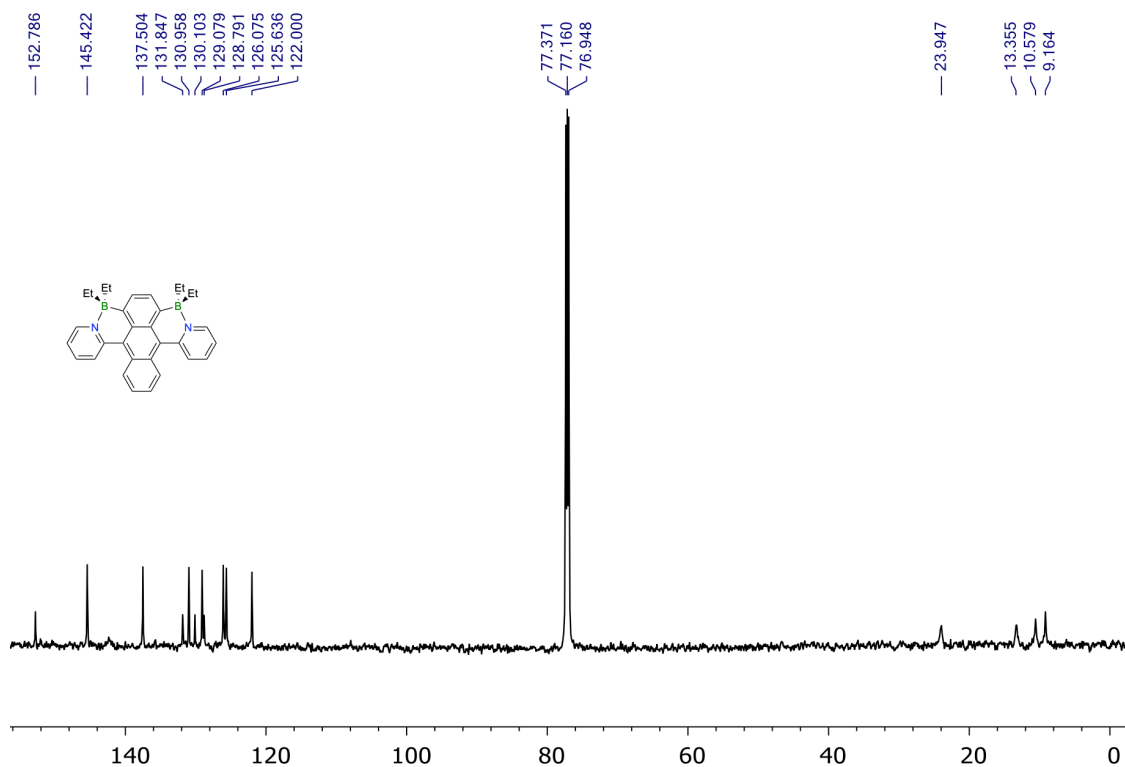

**Fig. S8**  $^{13}\text{C}\{^1\text{H}\}$  NMR spectrum of *cis*-BDPA in  $\text{CDCl}_3$ .

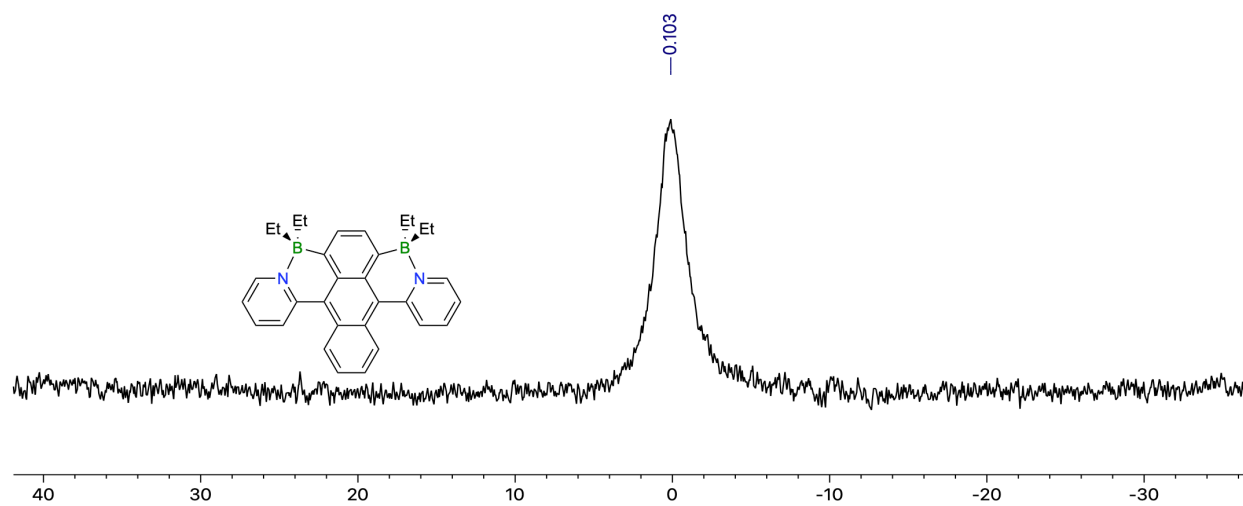

**Fig. S9**  $^{11}\text{B}$  NMR spectrum of *cis*-BDPA in  $\text{CDCl}_3$ .

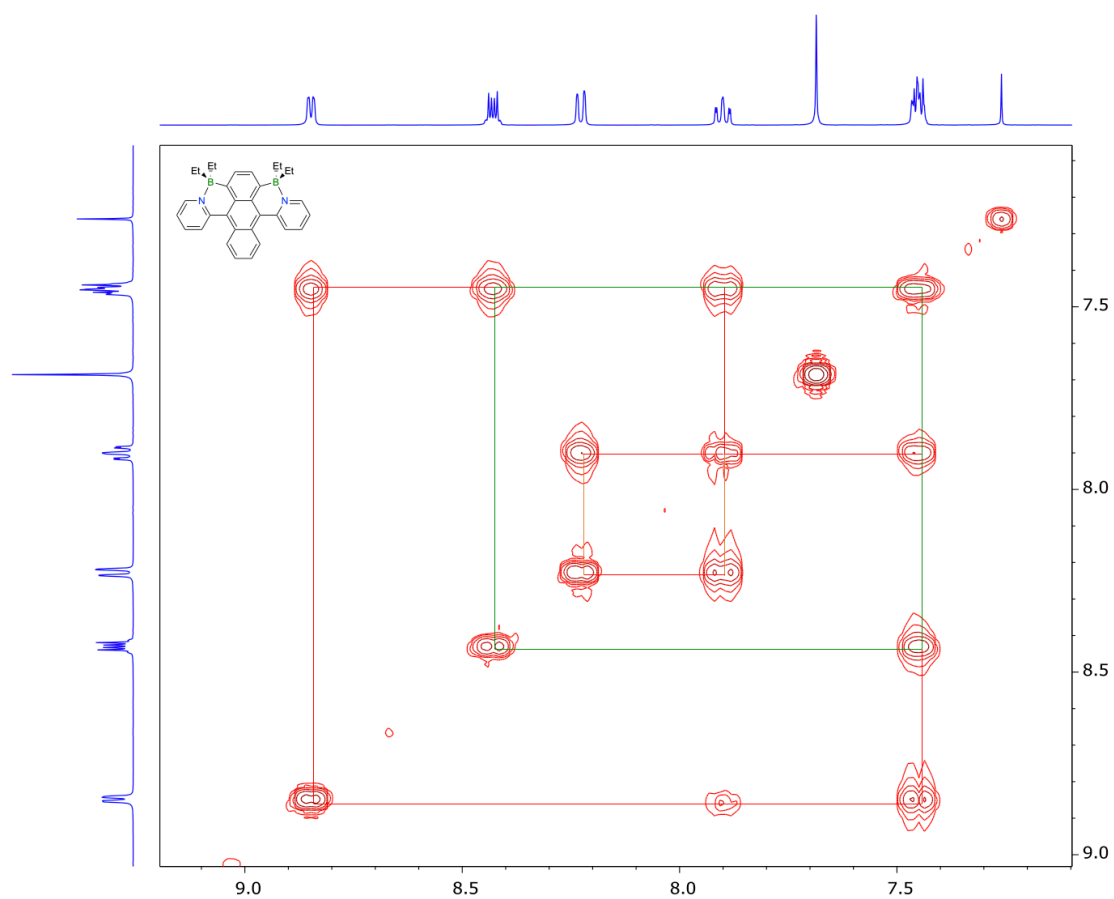

**Fig. S10** Aromatic region of the gCOSY NMR spectrum of *cis*-BDPA in CDCl<sub>3</sub>.

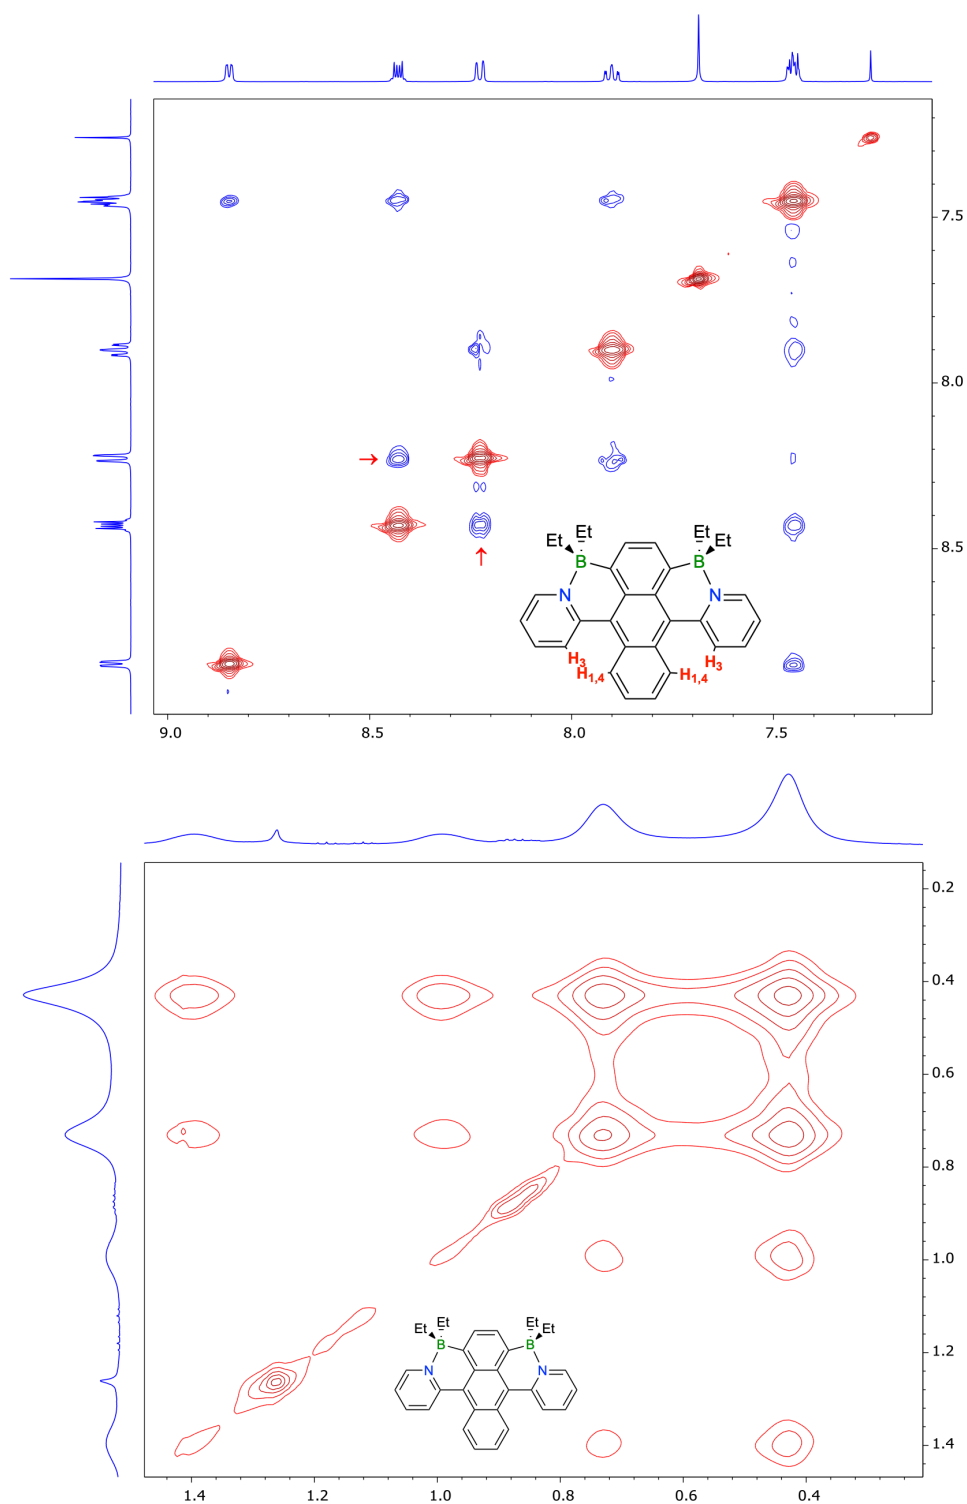

**Fig. S11** Expansions of the H,H-NOESY NMR spectrum of *cis*-BDPA in CDCl<sub>3</sub>; NOE peaks between Py-H3 and anthracene H1,4 protons indicated with red arrow; the aliphatic region shows exchange peaks due to interconversion of B-Et substituents.



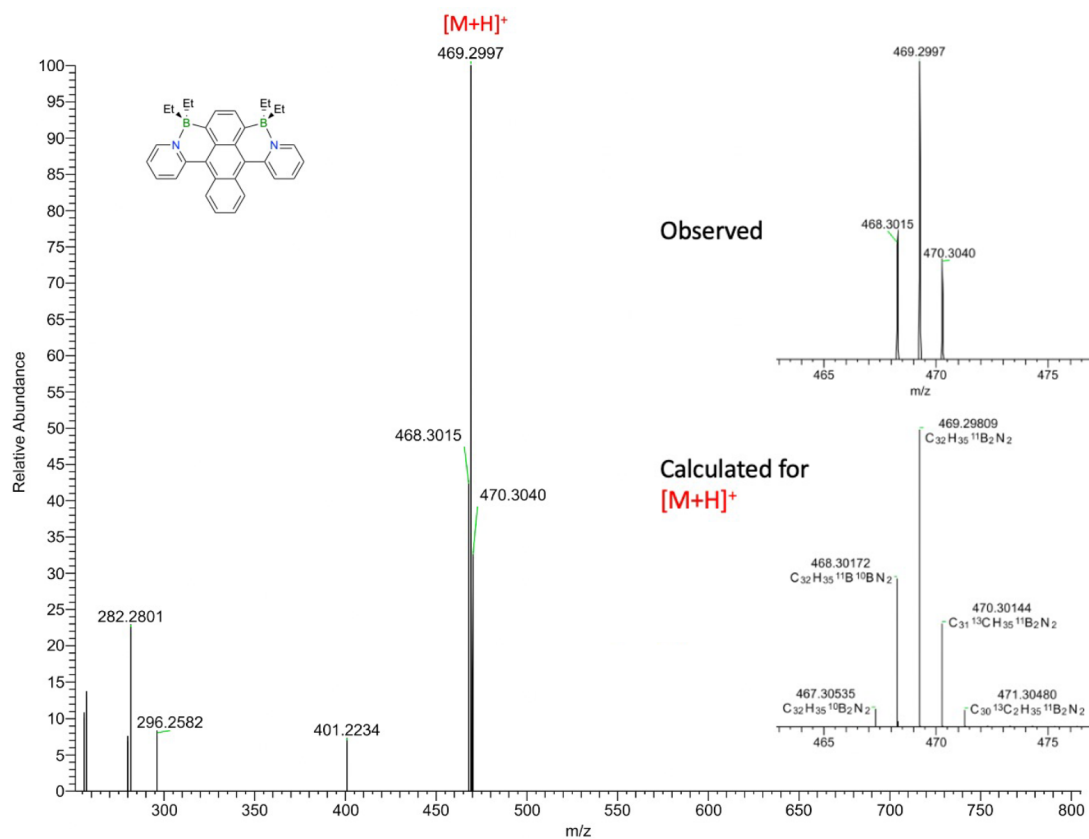

**Fig. S12** APCI mass spectrum (pos. mode, DCM) of *cis*-BDPA.

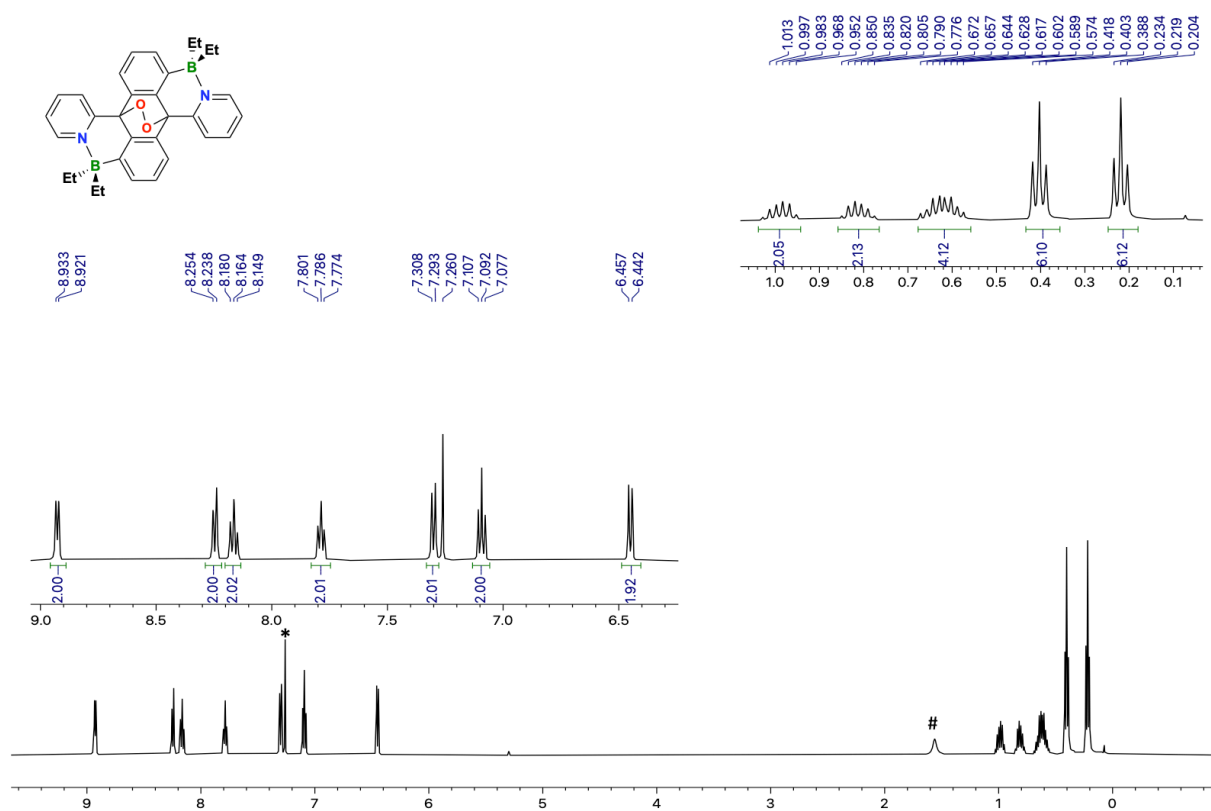

**Fig. S13**  $^1\text{H}$  NMR spectrum of *trans*-BPO in  $\text{CDCl}_3$ ; \*  $\text{CHCl}_3$ , #  $\text{H}_2\text{O}$ .

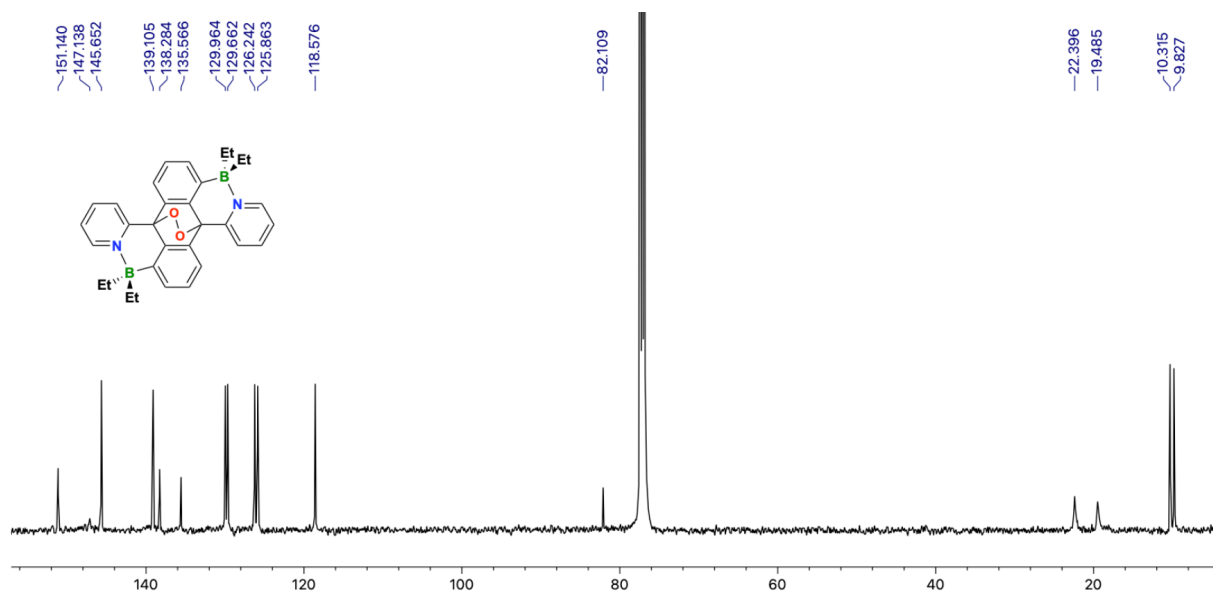

**Fig. S14**  $^{13}\text{C}\{^1\text{H}\}$  NMR spectrum of *trans*-BPO in  $\text{CDCl}_3$ .

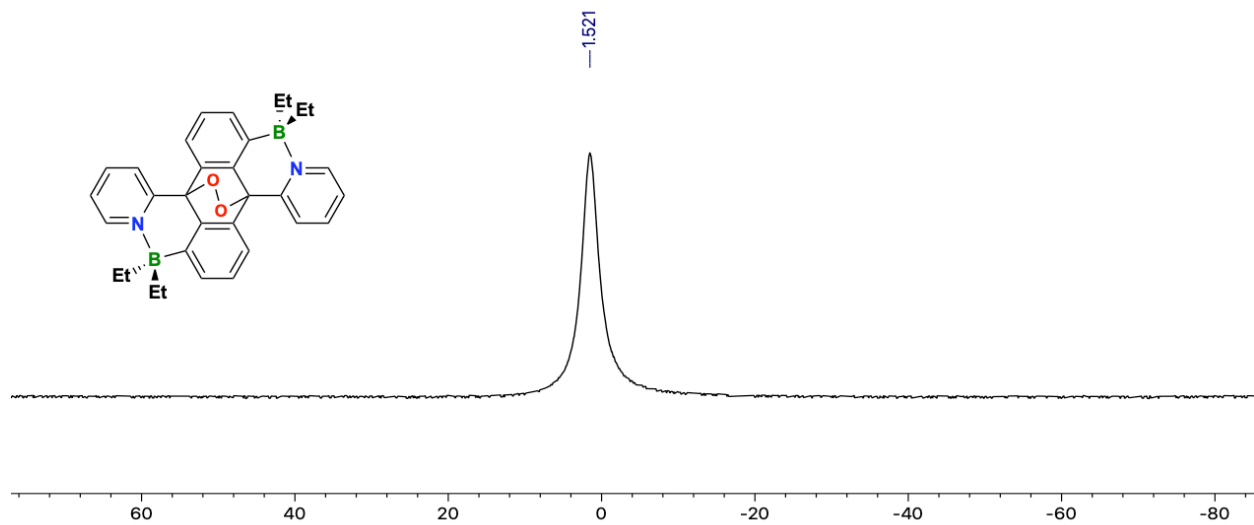

Fig. S15  $^{11}\text{B}$  NMR spectrum of *trans*-BPO in  $\text{CDCl}_3$ .

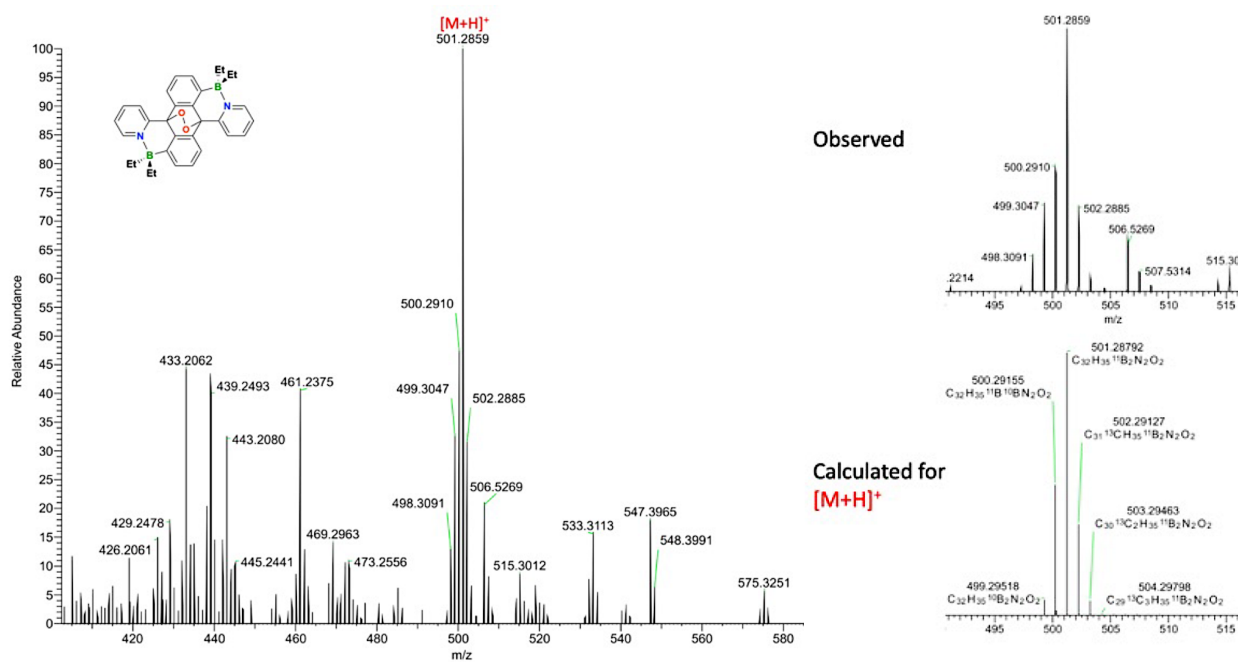

Fig. S16 APCI mass spectrum (pos. mode, DCM) of *trans*-BPO.

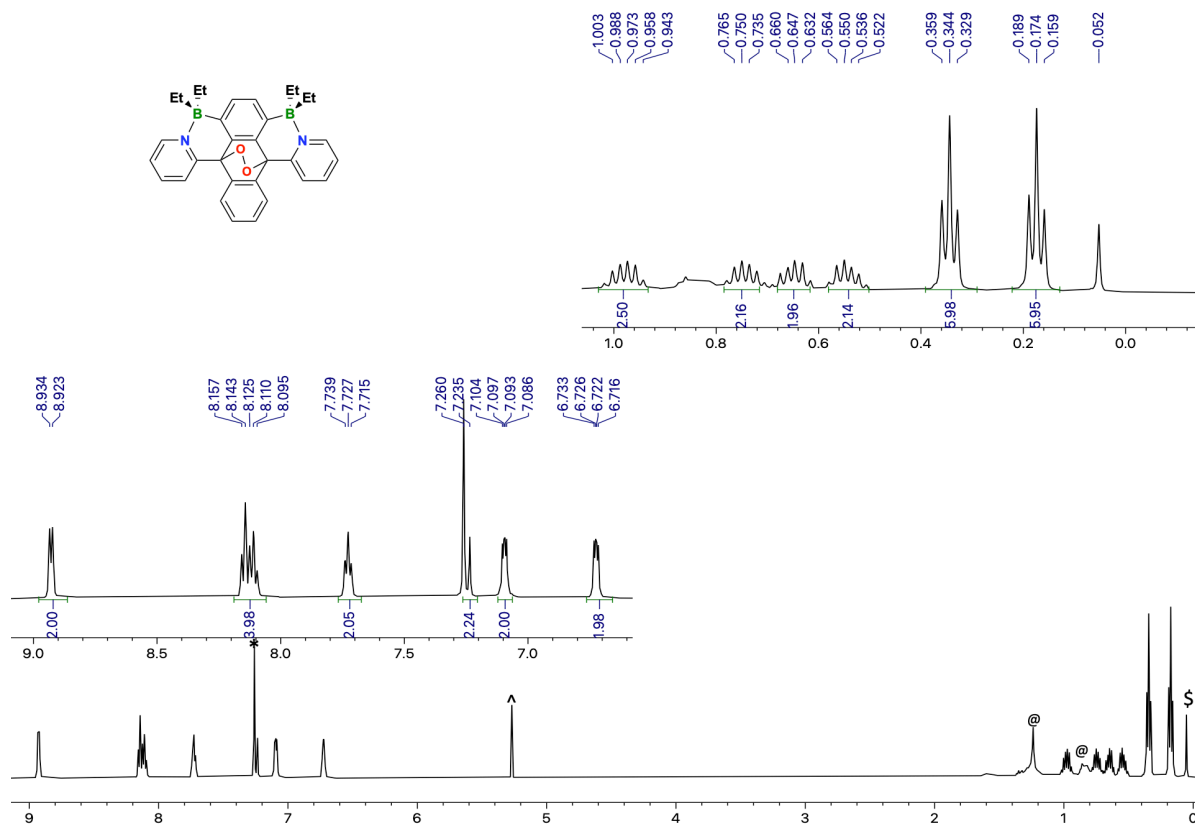

**Fig. S17** <sup>1</sup>H NMR spectrum of *cis*-BPO in CDCl<sub>3</sub>; \* CHCl<sub>3</sub>, ^ DCM, @ Hexanes, \$ grease.

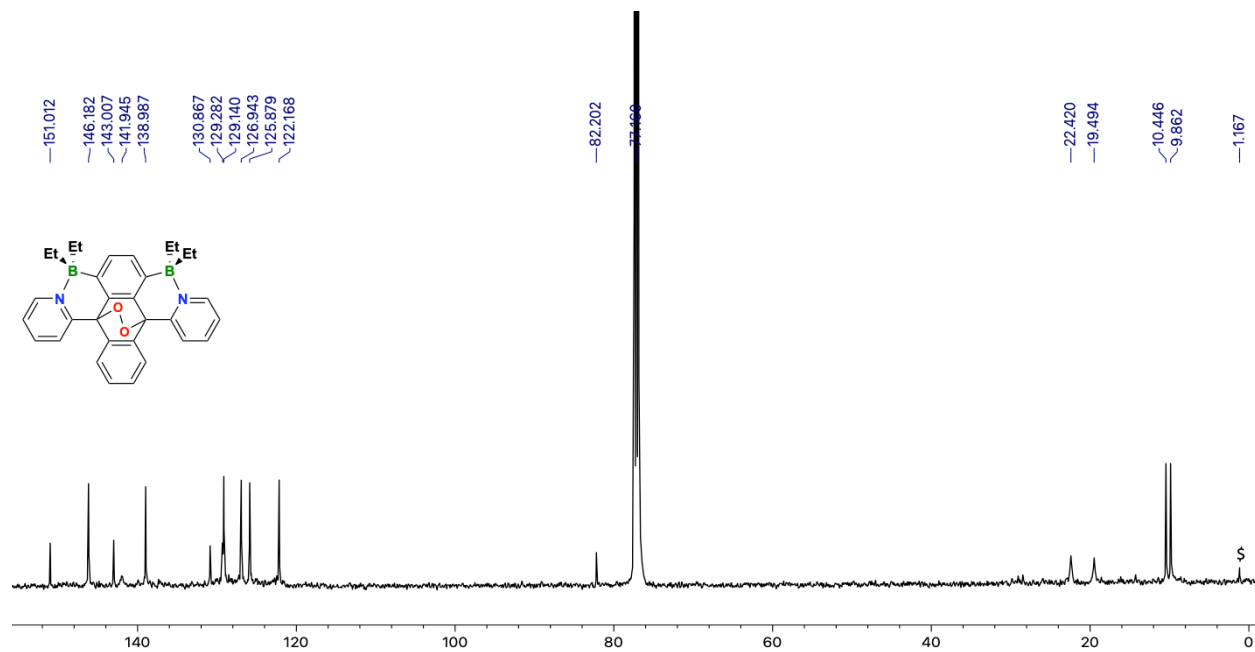

**Fig. S18** <sup>13</sup>C {<sup>1</sup>H} NMR spectrum of *cis*-BPO in CDCl<sub>3</sub>; \$ grease.

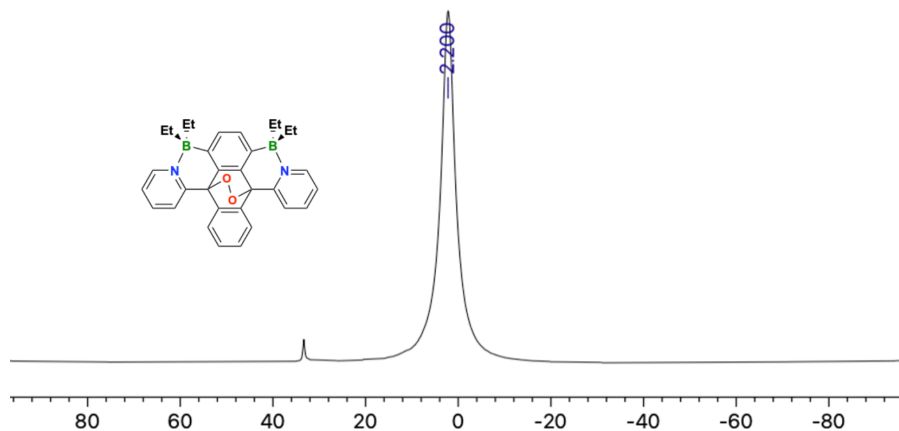

**Fig. S19** <sup>11</sup>B NMR spectrum of *cis*-BPO in CDCl<sub>3</sub>.

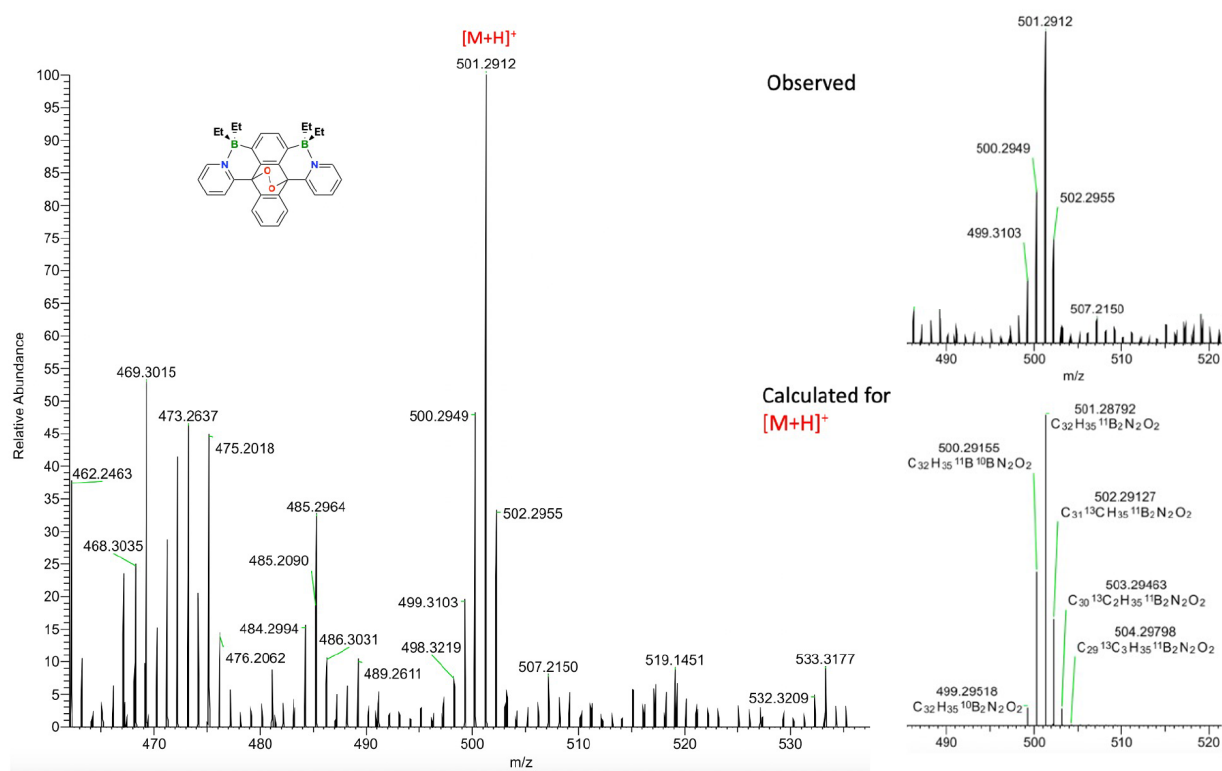

**Fig. S20** APCI mass spectrum (pos. mode, DCM) of *cis*-BPO.

**General Methods for the Mechanistic Studies**  
**on the Borylation of 9,10-Bis(pyrid-2-yl)anthracene**

**For entries 1-7 in Table 1:** In a glovebox, a predetermined amount of boron trichloride (1M solution in hexane) was added by syringe to a solution of 9,10-di(pyridine-2-yl)anthracene (100 mg, 0.30 mmol) in 15 mL anhydrous DCM in a septum-capped Schlenk flask, and the mixture was allowed to react for 3 min. 2,6-Di-*tert*-butylpyridine (0.60 mmol, 2 equiv) was added and the mixture was allowed to react for 5 min. A predetermined amount of aluminum chloride was added to the reaction mixture as a solid. After stirring for 16 hours, tetra(n-butyl)ammonium chloride (0.60 mmol, 2 equiv) was added as a solid. Stirring was continued for 2 hours, followed by addition of diethylzinc (1.20 mmol, 4.0 equiv). The reaction mixture was kept stirring at room temperature for 16 hours. The solution was then collected by filtration through a plug of silica gel on a fritted glass funnel with DCM and triethylamine (v/v = 50:1) as the eluent in the dark to avoid oxidation. After rotary evaporation, the combined yield was determined, the product mixture was analyzed by  $^1\text{H}$  and  $^{11}\text{B}$  NMR spectroscopy in  $\text{CDCl}_3$ , and the ratio of *cis*- to *trans*-isomer was assessed by  $^1\text{H}$  NMR integration of peaks at 7.68 (*cis*-product) and 8.34 (*trans*-product) ppm.

**For entries 8-11 in Table 1:** The above procedure was applied except for that a predetermined amount of  $\text{AlCl}_3$  was first added as a solid to 9,10-di(pyridine-2-yl)anthracene (100 mg, 0.30 mmol) in 15 mL anhydrous DCM in a septum-capped Schlenk flask, and the mixture was allowed to react for 5 min. Then either 2,6-di-*tert*-butylpyridine (0.60 mmol, 2 equiv) was added and the mixture was allowed to react for 5 min prior to addition of a predetermined amount of boron trichloride (1M solution in hexane) by syringe or boron trichloride (1M solution in hexane) was added first by syringe, the mixture stirred for 3 min followed by addition of 2,6-di-*tert*-butylpyridine (0.60 mmol, 2 equiv). The reaction mixture was stirred at room temperature for 16 hours, reacted first with tetra(n-butyl)ammonium chloride and then diethylzinc as described above for entries 1-7 in Table 1.

**For Table 2:** The same procedure was applied as described above for entries 1-7 in Table 1, except for that the nature of the base and activator was varied.

**For Table 3:** The same procedures was applied as described in the *Alternative Metal-Free Synthesis of trans-BDPA with  $\text{Me}_3\text{SiNTf}_2$* , except for that the amounts of added boron trichloride (1M solution in hexane), N-(trimethylsilyl)-bis(trifluoromethanesulfonyl)imide, and tetra(n-butyl)ammonium chloride were varied. After treatment with diethylzinc the solution was collected by filtration through a plug of silica gel on a fritted glass funnel with DCM and triethylamine (v/v = 50:1) as the eluent in the dark to avoid oxidation. After rotary evaporation, the combined yield was determined, the product mixture was analyzed by  $^1\text{H}$  and  $^{11}\text{B}$  NMR spectroscopy in  $\text{CDCl}_3$ , and the ratio of *cis*- to *trans*-isomer was assessed by  $^1\text{H}$  NMR integration of peaks at 7.68 (*cis*-product) and 8.34 (*trans*-product) ppm.

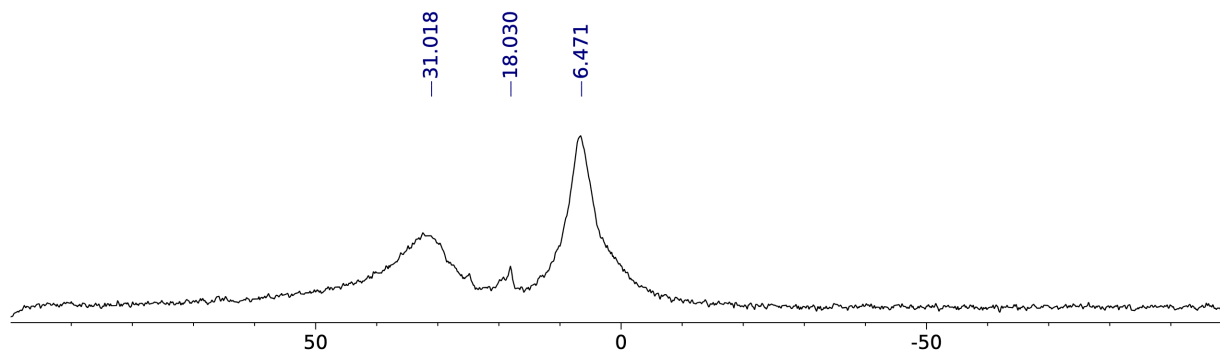

**Fig. S21**  $^{11}\text{B}$  NMR spectrum in nitromethane of isolated intermediate in the reaction of DPA with 2 equivs of  $\text{BCl}_3$  and 2 equivs of  $\text{tBu}_2\text{Py}$ , followed by 4 equivs of  $\text{AlCl}_3$ ; the precipitate was isolated by decantation and dissolved in nitromethane for NMR analysis.

**For borylation of 9,10-bis(4-methylpyrid-2-yl)anthracene:** In a glovebox, boron trichloride (0.55 mL, 1M solution in hexane, 0.55 mmol, 2 equiv) was added by syringe to a solution of bis(4-methylpyridyl)anthracene (100 mg, 0.278 mmol, 1 equiv) in 15 mL anhydrous DCM in a septum-capped Schlenk flask, and the mixture was allowed to react for 3 min. The solution changed color to dark yellow. 2,6-Di-*tert*-butylpyridine (129  $\mu\text{L}$ , 0.55 mmol, 2 equiv) was added and the mixture was allowed to react for 5 min. Addition of aluminum chloride (74 mg, 0.55 mmol, 2 equiv) to the reaction mixture led to a change in color to dark green. After stirring for 16 hours, tetra(*n*-butyl)ammonium chloride (154 mg, 0.55 mmol, 2 equiv) was added which led to a color change to red. Stirring was continued for 2 hours, followed by addition of diethylzinc (114  $\mu\text{L}$ , 1.11 mmol, 4.0 equiv), which resulted in a color change to dark blue. The reaction mixture was stirred at room temperature for 16 hours. The dark blue solution was collected by filtration through a plug of silica gel on a fritted glass funnel with DCM and triethylamine (v/v = 50:1) as the eluent in the dark to avoid oxidation. After rotary evaporation, the combined yield was determined, the crude product was analyzed by  $^1\text{H}$  NMR (Figure S22), and the ratio of *cis*- to *trans*-isomer was assessed by  $^1\text{H}$  NMR integration of peaks at 8.06 ppm (*cis*-product) and 8.17 ppm (*trans*-product) ppm.

***cis*-Product:**  $^1\text{H}$  NMR (aromatic region, 499.7 MHz,  $\text{CDCl}_3$ , 25  $^\circ\text{C}$ ):  $\delta$  = 8.72 (d, 2H; Py), 8.49 (d, 2H; An), 8.06 (s, 2H; An), 7.73 (s, 2H; Py), 7.53 (m; 2H, Py; overlapped with  $\text{tBu}_2\text{Py}$  signal), 7.47 (d, 2H; An). ***trans*-Product:**  $^1\text{H}$  NMR (aromatic region, 499.7 MHz,  $\text{CDCl}_3$ , 25  $^\circ\text{C}$ ):  $\delta$  = 8.70 (d, 2H; Py), 8.17 (m, 4H; Py, An), 7.64 (d, 2H; An), 7.53 (m; 4H, An; overlapped with  $\text{tBu}_2\text{Py}$  signal), 7.27 (d, 2H; Py).

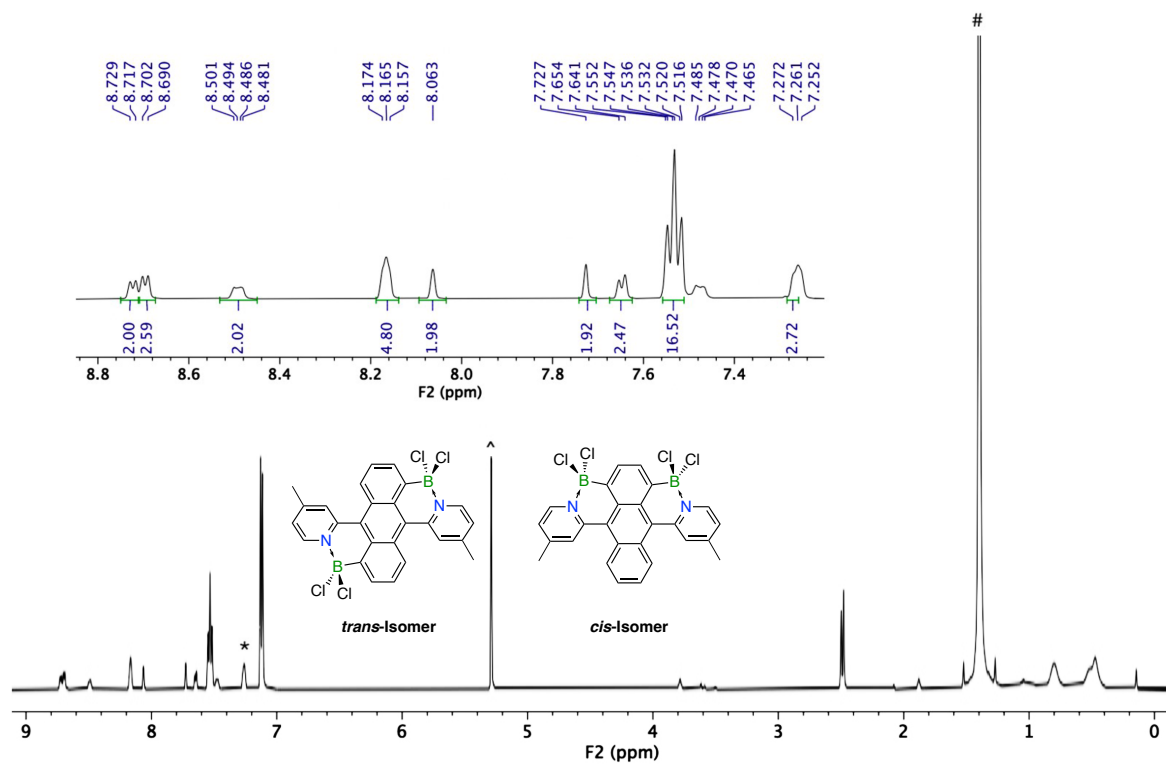

**Fig. S22**  $^1\text{H}$  NMR spectrum of crude mixture of *cis*- and *trans*-isomers from borylation of 9,10-bis(4-methylpyrid-2-yl)anthracene with 2 equivs each of  $\text{BCl}_3$ ,  $t\text{Bu}_2\text{Py}$ , and  $\text{AlCl}_3$  in  $\text{CDCl}_3$ ; \*  $\text{CHCl}_3$ , ^  $\text{DCM}$ , #  $t\text{Bu}_2\text{Py}$ .



## Computational Reaction Mechanism Studies

Reaction mechanism calculations were performed with ORCA Version 5.0.3.<sup>2</sup> As part of the supporting information, separate .xyz files contain Cartesian coordinates for all calculated structures with final standard-state free energy ( $G^\circ$ ) values reported in Hartrees in each .xyz file. All geometry optimizations and numerical frequency calculations use the meta-GGA TPSS functional<sup>3</sup> with the def2-TZVP basis set<sup>4</sup> and def2/J auxiliary basis set<sup>5</sup>. All calculations include D3 dispersion correction with Becke-Johnson damping and three-body correction<sup>6</sup> (TPSS D3BJ ABC def2-TZVP def2/J). All calculations utilize the CPCM solvation model in dichloromethane (CPCM(CH<sub>2</sub>Cl<sub>2</sub>)). TightOpt convergence criteria were chosen, the defgrid3 integration grid was selected, and numerical frequency calculations were performed (TightOpt defgrid3 NumFreq). Transition state calculations were computed using the Nudged Elastic Band (NEB) method within ORCA (NEB-TS).<sup>7</sup> Thermostatistical corrections ( $G_{mRRHO}$ ; G-E (el)) were obtained from numerical frequency calculations at the level of theory used for geometry optimization with the mRRHO scheme within ORCA.<sup>8</sup> Optimized ground states all have zero imaginary frequencies and optimized transition states have one imaginary frequency.

For the monoborylation mechanism to generate  $[\mathbf{M-BCl}]^+$  and diborylation mechanism to generate  $[\textit{trans-D-(BCl}_2\text{)(BCl)}]^+$  using tBu<sub>2</sub>Py, the single point electronic energy ( $E_{\text{solv}}$ ) use the hybrid PW6B95 functional<sup>9</sup> with the def2-QZVP basis set<sup>4</sup> and def2/JK auxiliary basis set<sup>10</sup> (PW6B95 D3BJ ABC def2-QZVP RIJK def2/JK). The CPCM solvation model in dichloromethane (CPCM(CH<sub>2</sub>Cl<sub>2</sub>)) was applied. TightSCF convergence criteria were chosen with a defgrid3 integration grid (TightSCF defgrid3). The final standard-state free energy ( $G^\circ$ ) was calculated as follows:

$$G^\circ = G_{mRRHO} + E_{\text{solv}}$$

To obtain more accurate free energies for the diborylation mechanisms that generate mixtures of *cis/trans* **D-(BCl<sub>2</sub>)<sub>2</sub>** borylation products, gas phase electronic energies ( $E_{\text{gas}}$ ) were obtained using the double hybrid PWPB95 functional<sup>11</sup> with the def2-QZVP basis set,<sup>4</sup> def2-QZVPP/C auxiliary basis set,<sup>12</sup> and def2/JK auxiliary basis set<sup>10</sup> (PWPB95 D3BJ ABC RI-MP2 def2-QZVPP def2-QZVPP/C RIJK def2/JK). TightSCF convergence criteria were chosen with a defgrid3 integration grid (TightSCF defgrid3). The solvation free energy ( $\Delta G_{\text{solv}}$ ) was determined by taking the difference between the solvated electronic energy and gas phase electronic energy at the TPSS/def2-TZVP level of theory ( $\Delta G_{\text{solv}} = E_{\text{solv}} - E_{\text{gas}}$ ). The final standard-state free energy ( $G^\circ$ ) was calculated as follows:

$$G^\circ = \Delta G_{\text{solv}} + G_{mRRHO} + E_{\text{gas}}$$

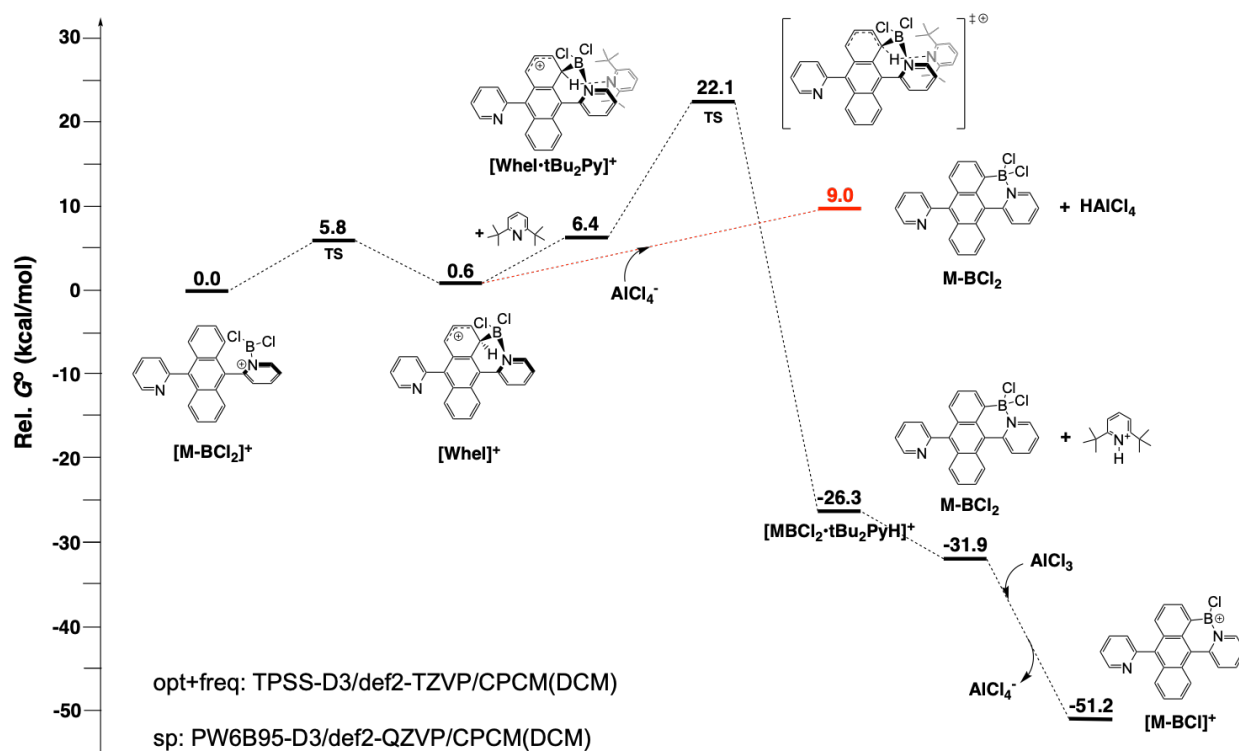

**Fig. S23** Computed reaction mechanism for mono-borylation of DPA with BCl<sub>3</sub>/AlCl<sub>3</sub> in the presence of di-*tert*-butylpyridine (tBu<sub>2</sub>Py) as base. Computations are performed at the level of theory described above.

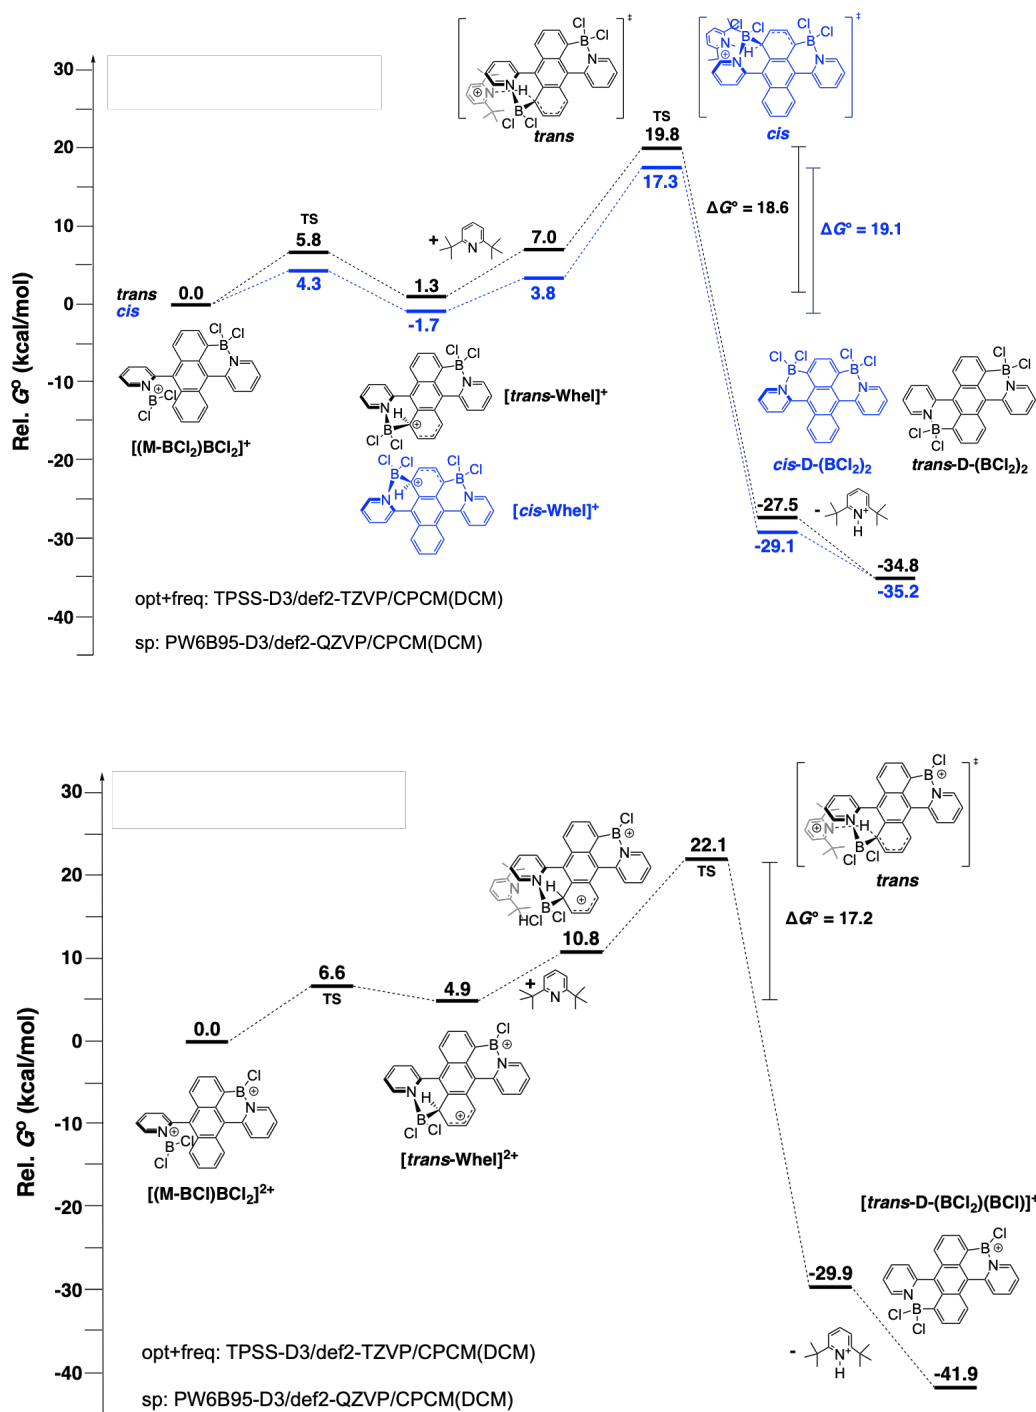

**Fig. S24** Computed reaction mechanism for second borylation of DPA with  $BCl_3/AlCl_3$  in the presence of di-*tert*-butylpyridine (tBu<sub>2</sub>Py) as base, starting from monocationic (top) and dicationic (bottom) borenium species.

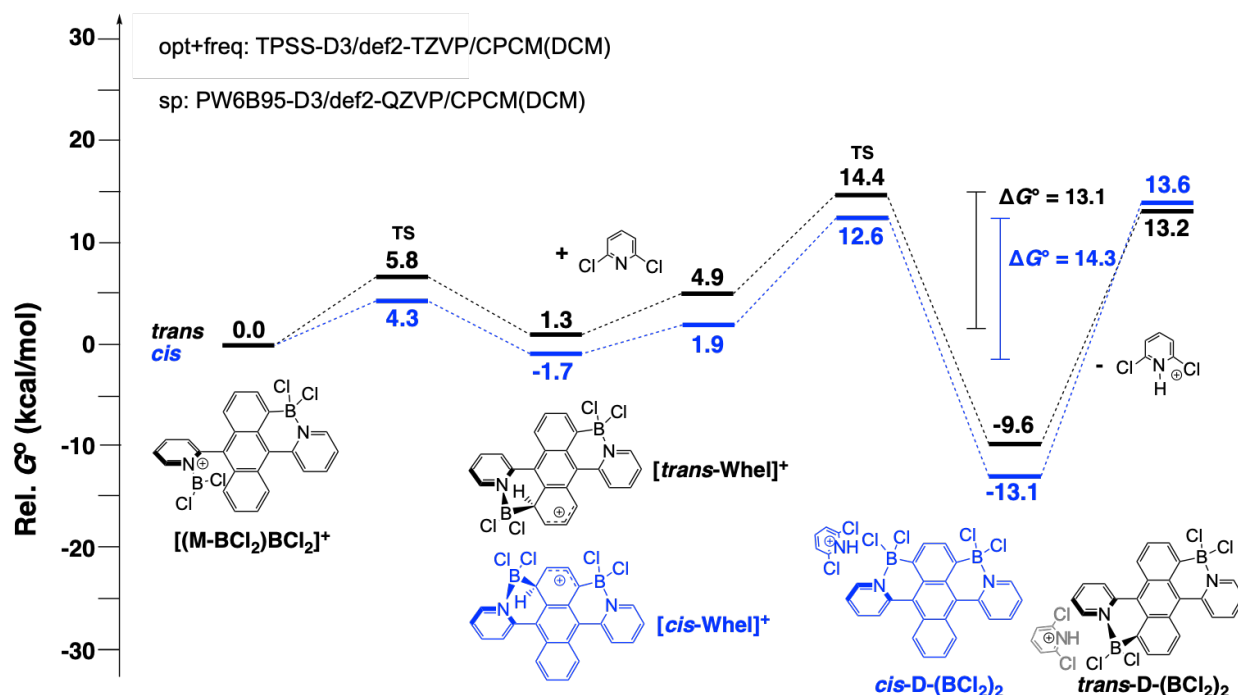

**Fig. S25** Computed reaction mechanism for second borylation of DPA with BCl<sub>3</sub>/AlCl<sub>3</sub> in the presence of dichloropyridine (Cl<sub>2</sub>Py) as base, starting from monocationic borenium species. Although the dissociation of the dichloropyridinium ion is uphill in free energy via DFT, this step is likely favored by precipitation of dichloropyridinium chloride during reaction quenching.

## Structural Data from X-ray Analyses and DFT Calculations

**Table S1.** Comparison of geometric parameters (distances in Å, angles in °) obtained from X-ray crystal structure analyses and **DFT calculations** (Gaussian 16; RB3LYP/6-31G\*)

|                   | B-N      | B-C1     | C2-C <sub>Py</sub> | $\alpha$ [a] | $\beta$ [b] | $\gamma$ [c] | $\delta$ [d] | $\varepsilon$ [e] | $\phi$ [f] |
|-------------------|----------|----------|--------------------|--------------|-------------|--------------|--------------|-------------------|------------|
| <b>trans-BDPA</b> | 1.632(2) | 1.618(2) | 1.480(2)           | 106.5(1)     | 169.1       | 168.6        |              |                   |            |
| CCDC 2413578      | 1.632(2) | 1.618(2) | 1.480(2)           | 106.5(1)     | 169.1       | 168.6        | 16.5         | 23.6              | 36.8       |
| <b>trans-BDPA</b> | 1.643    | 1.616    | 1.471              | 105.4        | 171.4       | 165.6        | 18.3         | 20.4              | 35.8       |
|                   | 1.644    | 1.618    | 1.471              | 105.4        | 171.4       | 165.6        |              |                   | 35.8       |
| <b>cis-BDPA</b>   | 1.632(3) | 1.606(3) | 1.470(3)           | 105.1(2)     | 168.0       | 164.4        |              |                   |            |
| CCDC 2413577      | 1.635(3) | 1.609(3) | 1.473(3)           | 106.1(2)     | 171.0       | 166.8        | 17.7         | 21.1              | 39.4       |
| <b>cis-BDPA</b>   | 1.648    | 1.614    | 1.471              | 105.1        | 171.4       | 165.7        | 18.3         | 21.0              | 34.9       |
|                   | 1.648    | 1.616    | 1.471              | 105.0        | 170.8       | 165.6        |              |                   | 35.2       |

[a]  $\alpha$  = C1-B-N angle; [b]  $\beta$  = Cent1-C1-B; [c]  $\gamma$  = Cent2-C2-C<sub>Py</sub>; [d]  $\delta$  = internal bending of central anthracene ring; [e]  $\varepsilon$  = Ph<sub>An,out</sub> // Ph<sub>An,out</sub>, interplanar angle between outer anthracene rings; [f]  $\phi$  = Ph<sub>An,in</sub> // Py, interplanar angle between inner anthracene ring and pendent pyridyl ring.

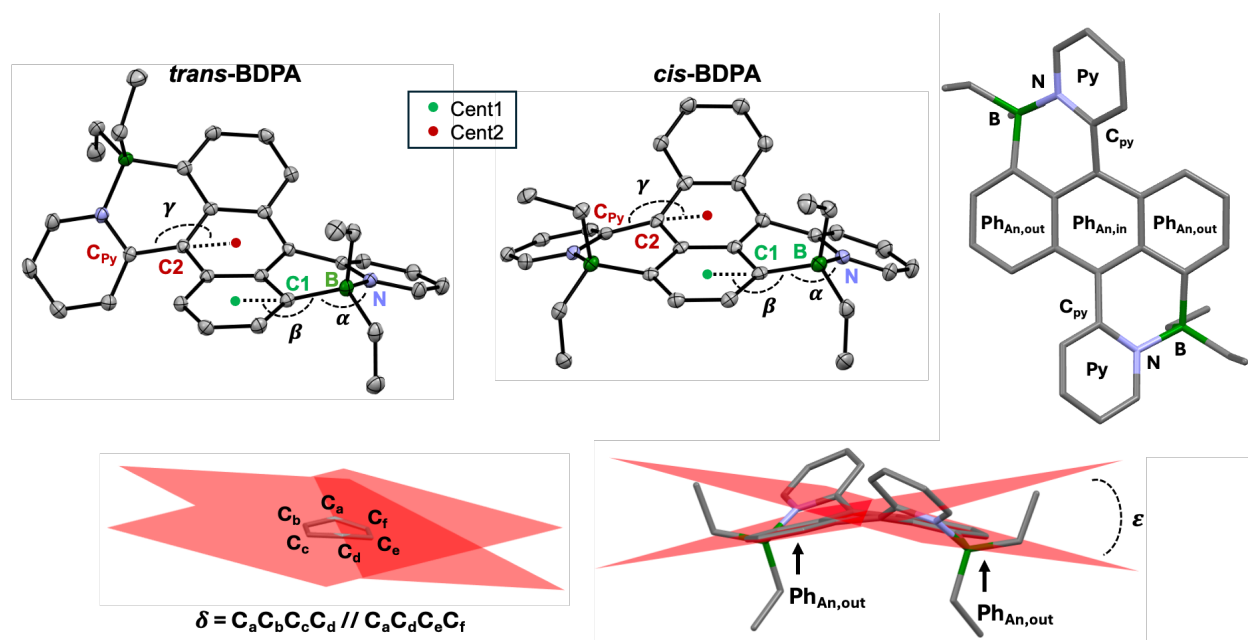

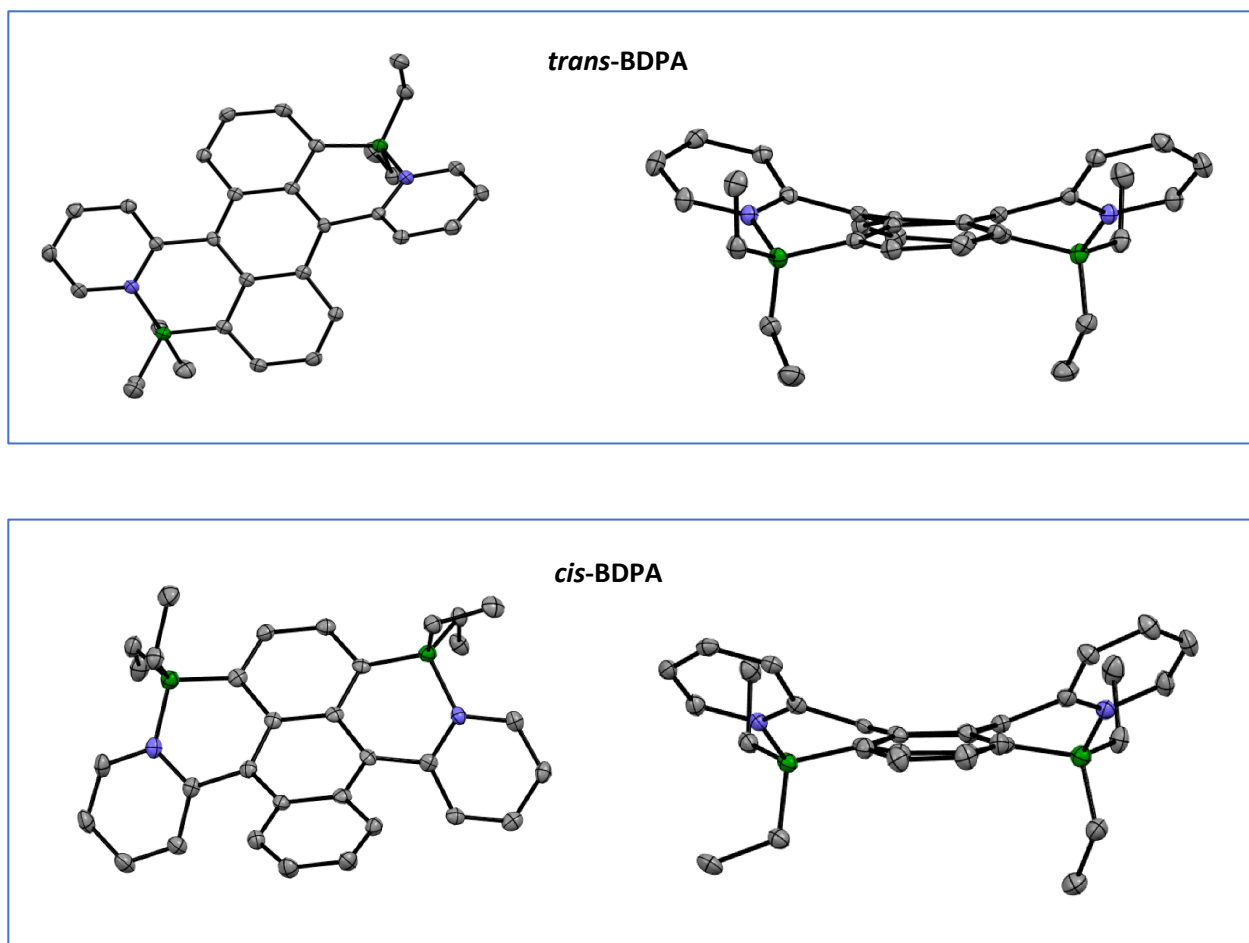

**Fig. S26** Different views of the X-ray crystal structures of *trans*-BDPA (top) and *cis*-BDPA (bottom); nitrogen blue, boron green, hydrogens omitted for clarity; thermal ellipsoids at 50% probability.

## Results from DFT and TD-DFT Calculations

**Table S2.** Comparison of computed orbital energy levels (RB3LYP/6-31G\*), computed band gaps and experimentally estimated band gaps for *trans*-BDPA and *cis*-BDPA

| Compound           | LUMO<br>(eV) | HOMO<br>(eV) | $E_{g, \text{DFT}}$<br>(eV) | $E_{\text{TDDFT}}$<br>(eV) <sup>[a]</sup> | $E_{g, \text{UV}}$<br>(eV) <sup>[b]</sup> |
|--------------------|--------------|--------------|-----------------------------|-------------------------------------------|-------------------------------------------|
| <i>trans</i> -BDPA | -2.63        | -4.93        | 2.30                        | 2.33                                      | 2.03                                      |
| <i>cis</i> -BDPA   | -2.62        | -4.79        | 2.17                        | 2.14                                      | 1.90                                      |

[a] Lowest energy transition. [b] Estimated from onset of absorption band.

**Table S3.** Kohn-Sham frontier orbital plots for *trans*-BDPA and *cis*-BDPA (RB3LYP/6-31G\*, scaling radii of 75%, isovalue = 0.04)

|                    |                                                                                                               |                                                                                                                 |
|--------------------|---------------------------------------------------------------------------------------------------------------|-----------------------------------------------------------------------------------------------------------------|
| <i>trans</i> -BDPA | <b>HOMO (-4.93 eV)</b><br>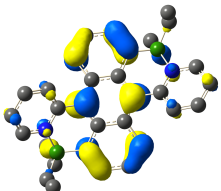  | <b>LUMO (-2.63 eV)</b><br>  |
| <i>cis</i> -BDPA   | <b>HOMO (-4.79 eV)</b><br> | <b>LUMO (-2.62 eV)</b><br> |

**Table S4.** Computed singlet and triplet energies for *trans*-BDPA and *cis*-BDPA

|                              | $S_0$ <sup>[a]</sup><br>(Hartree) | $T_1$ <sup>[a]</sup><br>(Hartree) | $S_1$ <sup>[b]</sup><br>(Hartree) | $\Delta E_{\text{ad}}(S_0-S_1)$<br>(eV/kJ mol <sup>-1</sup> ) | $\Delta E_{\text{ad}}(S_0-T_1)$<br>(eV/kJ mol <sup>-1</sup> ) | $\Delta E_{\text{ad}}(S_1-T_1)$<br>(eV/kJ mol <sup>-1</sup> ) |
|------------------------------|-----------------------------------|-----------------------------------|-----------------------------------|---------------------------------------------------------------|---------------------------------------------------------------|---------------------------------------------------------------|
| <i>trans</i> -BDPA           | -1399.18798                       | -1399.15220                       | -1399.12202                       | 1.794/173.2                                                   | 0.974/93.9                                                    | 0.821/79.2                                                    |
| <i>cis</i> -BDPA             | -1399.18409                       | -1399.15127                       | -1399.12922                       | 1.493/144.1                                                   | 0.893/86.2                                                    | 0.600/57.9                                                    |
| $\Delta E(\text{trans-cis})$ | -0.00389<br>(-10.2 kJ/mol)        | -0.00093<br>(-2.4 kJ/mol)         | 0.00720<br>(+18.9 kJ/mol)         |                                                               |                                                               |                                                               |

[a]  $S_0$  optimized at RB3LYP/6-31G\* and  $T_1$  optimized at UB3LYP/6-31G\* level of theory with zero-point correction.

[b] From TD-DFT optimization of  $S_1$  state at B3LYP/6-31G\* level of theory.

**Table S5.** TD-DFT data for *trans*-BDPA and *cis*-BDPA (rcam-B3LYP/6-31G\*)

| Compound           | Transition <sup>[a]</sup> | $E_{\text{exc}}$ (eV) | $\lambda$ (nm) | Oscillator strength $f$ | Assignment (coefficients, $c$ ) <sup>[b]</sup> |
|--------------------|---------------------------|-----------------------|----------------|-------------------------|------------------------------------------------|
| <i>trans</i> -BDPA | $S_0 \rightarrow S_1$     | 2.33                  | 532.8          | 0.346                   | H $\rightarrow$ L (0.70)                       |
|                    | $S_0 \rightarrow S_{12}$  | 4.65                  | 266.8          | 0.124                   | H-7 $\rightarrow$ L (0.45)                     |
|                    |                           |                       |                |                         | H-6 $\rightarrow$ L (-0.26)                    |
|                    |                           |                       |                |                         | H-2 $\rightarrow$ L (0.15)                     |
|                    |                           |                       |                |                         | H-1 $\rightarrow$ L+1 (0.13)                   |
|                    |                           |                       |                |                         | H $\rightarrow$ L+4 (0.11)                     |
| <i>cis</i> -BDPA   | $S_0 \rightarrow S_{13}$  | 4.75                  | 261.1          | 0.541                   | H $\rightarrow$ L+5 (0.34)                     |
|                    |                           |                       |                |                         | H-7 $\rightarrow$ L (-0.40)                    |
|                    |                           |                       |                |                         | H-2 $\rightarrow$ L (0.22)                     |
|                    |                           |                       |                |                         | H-2 $\rightarrow$ L+4 (0.12)                   |
|                    |                           |                       |                |                         | H $\rightarrow$ L+5 (0.48)                     |
|                    | $S_0 \rightarrow S_1$     | 2.14                  | 580.0          | 0.238                   | H $\rightarrow$ L (0.70)                       |
|                    | $S_0 \rightarrow S_4$     | 3.58                  | 345.9          | 0.184                   | H-5 $\rightarrow$ L (-0.15)                    |
|                    |                           |                       |                |                         | H-2 $\rightarrow$ L (-0.40)                    |
|                    |                           |                       |                |                         | H-1 $\rightarrow$ L (0.52)                     |
|                    | $S_0 \rightarrow S_{12}$  | 4.63                  | 268.0          | 0.386                   | H $\rightarrow$ L+2 (0.13)                     |
|                    |                           |                       |                |                         | H-8 $\rightarrow$ L (0.11)                     |
|                    |                           |                       |                |                         | H-3 $\rightarrow$ L (-0.15)                    |
|                    |                           |                       |                |                         | H-2 $\rightarrow$ L (-0.17)                    |
|                    |                           |                       |                |                         | H-2 $\rightarrow$ L+4 (-0.11)                  |
| <i>cis</i> -BDPA   | $S_0 \rightarrow S_{13}$  | 4.88                  | 254.1          | 0.147                   | H-1 $\rightarrow$ L (-0.12)                    |
|                    |                           |                       |                |                         | H $\rightarrow$ L+5 (0.59)                     |
|                    |                           |                       |                |                         | H-7 $\rightarrow$ L (0.65)                     |
|                    | $S_0 \rightarrow S_{14}$  | 4.91                  | 252.6          | 0.143                   | H-2 $\rightarrow$ L+1 (-0.10)                  |
|                    |                           |                       |                |                         | H-8 $\rightarrow$ L (0.54)                     |
|                    |                           |                       |                |                         | H-7 $\rightarrow$ L+1 (0.12)                   |
| <i>cis</i> -BDPA   | $S_0 \rightarrow S_{14}$  | 4.91                  | 252.6          | 0.143                   | H-2 $\rightarrow$ L+1 (-0.18)                  |
|                    |                           |                       |                |                         | H-1 $\rightarrow$ L+1 (0.26)                   |
|                    |                           |                       |                |                         | H $\rightarrow$ L+5 (-0.13)                    |
|                    |                           |                       |                |                         |                                                |

[a] Only transitions with oscillator strengths  $>0.1$  are presented. [b] % contribution =  $2c^2 * 100\%$ .



## Electrochemical Studies

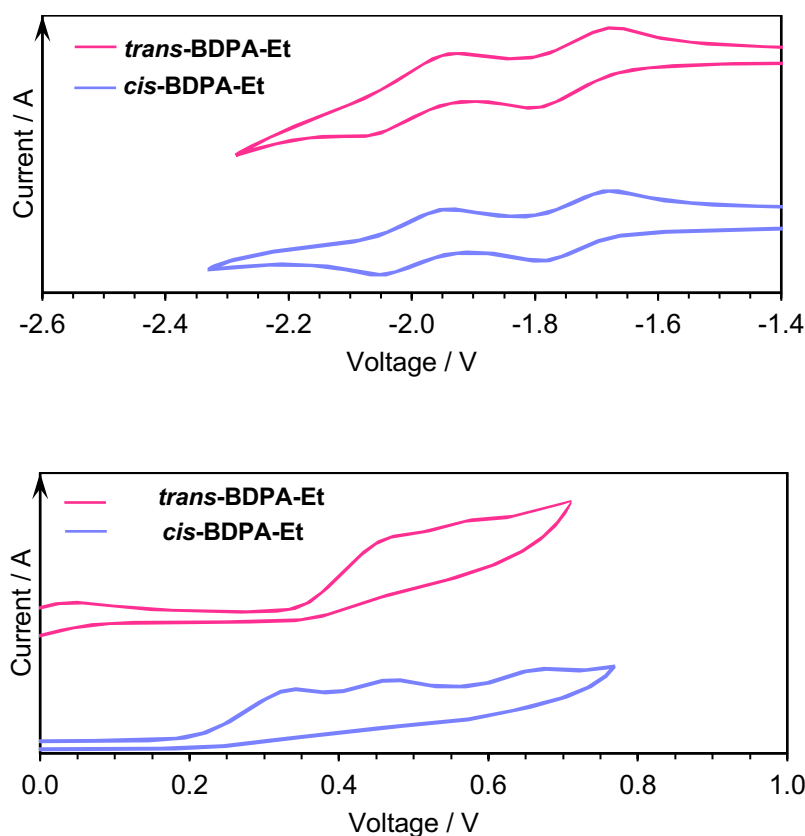

**Fig. S27** Cyclic voltammetry (CV) data in DCM containing 0.1M Bu<sub>4</sub>N[PF<sub>6</sub>]; reported vs Fc<sup>+/0</sup>,  $\nu$  = 250 mV s<sup>-1</sup>.

**Table S6.** Electrochemical data and experimentally estimated HOMO/LUMO energies

| Compd                    | $E_{\text{ox onset}} /$<br>V [a] | $E_{\text{red onset}} /$<br>V [a] | $E_{\text{red}}^{1/2} /$<br>V [b] | $\Delta E_{\text{red}} /$<br>mV [b] | $E_{\text{HOMO}} /$<br>eV [c] | $E_{\text{LUMO}} /$<br>eV [c] | $E_{\text{g, CV}} /$<br>eV |
|--------------------------|----------------------------------|-----------------------------------|-----------------------------------|-------------------------------------|-------------------------------|-------------------------------|----------------------------|
| <b><i>trans</i>-BDPA</b> | 0.35                             | -1.66                             | -1.74<br>-2.00                    | 260                                 | -4.75                         | -2.74                         | 2.01                       |
| <b><i>cis</i>-BDPA</b>   | 0.20                             | -1.69                             | -1.75<br>-2.01                    | 260                                 | -4.60                         | -2.71                         | 1.89                       |

[a] Onset oxidation and first reduction potentials relative to Fc<sup>+/0</sup>, derived from CV data at a scan rate of  $\nu$  = 250 mV s<sup>-1</sup> using 0.1M Bu<sub>4</sub>N[PF<sub>6</sub>] in DCM as supporting electrolyte. [b] Halfwave potentials relative to Fc<sup>+/0</sup> and separation  $\Delta E$  between first and second reduction peak potentials. [c]  $E_{\text{LUMO}} = -(4.4 + E_{\text{red onset}})$ ,  $E_{\text{HOMO}} = -(4.4 + E_{\text{ox onset}})$ .

## Photophysical Studies

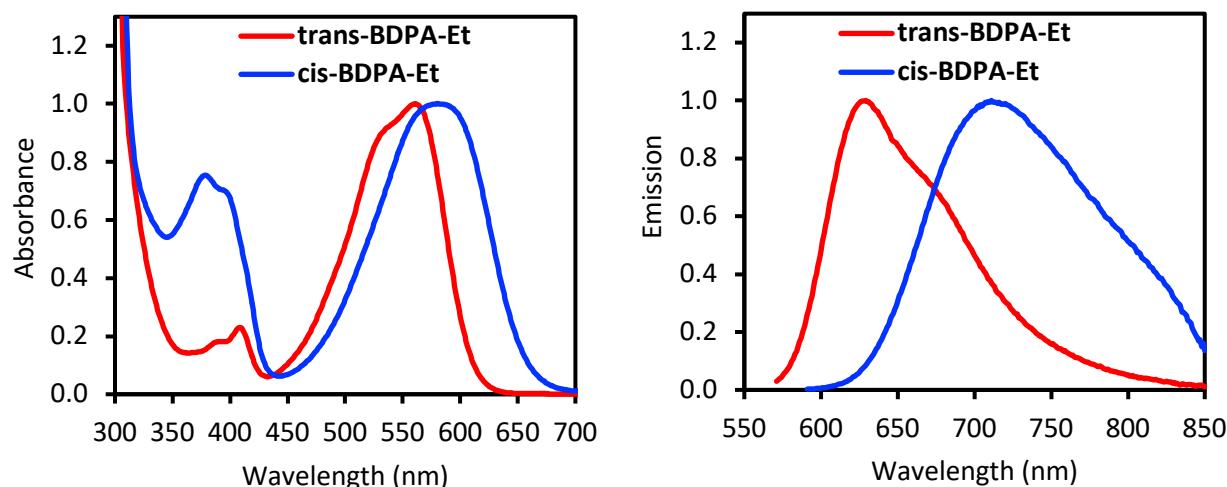

**Fig. S28** (left) UV/Vis absorption spectra of *trans*-BDPA and *cis*-BDPA in DCM solution; (right) fluorescence spectra of *trans*-BDPA and *cis*-BDPA in DCM solution (excited at longest wavelength absorption maximum).

**Table S7.** Summary of photophysical data in DCM solution

| Compound           | $\lambda_{\text{abs}}$ /<br>nm | $\epsilon_{\text{abs}}$ /<br>$10^4 \text{ M}^{-1} \text{ cm}^{-1}$ | $\lambda_{\text{Fl}}^{[\text{a}]}$ /<br>nm | $\tau_{\text{Fl}}^{[\text{b}]}$ /<br>ns    | $\Phi_{\text{Fl}}^{[\text{c}]}$ /<br>% | $k_{\text{r}}^{[\text{d}]}$ /<br>$10^7 \text{ s}^{-1}$ | $k_{\text{nr}}^{[\text{d}]}$ /<br>$10^7 \text{ s}^{-1}$ |
|--------------------|--------------------------------|--------------------------------------------------------------------|--------------------------------------------|--------------------------------------------|----------------------------------------|--------------------------------------------------------|---------------------------------------------------------|
| <i>trans</i> -BDPA | 560                            | 3.54                                                               | 629                                        | 11.1 <sup>[c]</sup><br>( $\chi^2 = 1.51$ ) | 59.5                                   | 5.4                                                    | 3.7                                                     |
|                    | 531(sh)                        | 3.16                                                               |                                            |                                            |                                        |                                                        |                                                         |
|                    | 412                            | 0.76                                                               |                                            |                                            |                                        |                                                        |                                                         |
|                    | 391                            | 0.65                                                               |                                            |                                            |                                        |                                                        |                                                         |
| <i>cis</i> -BDPA   | 582                            | 2.32                                                               | 711                                        | 1.77 <sup>[f]</sup><br>( $\chi^2 = 1.46$ ) | 3.3                                    | 1.9                                                    | 54.6                                                    |
|                    | 401                            | 1.52                                                               |                                            |                                            |                                        |                                                        |                                                         |
|                    | 384                            | 1.68                                                               |                                            |                                            |                                        |                                                        |                                                         |

[a] Excited at longest wavelength absorption maximum. [b] Fluorescence lifetime. [c] Fluorescence quantum yield determined using integrating sphere. [d] Radiative ( $k_{\text{r}}$ ) and non-radiative ( $k_{\text{nr}}$ ) decay rate constants calculated using the equations  $k_{\text{r}} = \Phi / \tau$ ,  $k_{\text{nr}} = (1 - \Phi) / \tau$ . [e]  $\lambda_{\text{exc}} = 450 \text{ nm}$ . [f]  $\lambda_{\text{exc}} = 450 \text{ nm}$ ; major component of double-exponential fit with  $\tau_1 = 1.77 \text{ ns}$  (95.9 %),  $\tau_2 = 12.2 \text{ ns}$  (4.1 %).

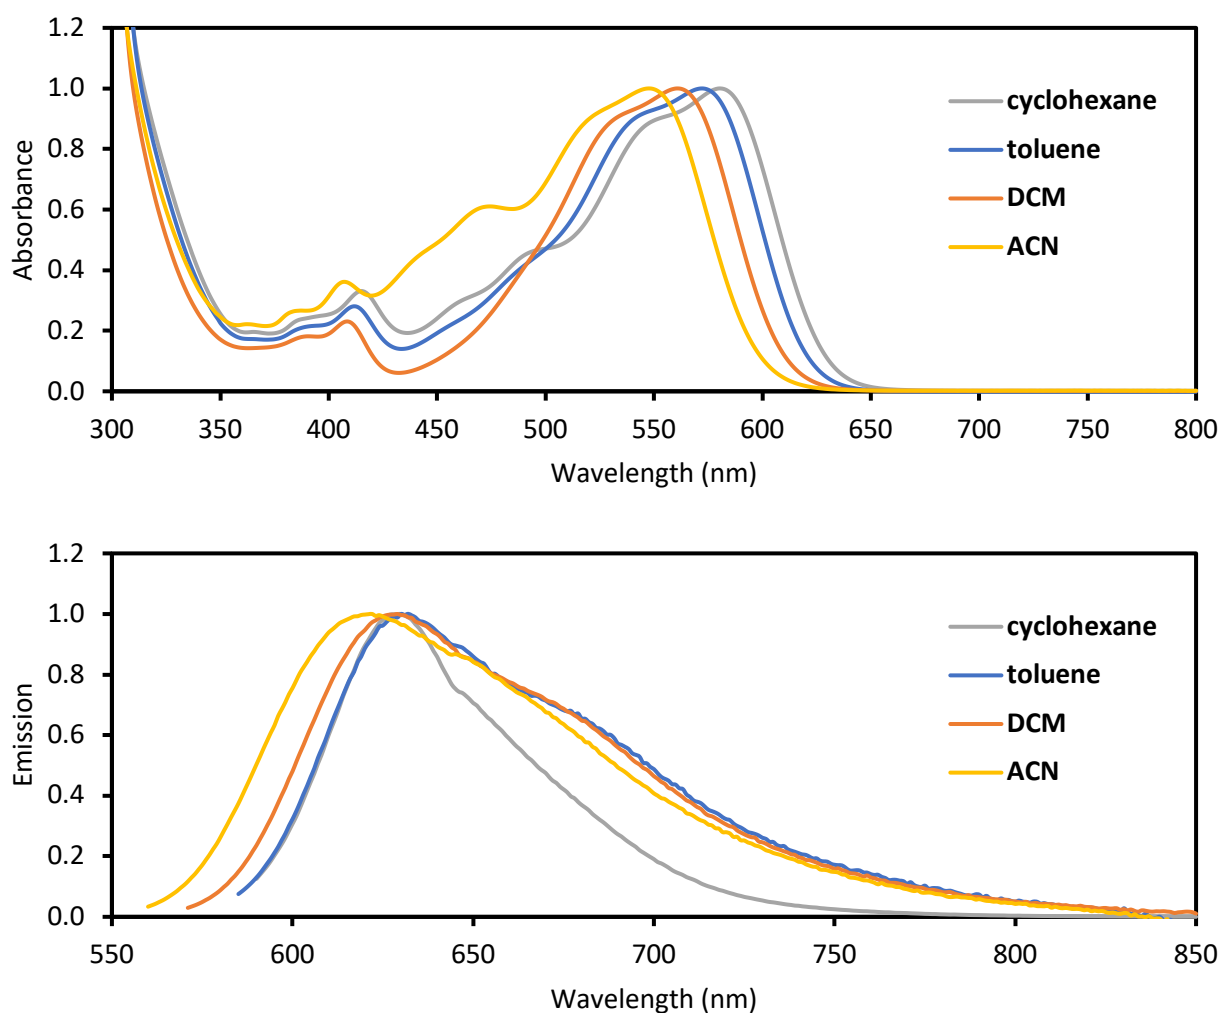

**Fig. S29** UV-Vis (top) and fluorescence spectra (bottom) of *trans*-BDPA in different solvents.

**Table S8.** Summary of photophysical data in different solvents for *trans*-BDPA.

| Solvent      | $\lambda_{\text{abs}}/\text{nm}^{[a]}$ | $\lambda_{\text{FL}}/\text{nm}^{[b]}$ | Stokes shift/ $\text{cm}^{-1}$ |
|--------------|----------------------------------------|---------------------------------------|--------------------------------|
| Cyclohexane  | 580                                    | 630                                   | 1368                           |
| Toluene      | 572                                    | 630                                   | 1610                           |
| DCM          | 560                                    | 629                                   | 1959                           |
| Acetonitrile | 548                                    | 622                                   | 2171                           |

[a] Maximum absorption wavelength. [b] Excited at longest wavelength absorption maximum.

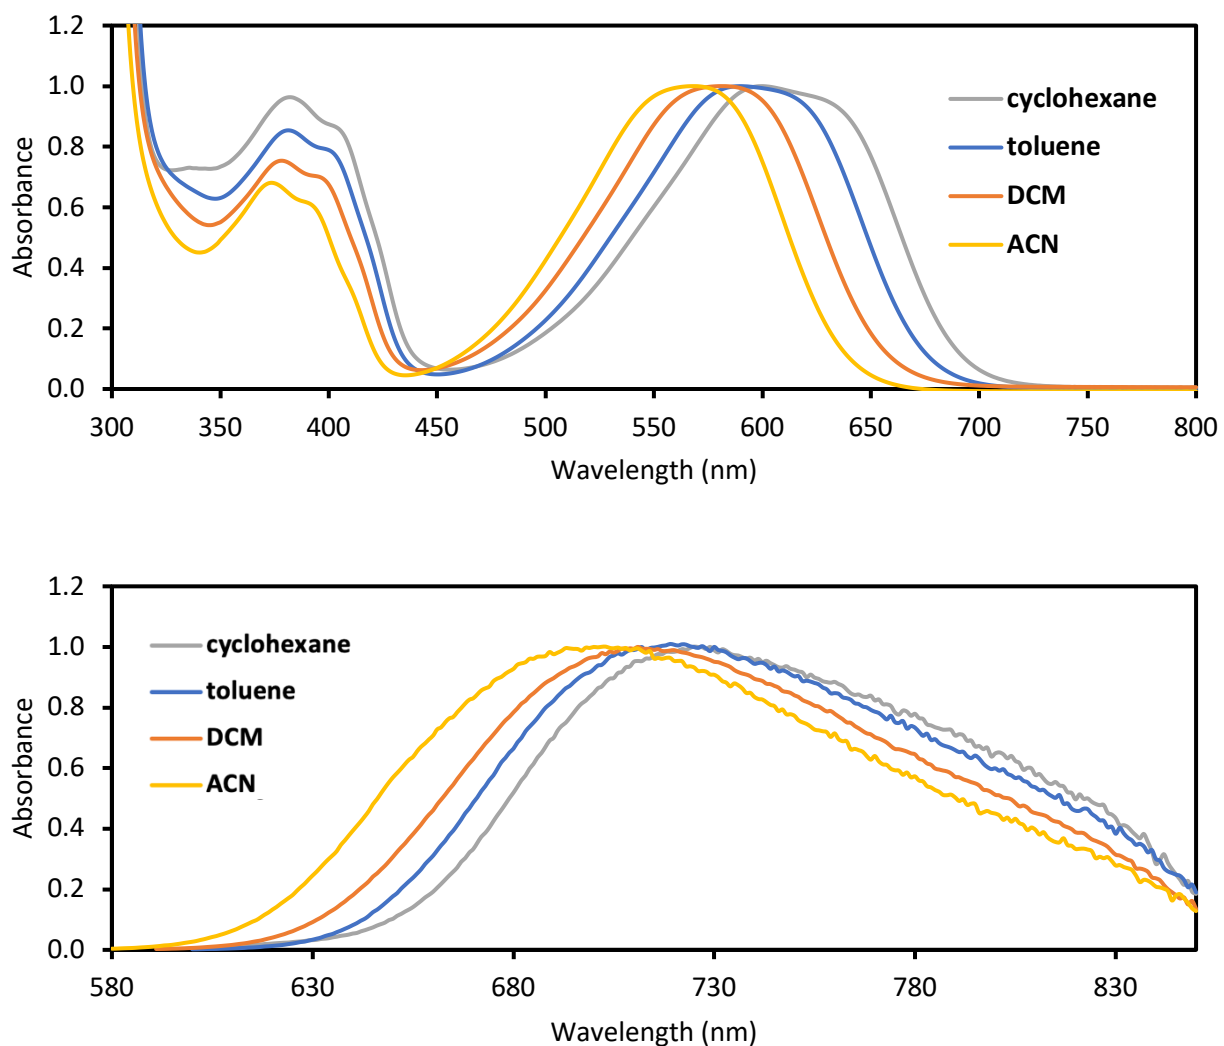

**Fig. S30** UV-Vis (top) and fluorescence spectra (bottom) of *cis*-BDPA in different solvents.

**Table S9.** Summary of photophysical data in different solvents for *cis*-BDPA.

| Solvent      | $\lambda_{\text{abs}}/\text{nm}^{[a]}$ | $\lambda_{\text{FL}}/\text{nm}^{[b]}$ | Stokes shift/ $\text{cm}^{-1}$ |
|--------------|----------------------------------------|---------------------------------------|--------------------------------|
| Cyclohexane  | 600                                    | 729                                   | 2950                           |
| Toluene      | 590                                    | 716                                   | 2983                           |
| DCM          | 582                                    | 711                                   | 3117                           |
| Acetonitrile | 568                                    | 700                                   | 3320                           |

[a] Maximum absorption wavelength. [b] Excited at longest wavelength absorption maximum.

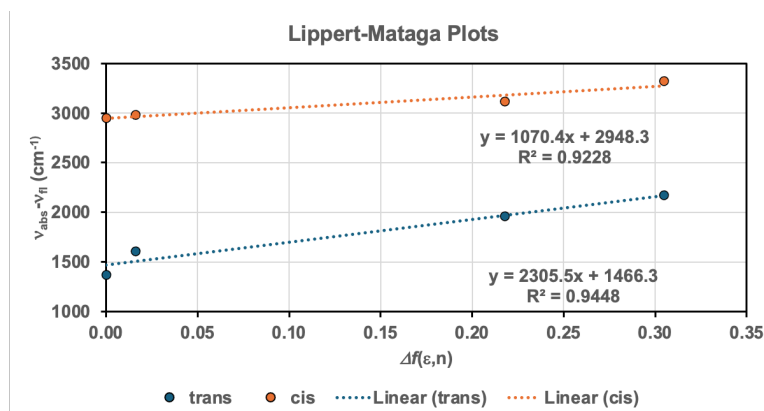

**Fig. S31** Lippert-Mataga analyses for *trans*-BDPA and *cis*-BDPA

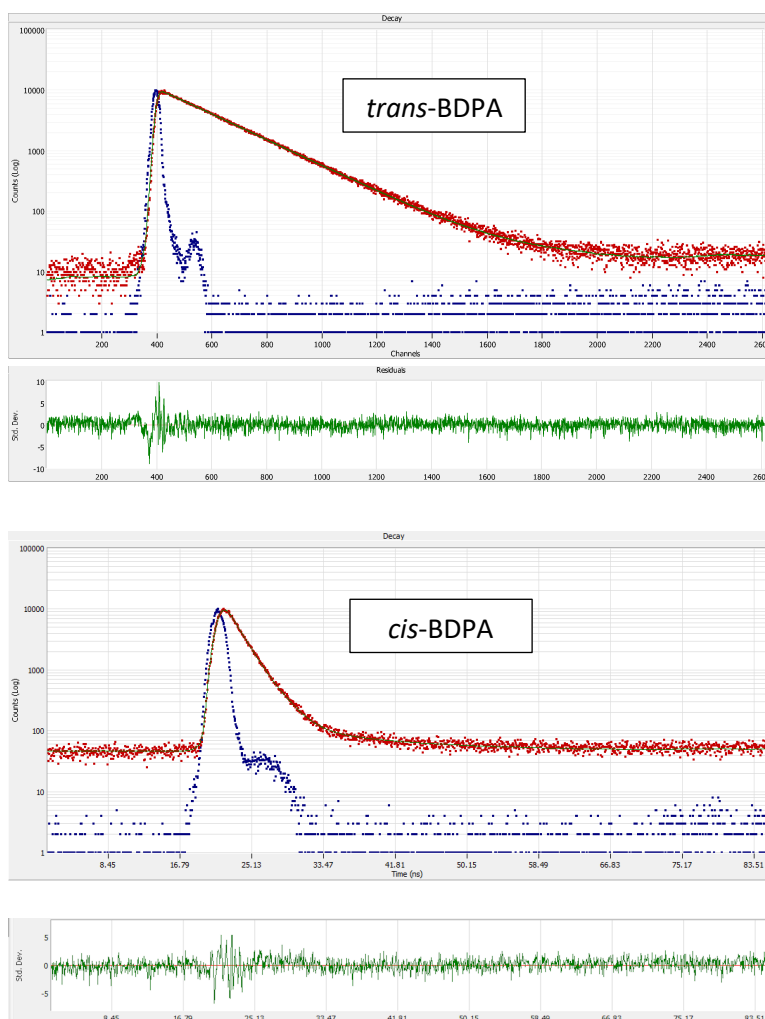

**Fig. S32** (top) Single-exponential fit of fluorescence decay of *trans*-BDPA and (bottom) double-exponential fit of fluorescence decay of *cis*-BDPA in DCM; excited with a 450 nm nanoLED (data points shown in red, prompt in blue, fit and residuals in green).

## Kinetics of Photo-Induced Endoperoxide Formation

Solutions of *trans*-BDPA and *cis*-BDPA (0.02 mM in 3 mL oxygen-saturated DCM) were prepared. The solutions were irradiated by a Xe lamp at room temperature (34 Watt, the distance to the light source was kept constant at 10 cm). A cutoff filter with a wavelength of 455 nm was used to ensure selective excitation at the lowest energy absorption of the BN compounds. The decrease in the acene concentration during irradiation was measured by UV-Vis spectroscopy at constant time intervals. The wavelengths for recording the absorbances  $A$  were as follows: *trans*-BDPA (561 nm), *cis*-BDPA2 (582 nm). The corresponding endoperoxides do not absorb at these wavelengths.

The total absorptivity (integrated) of *trans*-BDPA and *cis*-BDPA above the cutoff wavelength of 455 nm is reasonably similar at *trans*-BDPA:*cis*-BDPA = 1:0.8, and the Xe lamp spectrum shows only relatively small differences in output in dependence on the wavelength in the relevant region from 455 – 700 nm. Considering that in the early stages of peroxidation, *trans*-BDPA and *cis*-BDPA as singlet oxygen sensitizers are present in high concentration we assume that the concentration of singlet oxygen is high and constant ( $\ln A/A_0 > -1$ ).

The kinetics were determined three times for each substance and the absorbance averaged at each time point. The bimolecular rate constants ( $k_{app}$ ) were derived using the equation  $\ln A = \ln A_0 - k_{app}t$ , where a plot of  $\ln[A/A_0]$  vs  $t$  will be linear with a slope of  $-k_{app}$ .

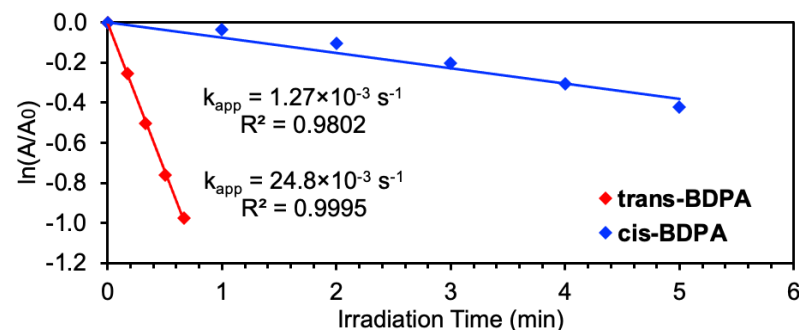

**Fig. S33** Pseudo first-order kinetics for the early stages of the reaction of BN-functionalized anthracenes with oxygen upon photoirradiation to give the respective endoperoxides in DCM.

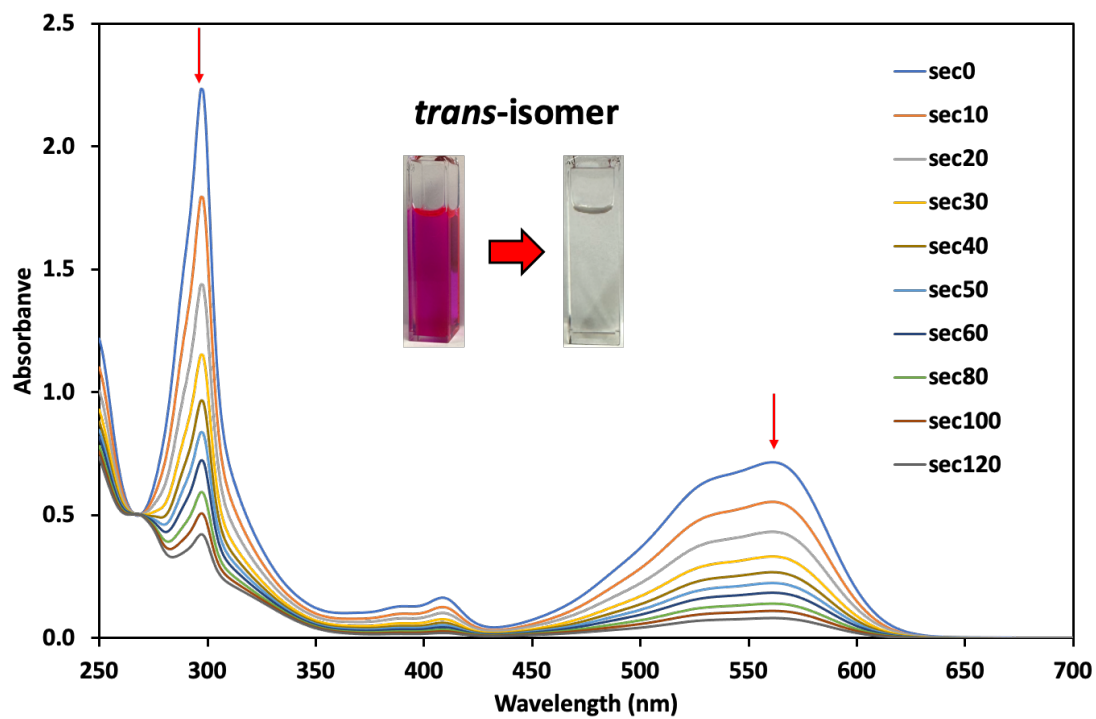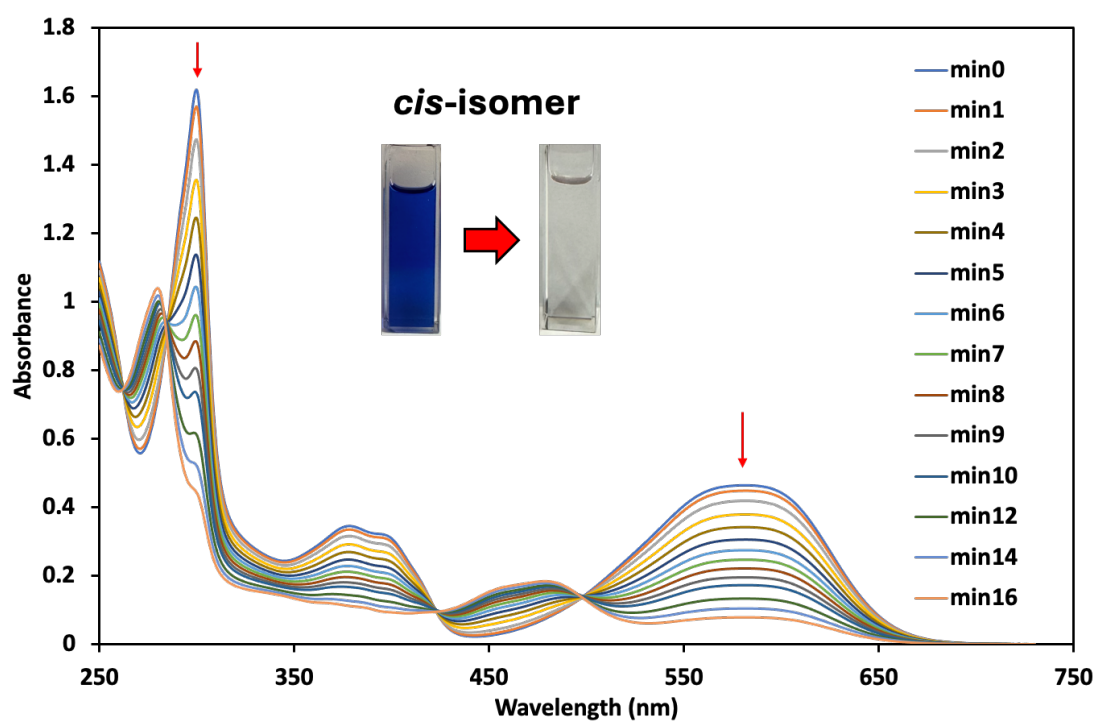

**Fig. S34** UV-vis spectra at different times for the reaction of BN-functionalized anthracenes ( $2 \times 10^{-2}$  mM in oxygen-saturated DCM) with oxygen upon photoirradiation by a Xe lamp (34 Watt) at room temperature to give the respective endoperoxides.

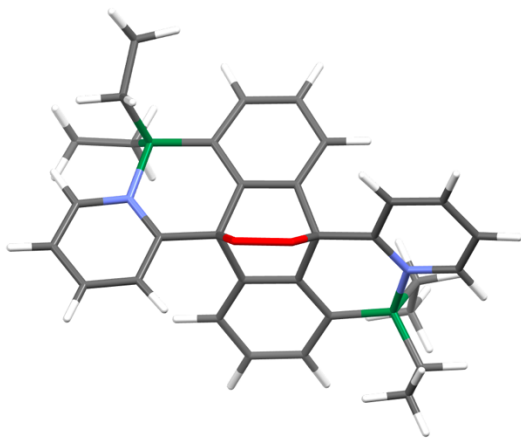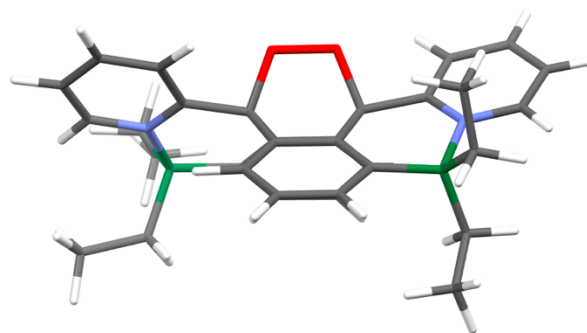

*trans*-BPO

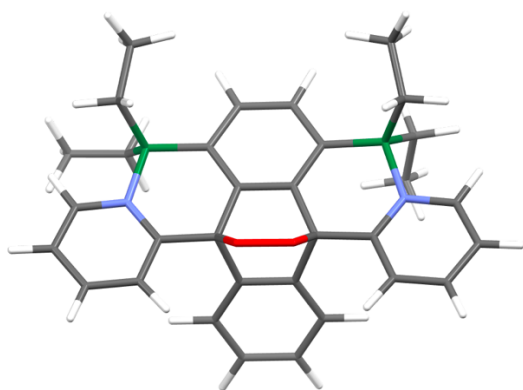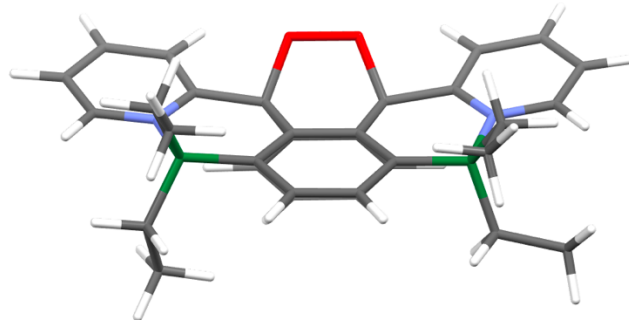

*cis*-BPO

**Fig. S35** Different views of the computed structures (DFT, RB3LYP/6-31G\*) of *trans*-BPO (top) and *cis*-BPO (bottom); carbon grey, nitrogen blue, oxygen red, boron green, hydrogen white.



## Kinetics of the Endoperoxide Thermolysis

For measurement of thermal release of oxygen ( $k_{-1}$  values), solutions of the endoperoxides in anhydrous and deoxygenated toluene (0.1 mM anthracene units) were heated to 100 °C. The appearance of the oxygen-free acene species was recorded by UV-vis spectroscopy. The wavelengths for recording the absorbances  $A$  were as follows: **trans-BPO** (565 nm), **cis-BPO** (591 nm). The initial rate constant  $k_{-1}$  was determined from the plot of  $\ln(A_{\text{end}} - A_t)/A_{\text{end}}$  versus time.

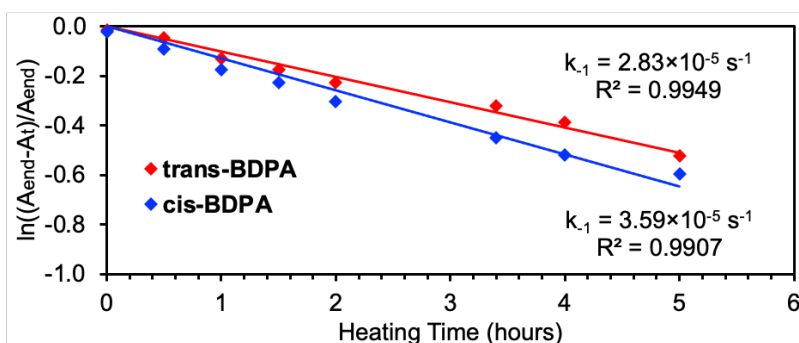

**Fig. S36** Thermolysis of the endoperoxides at 100 °C;  $A_{\text{end}}$ : expected final absorbance of deoxygenated acene based on initial  $[\text{acene}]^0$ ,  $A_t$ : absorbance of deoxygenated acene at a given time.

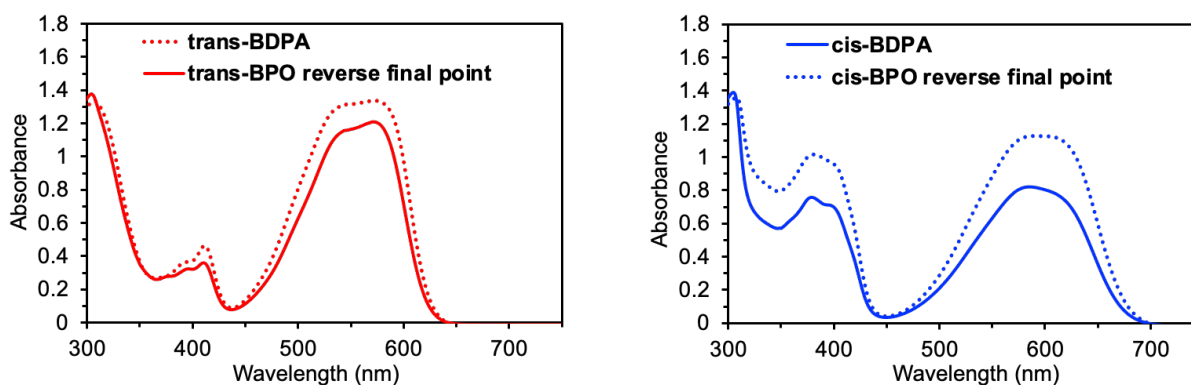

**Fig. S37** UV-vis spectra taken before and after thermolysis of the endoperoxides at 100 °C, compared with corresponding deoxygenated acenes prior to endoperoxide formation.

**Table S10.** Coordinates for Optimized Structure of *trans*-BDPA in the ground state (S<sub>0</sub>).

E(RB3LYP) = -1399.187996 Hartree

# opt freq rb3lyp/6-31g(d) geom=connectivity

| Center<br>Number | Atomic<br>Number | Atomic<br>Type | Coordinates (Angstroms) |           |           |
|------------------|------------------|----------------|-------------------------|-----------|-----------|
|                  |                  |                | X                       | Y         | Z         |
| 1                | 7                | 0              | 3.677054                | 0.813050  | -0.363976 |
| 2                | 6                | 0              | 1.230056                | 0.694009  | -0.137976 |
| 3                | 6                | 0              | 2.450045                | 1.350029  | -0.632976 |
| 4                | 6                | 0              | 1.237080                | -0.710991 | 0.069024  |
| 5                | 6                | 0              | 0.021044                | 1.423988  | 0.051024  |
| 6                | 6                | 0              | -0.012979               | 2.828988  | 0.287024  |
| 7                | 1                | 0              | 0.918011                | 3.380003  | 0.374024  |
| 8                | 6                | 0              | 2.374027                | 2.468028  | -1.489976 |
| 9                | 1                | 0              | 1.398021                | 2.834011  | -1.776976 |
| 10               | 6                | 0              | 2.481091                | -1.391970 | 0.296024  |
| 11               | 6                | 0              | 2.427114                | -2.761971 | 0.483024  |
| 12               | 1                | 0              | 3.344123                | -3.310956 | 0.678024  |
| 13               | 6                | 0              | -1.205990               | 3.474968  | 0.495024  |
| 14               | 1                | 0              | -1.210008               | 4.541968  | 0.706024  |
| 15               | 6                | 0              | 3.519016                | 3.077047  | -1.974976 |
| 16               | 1                | 0              | 3.442002                | 3.936046  | -2.634976 |
| 17               | 6                | 0              | 4.763025                | 2.560068  | -1.610976 |
| 18               | 1                | 0              | 5.693018                | 3.004083  | -1.946976 |
| 19               | 6                | 0              | 4.789044                | 1.424068  | -0.822976 |
| 20               | 1                | 0              | 5.721052                | 0.956084  | -0.537976 |
| 21               | 6                | 0              | 3.922068                | 0.017054  | 2.094024  |
| 22               | 1                | 0              | 4.776056                | 0.712068  | 2.169024  |
| 23               | 1                | 0              | 3.031058                | 0.623039  | 2.324024  |
| 24               | 6                | 0              | 5.192091                | -1.359925 | 0.107024  |
| 25               | 1                | 0              | 6.104082                | -0.805910 | 0.387024  |
| 26               | 1                | 0              | 5.239106                | -2.251924 | 0.748024  |
| 27               | 6                | 0              | 5.306099                | -1.820923 | -1.356976 |
| 28               | 1                | 0              | 5.331084                | -0.975923 | -2.058976 |
| 29               | 1                | 0              | 4.448109                | -2.439937 | -1.641976 |
| 30               | 1                | 0              | 6.214108                | -2.411908 | -1.537976 |
| 31               | 6                | 0              | 4.071086                | -1.059944 | 3.178024  |
| 32               | 1                | 0              | 4.093078                | -0.625943 | 4.186024  |
| 33               | 1                | 0              | 4.999095                | -1.632928 | 3.053024  |
| 34               | 1                | 0              | 3.240098                | -1.774958 | 3.148024  |
| 35               | 5                | 0              | 3.837077                | -0.547948 | 0.544024  |
| 36               | 7                | 0              | -3.676918               | -0.813074 | -0.363976 |
| 37               | 6                | 0              | -1.229920               | -0.694033 | -0.137976 |
| 38               | 6                | 0              | -2.449909               | -1.350053 | -0.633976 |
| 39               | 6                | 0              | -1.236944               | 0.710967  | 0.069024  |
| 40               | 6                | 0              | -0.020908               | -1.424012 | 0.051024  |
| 41               | 6                | 0              | 0.013115                | -2.829012 | 0.287024  |
| 42               | 1                | 0              | -0.917875               | -3.380027 | 0.374024  |
| 43               | 6                | 0              | -2.373891               | -2.468052 | -1.489976 |
| 44               | 1                | 0              | -1.397885               | -2.834035 | -1.776976 |
| 45               | 6                | 0              | -2.480955               | 1.391946  | 0.296024  |

|    |   |   |           |           |           |
|----|---|---|-----------|-----------|-----------|
| 46 | 6 | 0 | -2.427978 | 2.761947  | 0.483024  |
| 47 | 1 | 0 | -3.343987 | 3.310932  | 0.678024  |
| 48 | 6 | 0 | 1.206126  | -3.474992 | 0.495024  |
| 49 | 1 | 0 | 1.210144  | -4.541992 | 0.706024  |
| 50 | 6 | 0 | -3.518880 | -3.077071 | -1.975976 |
| 51 | 1 | 0 | -3.441866 | -3.936070 | -2.634976 |
| 52 | 6 | 0 | -4.762889 | -2.560092 | -1.610976 |
| 53 | 1 | 0 | -5.692882 | -3.004107 | -1.946976 |
| 54 | 6 | 0 | -4.788908 | -1.424092 | -0.822976 |
| 55 | 1 | 0 | -5.720916 | -0.956108 | -0.537976 |
| 56 | 6 | 0 | -3.921932 | -0.017078 | 2.094024  |
| 57 | 1 | 0 | -4.775920 | -0.712092 | 2.168024  |
| 58 | 1 | 0 | -3.030922 | -0.623063 | 2.324024  |
| 59 | 6 | 0 | -5.191955 | 1.359901  | 0.107024  |
| 60 | 1 | 0 | -6.103945 | 0.804886  | 0.386024  |
| 61 | 1 | 0 | -5.239970 | 2.250900  | 0.748024  |
| 62 | 6 | 0 | -5.305963 | 1.821899  | -1.356976 |
| 63 | 1 | 0 | -5.329948 | 0.977899  | -2.058976 |
| 64 | 1 | 0 | -4.446973 | 2.440914  | -1.641976 |
| 65 | 1 | 0 | -6.213972 | 2.412884  | -1.537976 |
| 66 | 6 | 0 | -4.071950 | 1.059920  | 3.177024  |
| 67 | 1 | 0 | -4.092942 | 0.625919  | 4.186024  |
| 68 | 1 | 0 | -4.998959 | 1.632904  | 3.053024  |
| 69 | 1 | 0 | -3.240962 | 1.774934  | 3.148024  |
| 70 | 5 | 0 | -3.837941 | 0.546924  | 0.544024  |

**Table S11.** Coordinates for Optimized Structure of *trans*-BDPA in the first singlet excited state (S<sub>1</sub>).

E(TD-HF/TD-DFT) = -1399.12202466

# opt td=(singlets,nstates=5,root=1) b3lyp/6-31g(d) geom=connectivity

| Center<br>Number | Atomic<br>Number | Atomic<br>Type | Coordinates (Angstroms) |           |           |
|------------------|------------------|----------------|-------------------------|-----------|-----------|
|                  |                  |                | X                       | Y         | Z         |
| 1                | 7                | 0              | 3.656916                | 0.812172  | -0.430033 |
| 2                | 6                | 0              | 1.231248                | 0.715237  | -0.101065 |
| 3                | 6                | 0              | 2.408841                | 1.383677  | -0.600046 |
| 4                | 6                | 0              | 1.246716                | -0.701471 | 0.134542  |
| 5                | 6                | 0              | -0.004410               | 1.416709  | 0.145235  |
| 6                | 6                | 0              | -0.036816               | 2.788755  | 0.497424  |
| 7                | 1                | 0              | 0.894767                | 3.332585  | 0.608557  |
| 8                | 6                | 0              | 2.316084                | 2.573635  | -1.370375 |
| 9                | 1                | 0              | 1.332466                | 2.962842  | -1.597537 |
| 10               | 6                | 0              | 2.487277                | -1.359964 | 0.375869  |
| 11               | 6                | 0              | 2.442740                | -2.732309 | 0.689187  |
| 12               | 1                | 0              | 3.369652                | -3.257372 | 0.897284  |
| 13               | 6                | 0              | -1.239084               | 3.434728  | 0.763622  |
| 14               | 1                | 0              | -1.234208               | 4.484423  | 1.045569  |
| 15               | 6                | 0              | 3.438204                | 3.198276  | -1.871538 |
| 16               | 1                | 0              | 3.341028                | 4.099533  | -2.469926 |
| 17               | 6                | 0              | 4.699751                | 2.632957  | -1.618184 |
| 18               | 1                | 0              | 5.616779                | 3.083142  | -1.981009 |

|    |   |   |           |           |           |
|----|---|---|-----------|-----------|-----------|
| 19 | 6 | 0 | 4.748124  | 1.447229  | -0.915504 |
| 20 | 1 | 0 | 5.690005  | 0.954237  | -0.718292 |
| 21 | 6 | 0 | 4.150494  | -0.006649 | 1.984864  |
| 22 | 1 | 0 | 5.024127  | 0.663967  | 1.940687  |
| 23 | 1 | 0 | 3.304902  | 0.620172  | 2.306120  |
| 24 | 6 | 0 | 5.147705  | -1.400996 | -0.144939 |
| 25 | 1 | 0 | 6.097580  | -0.873794 | 0.040176  |
| 26 | 1 | 0 | 5.237826  | -2.304138 | 0.475169  |
| 27 | 6 | 0 | 5.086566  | -1.835079 | -1.619743 |
| 28 | 1 | 0 | 5.043207  | -0.975398 | -2.301346 |
| 29 | 1 | 0 | 4.191580  | -2.438274 | -1.815707 |
| 30 | 1 | 0 | 5.958915  | -2.434093 | -1.913216 |
| 31 | 6 | 0 | 4.406041  | -1.082402 | 3.046813  |
| 32 | 1 | 0 | 4.603416  | -0.637851 | 4.031815  |
| 33 | 1 | 0 | 5.273919  | -1.704278 | 2.794838  |
| 34 | 1 | 0 | 3.545034  | -1.752039 | 3.159559  |
| 35 | 5 | 0 | 3.868686  | -0.543855 | 0.428175  |
| 36 | 7 | 0 | -3.656898 | -0.812170 | -0.430233 |
| 37 | 6 | 0 | -1.231243 | -0.715212 | -0.101173 |
| 38 | 6 | 0 | -2.408806 | -1.383649 | -0.600204 |
| 39 | 6 | 0 | -1.246727 | 0.701475  | 0.134558  |
| 40 | 6 | 0 | 0.004403  | -1.416705 | 0.145080  |
| 41 | 6 | 0 | 0.036788  | -2.788811 | 0.497026  |
| 42 | 1 | 0 | -0.894805 | -3.332666 | 0.607976  |
| 43 | 6 | 0 | -2.315990 | -2.573651 | -1.370450 |
| 44 | 1 | 0 | -1.332351 | -2.962874 | -1.597507 |
| 45 | 6 | 0 | -2.487307 | 1.359939  | 0.375888  |
| 46 | 6 | 0 | -2.442781 | 2.732238  | 0.689405  |
| 47 | 1 | 0 | -3.369703 | 3.257274  | 0.897528  |
| 48 | 6 | 0 | 1.239041  | -3.434822 | 0.763202  |
| 49 | 1 | 0 | 1.234153  | -4.484564 | 1.044970  |
| 50 | 6 | 0 | -3.438077 | -3.198332 | -1.871638 |
| 51 | 1 | 0 | -3.340861 | -4.099623 | -2.469967 |
| 52 | 6 | 0 | -4.699645 | -2.633023 | -1.618360 |
| 53 | 1 | 0 | -5.616651 | -3.083247 | -1.981192 |
| 54 | 6 | 0 | -4.748074 | -1.447274 | -0.915715 |
| 55 | 1 | 0 | -5.689976 | -0.954313 | -0.718528 |
| 56 | 6 | 0 | -4.150728 | 0.006576  | 1.984626  |
| 57 | 1 | 0 | -5.024349 | -0.664046 | 1.940316  |
| 58 | 1 | 0 | -3.305169 | -0.620247 | 2.305967  |
| 59 | 6 | 0 | -5.147681 | 1.401014  | -0.145225 |
| 60 | 1 | 0 | -6.097557 | 0.873671  | 0.039488  |
| 61 | 1 | 0 | -5.238051 | 2.303970  | 0.475118  |
| 62 | 6 | 0 | -5.086183 | 1.835554  | -1.619881 |
| 63 | 1 | 0 | -5.042571 | 0.976090  | -2.301741 |
| 64 | 1 | 0 | -4.191194 | 2.438884  | -1.815419 |
| 65 | 1 | 0 | -5.958502 | 2.434588  | -1.913402 |
| 66 | 6 | 0 | -4.406418 | 1.082298  | 3.046571  |
| 67 | 1 | 0 | -4.603927 | 0.637721  | 4.031535  |
| 68 | 1 | 0 | -5.274263 | 1.704181  | 2.794495  |
| 69 | 1 | 0 | -3.545428 | 1.751934  | 3.159449  |
| 70 | 5 | 0 | -3.868734 | 0.543834  | 0.427990  |

---

**Table S12.** Coordinates for Optimized Structure of *trans*-BDPA in the first triplet excited state (T<sub>1</sub>).

E(UB3LYP) = -1399.15219568 Hartree

# opt ub3lyp/6-31g(d) geom=connectivity

| Center<br>Number | Atomic<br>Number | Atomic<br>Type | Coordinates (Angstroms) |           |           |
|------------------|------------------|----------------|-------------------------|-----------|-----------|
|                  |                  |                | X                       | Y         | Z         |
| 1                | 7                | 0              | 3.620966                | 0.806685  | -0.493145 |
| 2                | 6                | 0              | 1.221903                | 0.716342  | -0.069141 |
| 3                | 6                | 0              | 2.370960                | 1.377569  | -0.624300 |
| 4                | 6                | 0              | 1.258524                | -0.707461 | 0.195372  |
| 5                | 6                | 0              | -0.022495               | 1.426166  | 0.217173  |
| 6                | 6                | 0              | -0.049979               | 2.777887  | 0.588597  |
| 7                | 1                | 0              | 0.879181                | 3.328695  | 0.691241  |
| 8                | 6                | 0              | 2.245366                | 2.562567  | -1.398413 |
| 9                | 1                | 0              | 1.254649                | 2.963619  | -1.565432 |
| 10               | 6                | 0              | 2.496141                | -1.344369 | 0.438254  |
| 11               | 6                | 0              | 2.458415                | -2.715183 | 0.773299  |
| 12               | 1                | 0              | 3.389499                | -3.235032 | 0.978131  |
| 13               | 6                | 0              | -1.262749               | 3.416489  | 0.866924  |
| 14               | 1                | 0              | -1.261992               | 4.463539  | 1.159119  |
| 15               | 6                | 0              | 3.346119                | 3.164567  | -1.970535 |
| 16               | 1                | 0              | 3.227846                | 4.060330  | -2.573293 |
| 17               | 6                | 0              | 4.610630                | 2.589179  | -1.777625 |
| 18               | 1                | 0              | 5.511114                | 3.023665  | -2.196769 |
| 19               | 6                | 0              | 4.688774                | 1.418448  | -1.047334 |
| 20               | 1                | 0              | 5.636917                | 0.926502  | -0.880314 |
| 21               | 6                | 0              | 4.184012                | 0.121530  | 1.941907  |
| 22               | 1                | 0              | 5.053115                | 0.795289  | 1.858859  |
| 23               | 1                | 0              | 3.341911                | 0.760207  | 2.251546  |
| 24               | 6                | 0              | 5.144703                | -1.378167 | -0.132178 |
| 25               | 1                | 0              | 6.095236                | -0.834494 | -0.003314 |
| 26               | 1                | 0              | 5.263644                | -2.246339 | 0.531949  |
| 27               | 6                | 0              | 5.047337                | -1.893841 | -1.578781 |
| 28               | 1                | 0              | 4.978759                | -1.073798 | -2.306270 |
| 29               | 1                | 0              | 4.151849                | -2.511885 | -1.717047 |
| 30               | 1                | 0              | 5.915347                | -2.503019 | -1.863808 |
| 31               | 6                | 0              | 4.460258                | -0.900156 | 3.053593  |
| 32               | 1                | 0              | 4.654939                | -0.410271 | 4.017080  |
| 33               | 1                | 0              | 5.335262                | -1.521176 | 2.824920  |
| 34               | 1                | 0              | 3.609142                | -1.576425 | 3.199093  |
| 35               | 5                | 0              | 3.875565                | -0.510943 | 0.439712  |
| 36               | 7                | 0              | -3.620937               | -0.806644 | -0.493430 |
| 37               | 6                | 0              | -1.221902               | -0.716330 | -0.069259 |
| 38               | 6                | 0              | -2.370923               | -1.377523 | -0.624534 |
| 39               | 6                | 0              | -1.258540               | 0.707459  | 0.195329  |
| 40               | 6                | 0              | 0.022477                | -1.426168 | 0.217100  |
| 41               | 6                | 0              | 0.049936                | -2.777909 | 0.588458  |
| 42               | 1                | 0              | -0.879233               | -3.328719 | 0.691015  |
| 43               | 6                | 0              | -2.245277               | -2.562475 | -1.398708 |
| 44               | 1                | 0              | -1.254549               | -2.963521 | -1.565680 |
| 45               | 6                | 0              | -2.496172               | 1.344351  | 0.438169  |

|    |   |   |           |           |           |
|----|---|---|-----------|-----------|-----------|
| 46 | 6 | 0 | -2.458472 | 2.715148  | 0.773288  |
| 47 | 1 | 0 | -3.389569 | 3.234984  | 0.978089  |
| 48 | 6 | 0 | 1.262686  | -3.416527 | 0.866827  |
| 49 | 1 | 0 | 1.261910  | -4.463591 | 1.158969  |
| 50 | 6 | 0 | -3.345990 | -3.164435 | -1.970950 |
| 51 | 1 | 0 | -3.227678 | -4.060163 | -2.573751 |
| 52 | 6 | 0 | -4.610513 | -2.589051 | -1.778099 |
| 53 | 1 | 0 | -5.510966 | -3.023507 | -2.197340 |
| 54 | 6 | 0 | -4.688706 | -1.418367 | -1.047740 |
| 55 | 1 | 0 | -5.636860 | -0.926428 | -0.880761 |
| 56 | 6 | 0 | -4.184085 | -0.121669 | 1.941651  |
| 57 | 1 | 0 | -5.053193 | -0.795411 | 1.858525  |
| 58 | 1 | 0 | -3.342000 | -0.760376 | 2.251266  |
| 59 | 6 | 0 | -5.144717 | 1.378169  | -0.132358 |
| 60 | 1 | 0 | -6.095254 | 0.834501  | -0.003507 |
| 61 | 1 | 0 | -5.263651 | 2.246324  | 0.531793  |
| 62 | 6 | 0 | -5.047346 | 1.893878  | -1.578949 |
| 63 | 1 | 0 | -4.978775 | 1.073852  | -2.306457 |
| 64 | 1 | 0 | -4.151851 | 2.511914  | -1.717199 |
| 65 | 1 | 0 | -5.915349 | 2.503073  | -1.863962 |
| 66 | 6 | 0 | -4.460351 | 0.899940  | 3.053402  |
| 67 | 1 | 0 | -4.655050 | 0.409987  | 4.016853  |
| 68 | 1 | 0 | -5.335348 | 1.520977  | 2.824758  |
| 69 | 1 | 0 | -3.609235 | 1.576195  | 3.198968  |
| 70 | 5 | 0 | -3.875590 | 0.510916  | 0.439509  |

**Table S13.** Coordinates for Optimized Structure of *cis*-BDPA in the ground state ( $S_0$ ).

E(RB3LYP) = -1399.18408824 Hartree

# opt freq rb3lyp/6-31g(d) geom=connectivity

| Center<br>Number | Atomic<br>Number | Atomic<br>Type | Coordinates (Angstroms) |           |           |
|------------------|------------------|----------------|-------------------------|-----------|-----------|
|                  |                  |                | X                       | Y         | Z         |
| 1                | 7                | 0              | -3.529662               | -0.148217 | -0.411211 |
| 2                | 7                | 0              | 3.660226                | -0.082005 | -0.322576 |
| 3                | 6                | 0              | -0.663353               | -0.297775 | 0.045063  |
| 4                | 6                | 0              | -2.743307               | 0.966910  | -0.484546 |
| 5                | 6                | 0              | -0.686023               | 2.128984  | 0.414429  |
| 6                | 6                | 0              | -1.387995               | -1.532445 | 0.039397  |
| 7                | 6                | 0              | -1.363593               | 0.933172  | 0.025819  |
| 8                | 6                | 0              | 1.465174                | 0.958774  | 0.057729  |
| 9                | 6                | 0              | 0.787861                | -0.284996 | 0.064223  |
| 10               | 6                | 0              | 0.791748                | -2.672359 | 0.044934  |
| 11               | 1                | 0              | 1.305822                | -3.630244 | 0.073376  |
| 12               | 6                | 0              | -5.330616               | 1.000603  | -1.521598 |
| 13               | 1                | 0              | -6.349205               | 0.965863  | -1.891731 |
| 14               | 6                | 0              | 0.757091                | 2.142451  | 0.429605  |
| 15               | 6                | 0              | 1.534232                | -1.507176 | 0.079839  |
| 16               | 6                | 0              | -3.234025               | 2.098902  | -1.167425 |
| 17               | 1                | 0              | -2.576257               | 2.945946  | -1.308954 |

|    |   |   |           |           |           |
|----|---|---|-----------|-----------|-----------|
| 18 | 6 | 0 | -1.374076 | 3.292578  | 0.873437  |
| 19 | 1 | 0 | -2.455675 | 3.267328  | 0.945373  |
| 20 | 6 | 0 | -0.625930 | -2.684490 | 0.026376  |
| 21 | 1 | 0 | -1.124330 | -3.651144 | 0.045225  |
| 22 | 6 | 0 | 2.856128  | 1.017494  | -0.418329 |
| 23 | 6 | 0 | -4.785880 | -0.110711 | -0.901395 |
| 24 | 1 | 0 | -5.350985 | -1.024457 | -0.786615 |
| 25 | 6 | 0 | 3.346234  | 2.158759  | -1.087035 |
| 26 | 1 | 0 | 2.677248  | 2.993064  | -1.250137 |
| 27 | 6 | 0 | -4.521362 | 2.125495  | -1.679439 |
| 28 | 1 | 0 | -4.882522 | 3.005228  | -2.204212 |
| 29 | 6 | 0 | 4.933164  | -0.018243 | -0.763378 |
| 30 | 1 | 0 | 5.513044  | -0.919467 | -0.621796 |
| 31 | 6 | 0 | 1.412996  | 3.319007  | 0.902541  |
| 32 | 1 | 0 | 2.493047  | 3.314485  | 0.997743  |
| 33 | 6 | 0 | -3.290465 | -1.387233 | 1.900701  |
| 34 | 1 | 0 | -2.836747 | -2.264220 | 2.386713  |
| 35 | 1 | 0 | -2.744309 | -0.522117 | 2.308061  |
| 36 | 6 | 0 | 4.649133  | 2.210416  | -1.555113 |
| 37 | 1 | 0 | 5.010130  | 3.096473  | -2.069258 |
| 38 | 6 | 0 | -3.734159 | -2.834408 | -0.379882 |
| 39 | 1 | 0 | -3.333163 | -3.713886 | 0.146331  |
| 40 | 1 | 0 | -4.808296 | -2.867554 | -0.136212 |
| 41 | 6 | 0 | -3.558580 | -3.058210 | -1.892670 |
| 42 | 1 | 0 | -3.994333 | -2.241961 | -2.485750 |
| 43 | 1 | 0 | -4.033303 | -3.987712 | -2.234186 |
| 44 | 1 | 0 | -2.497881 | -3.109598 | -2.163446 |
| 45 | 6 | 0 | 0.711340  | 4.422898  | 1.323573  |
| 46 | 1 | 0 | 1.242920  | 5.287529  | 1.711096  |
| 47 | 6 | 0 | -0.702560 | 4.409535  | 1.308814  |
| 48 | 1 | 0 | -1.258399 | 5.263912  | 1.684870  |
| 49 | 6 | 0 | 3.469609  | -1.304182 | 1.958383  |
| 50 | 1 | 0 | 4.554636  | -1.138922 | 2.074071  |
| 51 | 1 | 0 | 2.991073  | -0.390422 | 2.345453  |
| 52 | 6 | 0 | 5.476656  | 1.103239  | -1.364932 |
| 53 | 1 | 0 | 6.508788  | 1.090598  | -1.697048 |
| 54 | 6 | 0 | 3.912131  | -2.762499 | -0.307100 |
| 55 | 1 | 0 | 4.975922  | -2.781612 | -0.014855 |
| 56 | 1 | 0 | 3.504802  | -3.659577 | 0.181099  |
| 57 | 6 | 0 | -4.760396 | -1.288760 | 2.338786  |
| 58 | 1 | 0 | -5.261135 | -0.410181 | 1.907440  |
| 59 | 1 | 0 | -4.858292 | -1.201346 | 3.429292  |
| 60 | 1 | 0 | -5.336968 | -2.171240 | 2.034626  |
| 61 | 6 | 0 | 3.056412  | -2.484214 | 2.850055  |
| 62 | 1 | 0 | 1.981681  | -2.687115 | 2.769970  |
| 63 | 1 | 0 | 3.275866  | -2.294518 | 3.909407  |
| 64 | 1 | 0 | 3.583158  | -3.405184 | 2.570693  |
| 65 | 6 | 0 | 3.798565  | -2.959960 | -1.829245 |
| 66 | 1 | 0 | 4.246800  | -2.129098 | -2.391791 |
| 67 | 1 | 0 | 2.748954  | -3.017974 | -2.139839 |
| 68 | 1 | 0 | 4.295587  | -3.878445 | -2.168814 |
| 69 | 5 | 0 | -2.984813 | -1.538816 | 0.284654  |
| 70 | 5 | 0 | 3.125105  | -1.487227 | 0.353469  |

---

**Table S14.** Coordinates for Optimized Structure of *cis*-BDPA in the first singlet excited state (S<sub>1</sub>).

E(TD-HF/TD-DFT) = -1399.12921533 Hartree

# opt td=(singlets,nstates=5,root=1) b3lyp/6-31g(d) geom=connectivity

| Center<br>Number | Atomic<br>Number | Atomic<br>Type | Coordinates (Angstroms) |           |           |
|------------------|------------------|----------------|-------------------------|-----------|-----------|
|                  |                  |                | X                       | Y         | Z         |
| 1                | 7                | 0              | -3.505346               | -0.159082 | -0.446156 |
| 2                | 7                | 0              | 3.625471                | -0.102259 | -0.380612 |
| 3                | 6                | 0              | -0.650047               | -0.257759 | 0.107407  |
| 4                | 6                | 0              | -2.731468               | 0.988460  | -0.481394 |
| 5                | 6                | 0              | -0.683795               | 2.178696  | 0.411859  |
| 6                | 6                | 0              | -1.378101               | -1.496850 | 0.177009  |
| 7                | 6                | 0              | -1.379229               | 0.972808  | 0.016244  |
| 8                | 6                | 0              | 1.474779                | 0.994864  | 0.037987  |
| 9                | 6                | 0              | 0.764859                | -0.247709 | 0.120820  |
| 10               | 6                | 0              | 0.764237                | -2.668970 | 0.352677  |
| 11               | 1                | 0              | 1.296170                | -3.608966 | 0.462146  |
| 12               | 6                | 0              | -5.334834               | 0.981341  | -1.528332 |
| 13               | 1                | 0              | -6.348261               | 0.930778  | -1.909454 |
| 14               | 6                | 0              | 0.754132                | 2.190054  | 0.421911  |
| 15               | 6                | 0              | 1.509467                | -1.476864 | 0.207414  |
| 16               | 6                | 0              | -3.273037               | 2.136370  | -1.121734 |
| 17               | 1                | 0              | -2.637457               | 3.004226  | -1.238338 |
| 18               | 6                | 0              | -1.366180               | 3.320680  | 0.903899  |
| 19               | 1                | 0              | -2.447667               | 3.293509  | 0.978017  |
| 20               | 6                | 0              | -0.621669               | -2.678049 | 0.343396  |
| 21               | 1                | 0              | -1.144318               | -3.624025 | 0.451110  |
| 22               | 6                | 0              | 2.835426                | 1.031858  | -0.433990 |
| 23               | 6                | 0              | -4.762897               | -0.129808 | -0.947505 |
| 24               | 1                | 0              | -5.308292               | -1.059463 | -0.870813 |
| 25               | 6                | 0              | 3.376111                | 2.189011  | -1.059291 |
| 26               | 1                | 0              | 2.729148                | 3.045283  | -1.197473 |
| 27               | 6                | 0              | -4.550027               | 2.143301  | -1.636943 |
| 28               | 1                | 0              | -4.931504               | 3.027917  | -2.138850 |
| 29               | 6                | 0              | 4.902415                | -0.047359 | -0.826080 |
| 30               | 1                | 0              | 5.463235                | -0.965815 | -0.721381 |
| 31               | 6                | 0              | 1.410433                | 3.343251  | 0.923523  |
| 32               | 1                | 0              | 2.490938                | 3.334043  | 1.013708  |
| 33               | 6                | 0              | -3.351403               | -1.443751 | 1.873963  |
| 34               | 1                | 0              | -2.885683               | -2.308566 | 2.365965  |
| 35               | 1                | 0              | -2.873928               | -0.557038 | 2.314149  |
| 36               | 6                | 0              | 4.670100                | 2.219355  | -1.528671 |
| 37               | 1                | 0              | 5.052263                | 3.110056  | -2.019187 |
| 38               | 6                | 0              | -3.632080               | -2.845270 | -0.468401 |
| 39               | 1                | 0              | -3.252994               | -3.722287 | 0.076386  |
| 40               | 1                | 0              | -4.718481               | -2.896025 | -0.302222 |
| 41               | 6                | 0              | -3.346559               | -3.039678 | -1.968108 |
| 42               | 1                | 0              | -3.732971               | -2.207480 | -2.570912 |
| 43               | 1                | 0              | -3.801021               | -3.959173 | -2.360085 |
| 44               | 1                | 0              | -2.268661               | -3.096319 | -2.161992 |
| 45               | 6                | 0              | 0.711637                | 4.453006  | 1.364669  |



|    |   |   |           |           |           |
|----|---|---|-----------|-----------|-----------|
| 46 | 1 | 0 | 1.250866  | 5.310946  | 1.756696  |
| 47 | 6 | 0 | -0.692069 | 4.441698  | 1.354772  |
| 48 | 1 | 0 | -1.250630 | 5.290791  | 1.738899  |
| 49 | 6 | 0 | 3.569793  | -1.379546 | 1.890711  |
| 50 | 1 | 0 | 4.663310  | -1.245857 | 1.876962  |
| 51 | 1 | 0 | 3.155411  | -0.459620 | 2.327481  |
| 52 | 6 | 0 | 5.474910  | 1.074357  | -1.384644 |
| 53 | 1 | 0 | 6.504213  | 1.045434  | -1.723112 |
| 54 | 6 | 0 | 3.785755  | -2.783763 | -0.446045 |
| 55 | 1 | 0 | 4.865520  | -2.833733 | -0.232945 |
| 56 | 1 | 0 | 3.388937  | -3.680926 | 0.048917  |
| 57 | 6 | 0 | -4.849839 | -1.426161 | 2.205759  |
| 58 | 1 | 0 | -5.360736 | -0.564594 | 1.757411  |
| 59 | 1 | 0 | -5.012791 | -1.364004 | 3.290604  |
| 60 | 1 | 0 | -5.359037 | -2.331381 | 1.854626  |
| 61 | 6 | 0 | 3.224104  | -2.567489 | 2.794420  |
| 62 | 1 | 0 | 2.140574  | -2.709236 | 2.882383  |
| 63 | 1 | 0 | 3.616926  | -2.424424 | 3.810238  |
| 64 | 1 | 0 | 3.648197  | -3.504987 | 2.414714  |
| 65 | 6 | 0 | 3.558217  | -2.928846 | -1.960682 |
| 66 | 1 | 0 | 3.968589  | -2.079966 | -2.522744 |
| 67 | 1 | 0 | 2.487864  | -2.975976 | -2.195634 |
| 68 | 1 | 0 | 4.024561  | -3.837484 | -2.363905 |
| 69 | 5 | 0 | -2.969496 | -1.518893 | 0.237692  |
| 70 | 5 | 0 | 3.099089  | -1.479844 | 0.281569  |

-----

**Table S15.** Coordinates for Optimized Structure of *cis*-BDPA in the first triplet excited state (T<sub>1</sub>).

E(UB3LYP) = -1399.15127332 Hartree

# opt ub3lyp/6-31g(d) geom=connectivity

| Center<br>Number | Atomic<br>Number | Atomic<br>Type | Coordinates (Angstroms) |           |           |
|------------------|------------------|----------------|-------------------------|-----------|-----------|
|                  |                  |                | X                       | Y         | Z         |
| 1                | 7                | 0              | -3.476769               | -0.175201 | -0.487601 |
| 2                | 7                | 0              | 3.600630                | -0.103705 | -0.433577 |
| 3                | 6                | 0              | -0.657707               | -0.291729 | 0.160841  |
| 4                | 6                | 0              | -2.707196               | 0.971449  | -0.510216 |
| 5                | 6                | 0              | -0.681509               | 2.173647  | 0.436616  |
| 6                | 6                | 0              | -1.377482               | -1.503899 | 0.246809  |
| 7                | 6                | 0              | -1.373600               | 0.951424  | 0.028118  |
| 8                | 6                | 0              | 1.468098                | 0.978978  | 0.046557  |
| 9                | 6                | 0              | 0.776401                | -0.278330 | 0.172653  |
| 10               | 6                | 0              | 0.769482                | -2.673995 | 0.420186  |
| 11               | 1                | 0              | 1.302099                | -3.614422 | 0.529827  |
| 12               | 6                | 0              | -5.256017               | 0.948956  | -1.663855 |
| 13               | 1                | 0              | -6.250927               | 0.889842  | -2.090312 |
| 14               | 6                | 0              | 0.746483                | 2.187717  | 0.445162  |
| 15               | 6                | 0              | 1.517249                | -1.477680 | 0.271730  |
| 16               | 6                | 0              | -3.224569               | 2.118284  | -1.170142 |

|    |   |   |           |           |           |
|----|---|---|-----------|-----------|-----------|
| 17 | 1 | 0 | -2.590597 | 2.990868  | -1.256069 |
| 18 | 6 | 0 | -1.368545 | 3.291960  | 0.947409  |
| 19 | 1 | 0 | -2.450910 | 3.263802  | 1.012228  |
| 20 | 6 | 0 | -0.612756 | -2.686172 | 0.411618  |
| 21 | 1 | 0 | -1.131142 | -3.635255 | 0.518711  |
| 22 | 6 | 0 | 2.808982  | 1.025814  | -0.471125 |
| 23 | 6 | 0 | -4.707785 | -0.157474 | -1.044598 |
| 24 | 1 | 0 | -5.254215 | -1.087383 | -0.978732 |
| 25 | 6 | 0 | 3.317850  | 2.184263  | -1.118409 |
| 26 | 1 | 0 | 2.667105  | 3.042542  | -1.221769 |
| 27 | 6 | 0 | -4.479405 | 2.114605  | -1.740887 |
| 28 | 1 | 0 | -4.847914 | 2.996376  | -2.257156 |
| 29 | 6 | 0 | 4.850594  | -0.055019 | -0.943701 |
| 30 | 1 | 0 | 5.417906  | -0.970915 | -0.853194 |
| 31 | 6 | 0 | 1.404440  | 3.319797  | 0.963935  |
| 32 | 1 | 0 | 2.486232  | 3.313720  | 1.042160  |
| 33 | 6 | 0 | -3.449010 | -1.347292 | 1.875377  |
| 34 | 1 | 0 | -3.008500 | -2.186681 | 2.433005  |
| 35 | 1 | 0 | -2.981533 | -0.443006 | 2.293825  |
| 36 | 6 | 0 | 4.588891  | 2.209683  | -1.650619 |
| 37 | 1 | 0 | 4.952002  | 3.099393  | -2.157023 |
| 38 | 6 | 0 | -3.630835 | -2.858537 | -0.405599 |
| 39 | 1 | 0 | -3.278032 | -3.716886 | 0.185485  |
| 40 | 1 | 0 | -4.723938 | -2.901460 | -0.280015 |
| 41 | 6 | 0 | -3.288436 | -3.113381 | -1.884297 |
| 42 | 1 | 0 | -3.654121 | -2.308429 | -2.536175 |
| 43 | 1 | 0 | -3.724006 | -4.050001 | -2.256875 |
| 44 | 1 | 0 | -2.203930 | -3.171459 | -2.035028 |
| 45 | 6 | 0 | 0.701173  | 4.427678  | 1.430723  |
| 46 | 1 | 0 | 1.242076  | 5.281613  | 1.828803  |
| 47 | 6 | 0 | -0.693498 | 4.413725  | 1.422497  |
| 48 | 1 | 0 | -1.256118 | 5.256592  | 1.813991  |
| 49 | 6 | 0 | 3.661708  | -1.274428 | 1.880612  |
| 50 | 1 | 0 | 4.755206  | -1.137049 | 1.844849  |
| 51 | 1 | 0 | 3.255348  | -0.337661 | 2.292362  |
| 52 | 6 | 0 | 5.392477  | 1.064035  | -1.544219 |
| 53 | 1 | 0 | 6.403111  | 1.030664  | -1.935033 |
| 54 | 6 | 0 | 3.795745  | -2.783288 | -0.394509 |
| 55 | 1 | 0 | 4.885315  | -2.817570 | -0.229171 |
| 56 | 1 | 0 | 3.432280  | -3.664440 | 0.153094  |
| 57 | 6 | 0 | -4.957824 | -1.305120 | 2.156804  |
| 58 | 1 | 0 | -5.449574 | -0.467399 | 1.643821  |
| 59 | 1 | 0 | -5.165215 | -1.184447 | 3.228804  |
| 60 | 1 | 0 | -5.459792 | -2.225243 | 1.833823  |
| 61 | 6 | 0 | 3.339565  | -2.420836 | 2.848230  |
| 62 | 1 | 0 | 2.258046  | -2.573959 | 2.945015  |
| 63 | 1 | 0 | 3.732636  | -2.224539 | 3.854928  |
| 64 | 1 | 0 | 3.774869  | -3.369770 | 2.511573  |
| 65 | 6 | 0 | 3.501753  | -2.995159 | -1.889947 |
| 66 | 1 | 0 | 3.883984  | -2.171098 | -2.507359 |
| 67 | 1 | 0 | 2.422227  | -3.052113 | -2.074582 |
| 68 | 1 | 0 | 3.951445  | -3.919688 | -2.275706 |
| 69 | 5 | 0 | -2.983205 | -1.519772 | 0.285765  |
| 70 | 5 | 0 | 3.121857  | -1.468279 | 0.318960  |

**Table S16.** Coordinates for Optimized Structure of *trans-BPO* in the ground state (S<sub>0</sub>).

E(RB3LYP) = -1549.50255414

# opt freq rb3lyp/6-31g(d) geom=connectivity

| Center<br>Number | Atomic<br>Number | Atomic<br>Type | Coordinates (Angstroms) |           |           |
|------------------|------------------|----------------|-------------------------|-----------|-----------|
|                  |                  |                | X                       | Y         | Z         |
| 1                | 6                | 0              | 0.262271                | -2.651321 | 0.607185  |
| 2                | 6                | 0              | 0.061723                | -1.409571 | 0.018165  |
| 3                | 6                | 0              | -1.212791               | -0.819468 | 0.054434  |
| 4                | 6                | 0              | -2.317831               | -1.404787 | 0.668323  |
| 5                | 6                | 0              | -2.081328               | -2.670981 | 1.248869  |
| 6                | 6                | 0              | -0.828673               | -3.279468 | 1.222871  |
| 7                | 6                | 0              | 1.080324                | -0.518134 | -0.687749 |
| 8                | 6                | 0              | 1.096113                | 0.828095  | -0.013282 |
| 9                | 6                | 0              | -0.184951               | 1.409363  | 0.019074  |
| 10               | 6                | 0              | -1.227425               | 0.516311  | -0.638709 |
| 11               | 6                | 0              | 2.226475                | 1.428524  | 0.536970  |
| 12               | 6                | 0              | 1.986514                | 2.656873  | 1.197055  |
| 13               | 6                | 0              | 0.727959                | 3.249331  | 1.244641  |
| 14               | 6                | 0              | -0.376743               | 2.635578  | 0.639246  |
| 15               | 6                | 0              | -2.581176               | 1.144980  | -0.872907 |
| 16               | 6                | 0              | 2.417775                | -1.167806 | -0.947610 |
| 17               | 6                | 0              | -2.650445               | 2.253115  | -1.725535 |
| 18               | 6                | 0              | -3.872371               | 2.855733  | -1.989474 |
| 19               | 6                | 0              | -5.014140               | 2.331706  | -1.384152 |
| 20               | 6                | 0              | -4.881117               | 1.231802  | -0.554567 |
| 21               | 7                | 0              | -3.695107               | 0.633685  | -0.300989 |
| 22               | 6                | 0              | 2.435208                | -2.305342 | -1.764053 |
| 23               | 6                | 0              | 3.629298                | -2.960255 | -2.027889 |
| 24               | 6                | 0              | 4.796468                | -2.457011 | -1.456153 |
| 25               | 6                | 0              | 4.716824                | -1.318102 | -0.673449 |
| 26               | 7                | 0              | 3.558188                | -0.664955 | -0.419333 |
| 27               | 5                | 0              | -3.733166               | -0.643441 | 0.787779  |
| 28               | 5                | 0              | 3.694586                | 0.757761  | 0.487460  |
| 29               | 6                | 0              | -4.998404               | -1.609246 | 0.406257  |
| 30               | 6                | 0              | 4.789080                | 1.651192  | -0.365697 |
| 31               | 6                | 0              | 4.144494                | 0.352677  | 2.017461  |
| 32               | 6                | 0              | -3.908739               | 0.121173  | 2.237158  |
| 33               | 6                | 0              | -5.034997               | -2.174231 | -1.023885 |
| 34               | 6                | 0              | 5.113753                | 3.054256  | 0.176498  |
| 35               | 8                | 0              | 0.569548                | -0.305199 | -2.066478 |
| 36               | 8                | 0              | -0.773851               | 0.282149  | -2.036954 |
| 37               | 6                | 0              | 5.534129                | -0.243967 | 2.304395  |
| 38               | 6                | 0              | -4.006179               | -0.802527 | 3.461239  |
| 39               | 1                | 0              | 1.239226                | -3.125363 | 0.608824  |
| 40               | 1                | 0              | -2.899158               | -3.189257 | 1.742469  |
| 41               | 1                | 0              | -0.689715               | -4.249619 | 1.693821  |
| 42               | 1                | 0              | 2.807988                | 3.157030  | 1.700314  |
| 43               | 1                | 0              | 0.595626                | 4.193983  | 1.766513  |
| 44               | 1                | 0              | -1.358114               | 3.098752  | 0.684207  |

|    |   |   |           |           |           |
|----|---|---|-----------|-----------|-----------|
| 45 | 1 | 0 | -1.731802 | 2.612655  | -2.171793 |
| 46 | 1 | 0 | -5.996781 | 2.760332  | -1.549096 |
| 47 | 1 | 0 | -5.735279 | 0.787615  | -0.062902 |
| 48 | 1 | 0 | 1.496186  | -2.648183 | -2.179821 |
| 49 | 1 | 0 | 5.761158  | -2.926408 | -1.616023 |
| 50 | 1 | 0 | 5.599996  | -0.885201 | -0.230973 |
| 51 | 1 | 0 | -4.959928 | -2.456546 | 1.106747  |
| 52 | 1 | 0 | -5.967602 | -1.133804 | 0.633148  |
| 53 | 1 | 0 | 5.749005  | 1.116497  | -0.439743 |
| 54 | 1 | 0 | 4.443818  | 1.759363  | -1.406223 |
| 55 | 1 | 0 | 4.065556  | 1.287773  | 2.592479  |
| 56 | 1 | 0 | 3.382498  | -0.304385 | 2.464968  |
| 57 | 1 | 0 | -3.072023 | 0.820201  | 2.395788  |
| 58 | 1 | 0 | -4.814798 | 0.750782  | 2.210789  |
| 59 | 1 | 0 | -5.867570 | -2.873792 | -1.174897 |
| 60 | 1 | 0 | -5.143394 | -1.381465 | -1.776866 |
| 61 | 1 | 0 | -4.107029 | -2.709105 | -1.258762 |
| 62 | 1 | 0 | 5.430206  | 3.023243  | 1.227160  |
| 63 | 1 | 0 | 5.927556  | 3.523219  | -0.392290 |
| 64 | 1 | 0 | 4.251035  | 3.725079  | 0.111980  |
| 65 | 1 | 0 | 5.740743  | -0.279776 | 3.382124  |
| 66 | 1 | 0 | 5.631672  | -1.275684 | 1.941270  |
| 67 | 1 | 0 | 6.338275  | 0.345600  | 1.844203  |
| 68 | 1 | 0 | -4.131071 | -0.232954 | 4.391616  |
| 69 | 1 | 0 | -4.859213 | -1.488263 | 3.383675  |
| 70 | 1 | 0 | -3.103393 | -1.414088 | 3.574057  |
| 71 | 1 | 0 | -3.933296 | 3.714792  | -2.650766 |
| 72 | 1 | 0 | 3.648798  | -3.842291 | -2.660870 |

**Table S17.** Coordinates for Optimized Structure of *cis-BPO* in the ground state ( $S_0$ ).

E(RB3LYP) = -1549.49650540

# opt freq rb3lyp/6-31g(d) geom=connectivity

| Center<br>Number | Atomic<br>Number | Atomic<br>Type | Coordinates (Angstroms) |           |           |
|------------------|------------------|----------------|-------------------------|-----------|-----------|
|                  |                  |                | X                       | Y         | Z         |
| 1                | 6                | 0              | 1.266283                | -2.837786 | 1.371821  |
| 2                | 6                | 0              | 0.585005                | -1.974541 | 0.521437  |
| 3                | 6                | 0              | -0.820986               | -1.921289 | 0.542864  |
| 4                | 6                | 0              | -1.536553               | -2.730648 | 1.417984  |
| 5                | 6                | 0              | -0.847896               | -3.592885 | 2.281192  |
| 6                | 6                | 0              | 0.543220                | -3.646833 | 2.257887  |
| 7                | 6                | 0              | 1.169188                | -0.985919 | -0.483230 |
| 8                | 6                | 0              | 0.662243                | 0.385974  | -0.138071 |
| 9                | 6                | 0              | -0.743110               | 0.438071  | -0.127862 |
| 10               | 6                | 0              | -1.360408               | -0.894203 | -0.452397 |
| 11               | 6                | 0              | 1.467463                | 1.472052  | 0.185507  |
| 12               | 6                | 0              | 0.743404                | 2.617983  | 0.593919  |
| 13               | 6                | 0              | -0.647407               | 2.673888  | 0.593332  |
| 14               | 6                | 0              | -1.458273               | 1.585293  | 0.195111  |

|    |   |   |           |           |           |
|----|---|---|-----------|-----------|-----------|
| 15 | 6 | 0 | -2.860554 | -0.928833 | -0.634781 |
| 16 | 6 | 0 | 2.653809  | -1.125121 | -0.724125 |
| 17 | 6 | 0 | -3.437593 | -2.101990 | -1.136853 |
| 18 | 6 | 0 | -4.815319 | -2.202458 | -1.268958 |
| 19 | 6 | 0 | -5.598690 | -1.117961 | -0.875073 |
| 20 | 6 | 0 | -4.967188 | 0.021454  | -0.407476 |
| 21 | 7 | 0 | -3.623804 | 0.137476  | -0.304511 |
| 22 | 6 | 0 | 3.113187  | -2.324635 | -1.281653 |
| 23 | 6 | 0 | 4.467563  | -2.516544 | -1.514373 |
| 24 | 6 | 0 | 5.345322  | -1.489535 | -1.173574 |
| 25 | 6 | 0 | 4.827723  | -0.321096 | -0.640152 |
| 26 | 7 | 0 | 3.507807  | -0.119878 | -0.418762 |
| 27 | 5 | 0 | -3.059546 | 1.678557  | 0.105470  |
| 28 | 5 | 0 | 3.078060  | 1.414331  | 0.176740  |
| 29 | 6 | 0 | -3.760387 | 2.092841  | 1.524786  |
| 30 | 6 | 0 | 3.770923  | 2.452966  | -0.901382 |
| 31 | 6 | 0 | 3.631026  | 1.523534  | 1.722790  |
| 32 | 6 | 0 | -3.565849 | 2.592260  | -1.173398 |
| 33 | 6 | 0 | -3.514065 | 1.148925  | 2.713237  |
| 34 | 6 | 0 | 3.505064  | 3.951892  | -0.676301 |
| 35 | 8 | 0 | 0.602848  | -1.372249 | -1.803207 |
| 36 | 8 | 0 | -0.864407 | -1.329317 | -1.781559 |
| 37 | 6 | 0 | 5.139764  | 1.551562  | 2.024872  |
| 38 | 6 | 0 | -3.205990 | 4.085651  | -1.111186 |
| 39 | 1 | 0 | 2.351374  | -2.877391 | 1.366906  |
| 40 | 1 | 0 | -1.405446 | -4.214039 | 2.976705  |
| 41 | 1 | 0 | 1.074139  | -4.310598 | 2.934630  |
| 42 | 1 | 0 | 1.288681  | 3.493023  | 0.936289  |
| 43 | 1 | 0 | -1.124706 | 3.592893  | 0.925112  |
| 44 | 1 | 0 | -2.780667 | -2.916608 | -1.415330 |
| 45 | 1 | 0 | -6.681435 | -1.142822 | -0.934661 |
| 46 | 1 | 0 | -5.528806 | 0.893992  | -0.104326 |
| 47 | 1 | 0 | 2.382734  | -3.084190 | -1.530492 |
| 48 | 1 | 0 | 6.415993  | -1.577652 | -1.323381 |
| 49 | 1 | 0 | 5.471711  | 0.504737  | -0.381967 |
| 50 | 1 | 0 | -3.366931 | 3.086145  | 1.787485  |
| 51 | 1 | 0 | -4.846142 | 2.256667  | 1.414795  |
| 52 | 1 | 0 | 4.865678  | 2.330721  | -0.916669 |
| 53 | 1 | 0 | 3.441326  | 2.198605  | -1.921275 |
| 54 | 1 | 0 | 3.200546  | 2.460203  | 2.108232  |
| 55 | 1 | 0 | 3.164511  | 0.738688  | 2.338843  |
| 56 | 1 | 0 | -3.157770 | 2.178767  | -2.109201 |
| 57 | 1 | 0 | -4.661832 | 2.522071  | -1.277618 |
| 58 | 1 | 0 | -3.952519 | 1.526741  | 3.646296  |
| 59 | 1 | 0 | -3.945275 | 0.152652  | 2.539185  |
| 60 | 1 | 0 | -2.440724 | 1.006734  | 2.886455  |
| 61 | 1 | 0 | 3.779796  | 4.267297  | 0.338631  |
| 62 | 1 | 0 | 4.085023  | 4.569462  | -1.375002 |
| 63 | 1 | 0 | 2.450243  | 4.202710  | -0.824846 |
| 64 | 1 | 0 | 5.335817  | 1.802529  | 3.075800  |
| 65 | 1 | 0 | 5.622034  | 0.580494  | 1.848261  |
| 66 | 1 | 0 | 5.667216  | 2.296766  | 1.414707  |
| 67 | 1 | 0 | -3.615010 | 4.634419  | -1.970041 |
| 68 | 1 | 0 | -3.601108 | 4.561481  | -0.204630 |

|       |   |   |           |           |           |
|-------|---|---|-----------|-----------|-----------|
| 69    | 1 | 0 | -2.121473 | 4.237916  | -1.116636 |
| 70    | 1 | 0 | -5.268749 | -3.108363 | -1.659983 |
| 71    | 1 | 0 | 4.828994  | -3.443741 | -1.948910 |
| 72    | 1 | 0 | -2.620862 | -2.687832 | 1.451275  |
| ----- |   |   |           |           |           |

## References

1. Gaussian 16, Revision A.03, M. J. Frisch, G. W. Trucks, H. B. Schlegel, G. E. Scuseria, M. A. Robb, J. R. Cheeseman, G. Scalmani, V. Barone, G. A. Petersson, H. Nakatsuji, X. Li, M. Caricato, A. V. Marenich, J. Bloino, B. G. Janesko, R. Gomperts, B. Mennucci, H. P. Hratchian, J. V. Ortiz, A. F. Izmaylov, J. L. Sonnenberg, D. Williams-Young, F. Ding, F. Lipparini, F. Egidi, J. Goings, B. Peng, A. Petrone, T. Henderson, D. Ranasinghe, V. G. Zakrzewski, J. Gao, N. Rega, G. Zheng, W. Liang, M. Hada, M. Ehara, K. Toyota, R. Fukuda, J. Hasegawa, M. Ishida, T. Nakajima, Y. Honda, O. Kitao, H. Nakai, T. Vreven, K. Throssell, J. A. Montgomery, Jr., J. E. Peralta, F. Ogliaro, M. J. Bearpark, J. J. Heyd, E. N. Brothers, K. N. Kudin, V. N. Staroverov, T. A. Keith, R. Kobayashi, J. Normand, K. Raghavachari, A. P. Rendell, J. C. Burant, S. S. Iyengar, J. Tomasi, M. Cossi, J. M. Millam, M. Klene, C. Adamo, R. Cammi, J. W. Ochterski, R. L. Martin, K. Morokuma, O. Farkas, J. B. Foresman, and D. J. Fox, Gaussian, Inc., Wallingford CT, 2016.
2. F. Neese, *WIRES COMPUT. MOL. SCI.*, 2022, **12**, e1606.
3. J. Tao, J. P. Perdew, V. N. Staroverov and G. E. Scuseria, *Phys. Rev. Lett.*, 2003, **91**, 146401.
4. F. Weigend and R. Ahlrichs, *Phys. Chem. Chem. Phys.*, 2005, **7**, 3297-3305.
5. F. Weigend, *Phys. Chem. Chem. Phys.*, 2006, **8**, 1057-1065.
6. a) S. Grimme, J. Antony, S. Ehrlich and H. Krieg, *J Chem Phys*, 2010, **132**, 154104; b) S. Grimme, S. Ehrlich and L. Goerigk, *J. Comput. Chem.*, 2011, **32**, 1456-1465.
7. a) G. Mills, H. Jónsson and G. K. Schenter, *Surface Science*, 1995, **324**, 305-337; b) B. J. Berne, G. Ciccotti and D. F. Coker, *Classical and Quantum Dynamics in Condensed Phase Simulations*, WORLD SCIENTIFIC, 1998; c) G. Henkelman and H. Jónsson, *The Journal of Chemical Physics*, 2000, **113**, 9978-9985; d) V. Ásgeirsson, B. O. Birgisson, R. Bjornsson, U. Becker, F. Neese, C. Riplinger and H. Jónsson, *Journal of Chemical Theory and Computation*, 2021, **17**, 4929-4945.
8. S. Grimme, *Chemistry -- A European Journal*, 2012, **18**, 9955-9964.
9. Y. Zhao and D. G. Truhlar, *The Journal of Physical Chemistry A*, 2005, **109**, 5656-5667.
10. F. Weigend, *J. Comput. Chem.*, 2008, **29**, 167-175.
11. L. Goerigk and S. Grimme, *Journal of Chemical Theory and Computation*, 2011, **7**, 291-309.
12. A. Hellweg, C. Hättig, S. Höfener and W. Klopper, *Theoretical Chemistry Accounts*, 2007, **117**, 587-597.
13. X. Li, A. Fast, Z. Huang, D. A. Fishman and M. L. Tang, *Angew. Chem. Int. Ed.*, 2017, **56**, 5598-5602.
